# Supplementary material
Source: HighWire-hosted journal article supplement (https://gut.bmj.com/content/67/2/216)
Supplement: inline-supplementary-material-4 [file inline-supplementary-material-4.xlsx]

## Sheet: Supplementary Table 3
Supplementary Table 3: Relative percent phylotype abundance across all 119 samples
Phylotype (Phy) number	Designation	P1_OAX	P2_OAX	P3_OAX	P4_OAX	P5_OAX	P6_OAX	P7_OAX	P8_OAX	P9_OAX	P10_OAX	P11_OAX	P12_OAX	P13_OAX	P14_OAX	P15_OAX	P16_OAX	P1_SAX	P2_SAX	P3_SAX	P4_SAX	P5_SAX	P6_SAX	P7_SAX	P8_SAX	P9_SAX	P10_SAX	P11_SAX	P12_SAX	P13_SAX	P14_SAX	P15_SAX	P16_SAX	P1_DAX	P2_DAX	P3_DAX	P4_DAX	P5_DAX	P6_DAX	P7_DAX	P8_DAX	P9_DAX	P10_DAX	P11_DAX	P12_DAX	P13_DAX	P14_DAX	P15_DAX	P16_DAX
1	Helicobacter_pylori	0	0.0783009	0.127239	0	0	0	2.14349	0	0	0.00978761	0	0.127239	0.215327	0	0	0	0	0	0	0	0.00978761	0	0	0	0	0.00978761	0	0.156602	0	0.626407	0	0	0	0.0195752	0	0	0	0.440442	0	0	0	0	0	0.24469	0.0880885	0.0195752	0	0
2	Streptococcus	0.45023	1.3409	4.88402	1.106	0.802584	60.37	8.63267	10.2868	2.70138	1.87922	1.81071	0.0195752	7.41901	3.67035	0.783009	1.79113	3.59205	0.968973	0.890672	0.41108	0.283841	17.2947	1.77156	3.07331	10.7272	6.99814	9.41568	3.22991	0.724283	11.8528	9.64079	12.4498	5.24616	13.8201	3.02437	1.14515	0.978761	12.1171	44.9055	8.6914	3.43545	4.40442	16.1593	6.80239	4.78614	50.8466	14.8282	17.0011
3	Streptococcus_salivarius_or_vestibularis	1.24303	0.0293628	1.4975	5.6866	8.36841	0.469805	3.4746	0.20554	13.869	0.234903	1.36048	0	3.49418	0.93961	0.185965	0.430655	3.87589	0.00978761	1.78134	13.5656	5.53	1.11579	0.0293628	2.4469	5.04062	1.38984	0.90046	0	2.67202	1.32133	1.51708	0.86131	2.61329	0.0783009	2.43711	12.5379	8.23138	1.31154	5.44191	2.66223	0.41108	1.84986	0.636195	0.0195752	15.4253	0.890672	2.0554	2.63287
4	Prevotella_melaninogenica	1.93795	1.17451	2.75032	0.851522	2.00646	2.14349	9.0046	0.215327	10.5902	2.5252	1.96731	0.0293628	3.10267	9.3178	2.18264	2.33924	2.65244	3.76823	7.45816	0.93961	2.96565	4.74699	8.83821	0.195752	9.52334	0.45023	0.959186	12.3324	1.90858	4.92317	2.78947	2.1337	7.69306	0.137027	0.234903	0.362142	0.048938	3.1614	0.146814	0.20554	1.22345	1.106	2.10434	1.17451	0.322991	0.783009	3.21034	0.0587257
5	Fusobacterium_periodonticum	0.567681	2.17285	0.597044	5.97044	0.538318	0	1.73241	0	3.0831	0	8.98502	0.0293628	1.54644	7.67349	1.29196	0.968973	0.812372	7.11559	0.460018	1.19409	0.20554	0	2.76011	0.0195752	6.7143	0	6.65557	12.8413	2.01625	1.81071	5.16786	1.0277	0.0880885	3.03416	0.146814	0.00978761	0	0.303416	0.0293628	0.0195752	0.0880885	0	4.36527	0.665557	0.127239	0.587257	2.67202	0.401292
6	Pseudomonas	0	0.0685133	0	0.0978761	0	0	0.86131	0	0	0.00978761	0	2.64265	0	0	0.792796	0.0391504	0	0	0	0	0	0	0	0	0	0.0195752	0	0	0.00978761	0	0.0195752	0	0	0.313203	0.479593	1.36048	0.48938	0.430655	0.176177	0.00978761	3.25927	0	0.0293628	1.40942	0.20554	0.293628	0	0.166389
7	Gemella_sanguinis	0.968973	0.45023	0.792796	0.998336	0	0.606832	0.391504	0.176177	2.5252	0	1.74219	0	1.01791	2.83841	0.342566	0.812372	1.05706	1.16473	2.28051	0.371929	0	1.01791	0	0.763433	5.08956	0.00978761	1.75198	5.39297	0.303416	2.39796	1.56602	0.508956	1.05706	4.3457	4.27719	0.225115	0	0.440442	0.968973	0.890672	0.0685133	0.0195752	1.31154	0.822159	0.978761	1.19409	4.03249	0.371929
8	Rothia_mucilaginosa	1.71283	0.0587257	0.871097	0.626407	0.508956	2.69159	1.45835	0.293628	4.5023	1.13536	1.00812	0.0587257	1.00812	1.13536	0.460018	2.99501	0.920035	0.0195752	1.06685	0.137027	1.61496	4.28697	0.00978761	0.949398	0.41108	3.79759	0.557894	0.469805	0.215327	8.09435	0.90046	1.17451	0.548106	0.146814	4.32612	1.44857	0.988548	6.49897	2.38818	0.636195	1.94773	7.14495	1.13536	0.508956	0.322991	2.82862	2.53499	0.831947
9	Neisseria	0.0587257	0.0685133	0.00978761	0.499168	0.0195752	0	1.87922	0	0.440442	0	32.4949	0.254478	0	5.2168	0.86131	3.01458	0.185965	0.841734	0.00978761	0.0783009	0.146814	0	2.17285	0	0.146814	0	8.97524	2.50563	0.00978761	0.929823	3.73887	2.83841	1.65411	0.0391504	0.0195752	0.048938	0	0.215327	0	0	0.567681	0	7.20368	0.352354	0.166389	0.0783009	1.90858	4.88402
10	Streptococcus	2.01625	0	0.978761	0.0391504	14.5933	0.313203	0.69492	0	0	2.212	0	0	0	0	0	0	0.254478	0	1.93795	0.20554	24.2928	1.74219	0	0	0	8.01605	0	0	0	0	0	0	0.0783009	0	3.07331	0.332779	53.2544	2.5252	0	0	0.528531	7.93775	0	0	0	0	0.0195752	0
11	Streptococcus	1.04727	0	0.890672	2.98522	1.42899	0.166389	0.626407	0.479593	0.577469	0.117451	0.783009	0.195752	2.17285	0.479593	0.048938	0.185965	2.1337	0	0.313203	1.46814	1.13536	0.548106	0.00978761	6.23471	0.508956	1.36048	0.479593	0.86131	1.09621	0.871097	0.998336	0.234903	1.14515	0.0587257	0.362142	0.763433	1.65411	0.45023	0.704708	13.4873	0.743858	1.58559	0.293628	0.234903	9.55271	0.65577	1.08642	0.381717
12	Streptococcus_parasanguinis	2.57414	0.00978761	0.156602	0.0880885	1.3409	0.920035	1.99667	0.381717	3.58226	0.518743	0.0195752	0.0195752	0.176177	0.499168	0.00978761	0.851522	3.03416	0	0.645982	0.293628	1.23324	2.76989	0	1.48772	2.50563	2.72096	0	0.117451	0.215327	1.07664	0.117451	0.391504	2.12391	0	0.743858	0.479593	2.01625	1.48772	1.79113	2.02604	0.20554	4.60018	0	0.548106	0.988548	0.65577	0.254478	1.04727
13	Leptotrichia	5.12871	0.117451	6.18577	0.195752	0.332779	0	0.704708	0	0	5.19722	0.851522	0	2.45669	0.469805	0.0195752	0	1.63453	0.371929	2.66223	0.440442	0.225115	0	21.2195	0.0685133	0	2.30009	0.371929	0.0195752	8.16287	0.538318	0.381717	0	1.44857	0.185965	0.0195752	0.0978761	0	0.0195752	0	0.127239	0.704708	1.36048	0.773221	0	0.69492	0.41108	0.00978761	0.00978761
14	Veillonella_atypica	0.812372	0.0293628	1.69326	2.98522	7.91818	0.528531	4.47294	5.36361	2.6818	11.0111	0.0783009	0.606832	7.33092	6.48918	10.2281	0.675345	1.90858	0.0293628	1.00812	1.8205	2.76989	1.69326	2.10434	0.597044	0.332779	0.460018	0.0391504	0.616619	1.94773	0.156602	0.0978761	0.929823	0.704708	0.0978761	0.107664	7.55603	0.303416	1.44857	0.176177	0.215327	0.0293628	0.616619	0.048938	0.0880885	0.274053	0.665557	0.420867	0.195752
15	Granulicatella	1.27239	0.20554	0.518743	2.87756	0.420867	1.13536	1.19409	0.283841	2.16306	0.362142	3.3963	0.00978761	0.704708	1.1843	0.185965	4.54145	0.841734	0.352354	0.792796	0.93961	0.469805	3.20055	0.362142	1.15494	4.33591	1.16473	1.9771	1.8205	0.234903	1.77156	1.53665	1.78134	1.91837	2.17285	4.94274	1.40942	0.24469	2.76989	1.48772	0.460018	0.127239	1.37027	3.46481	0.724283	0.890672	0.792796	6.52834	2.39796
16	Streptococcus	0.401292	0.00978761	0.176177	2.57414	0.322991	4.75678	0.929823	3.04395	0.313203	0.293628	0	0.176177	2.39796	0.0293628	0.0293628	0.567681	3.57248	0.0587257	0	0.528531	1.0277	0.890672	0.0880885	0.812372	0.871097	0.518743	0.0195752	0.0783009	0.0391504	0.0880885	0.00978761	1.56602	1.60517	0.783009	0.225115	0.469805	1.28218	1.06685	9.84633	1.69326	0.313203	0.41108	0.0783009	0.166389	0.783009	0.137027	0	4.92317
17	Prevotella_histicola	3.72908	0	3.62142	1.30175	1.94773	0.137027	0.469805	0.185965	1.55623	2.93628	0	0	1.87922	4.2674	0	1.86943	4.79593	0.0293628	4.97211	3.73887	2.72096	0.597044	0.0880885	0.127239	1.08642	0.841734	0	0.00978761	6.89048	0.460018	0	2.35881	8.11393	0.00978761	0.166389	2.26094	0.24469	0.665557	0	0.166389	0.538318	1.68347	0	0	0.24469	0.606832	0	0.00978761
18	Propionobacterium_acnes	0	0.499168	0	0.264265	0.0293628	0.0880885	1.94773	0.440442	0.00978761	0.0685133	0.0195752	21.9634	0.0783009	0	1.39963	0.0293628	0	0	0.0391504	0	0.0880885	0.0195752	0.00978761	0	0	0.0391504	0.00978761	0.00978761	0.048938	0	0	0	0	0.254478	1.08642	3.20055	0.371929	7.14495	0.342566	0.00978761	23.4315	0.0293628	0.166389	13.8005	1.15494	0.362142	0.0685133	0.420867
19	Prevotella_pallens	0	0.264265	1.106	0.391504	0.0391504	0	2.65244	0	1.62474	0	1.07664	0.00978761	0.910248	0.665557	0.841734	0.234903	0	2.70138	1.51708	0.430655	0.0293628	0	7.05687	0	2.72096	0	1.1843	7.91818	4.17931	0.137027	0.704708	0.890672	0	0	0.0391504	0.322991	0	0.20554	0	0	1.63453	0	0.978761	0.127239	0.107664	0.616619	0.0685133	0.00978761
20	Gemella_haemolysans	0.107664	0.0783009	0.234903	0.675345	0.0195752	3.67035	0.254478	0.137027	0.254478	0.0783009	1.17451	0.00978761	0.851522	0.577469	0.0293628	0.107664	0.127239	0.166389	0.274053	0.460018	0.0391504	0.597044	0	1.9771	2.00646	0.176177	6.23471	0.381717	0.274053	3.318	0.362142	0.959186	0.0880885	0.880885	1.65411	0.146814	0.137027	0.391504	0.362142	3.0831	0.127239	0.24469	5.01126	0.420867	2.76989	1.0277	2.15327	0.704708
21	Prevotella	0	0	2.10434	1.106	0.929823	0	1.01791	0.430655	0.577469	4.13037	0.195752	0.69492	5.53	0.24469	1.3409	0.127239	0	0.352354	2.64265	2.97543	2.85798	0	0.48938	0.41108	1.07664	0.528531	0.0195752	0.176177	10.8153	0.724283	2.33924	0.225115	0	0.0685133	0.166389	7.34071	0.0685133	0.988548	0	0.342566	0.322991	1.54644	0.146814	0.469805	0.685133	2.26094	0.518743	0
22	Streptococcus_pyogenes	0	0.0391504	0	0	0	0	0	0	0	0.0685133	0	6.7143	0.0195752	0.00978761	0.665557	2.83841	0	0	0	0	0	0	0	0	0	0.0195752	0.0195752	0	0.0195752	0.0293628	0	0.332779	0	0.391504	0	0	0	0	0	0	0.0783009	0.0587257	1.42899	18.6748	2.9265	5.17765	0.137027	0.636195
23	Gemella	0.0195752	0	0.293628	0.048938	0.0195752	0.606832	0.86131	0.479593	0.0978761	0.0978761	0.352354	0.381717	0.851522	0.0978761	0.117451	0.048938	0.048938	0.0587257	0.234903	0.0293628	0.048938	0.274053	0	0.636195	0.831947	0.313203	4.6589	1.51708	0.420867	0.616619	1.56602	0.665557	0.048938	0.332779	0.743858	0.0978761	0	1.71283	0.146814	2.9265	0	0.225115	3.97377	0.508956	3.61163	0.362142	5.99002	0.636195
24	Actinomyces	0.430655	0.195752	1.92816	4.46315	2.49584	0.264265	0.69492	0.0293628	1.4192	4.31634	0.587257	0	2.17285	0.401292	0.185965	0.420867	0.195752	0.420867	1.03749	0.90046	3.45503	0.616619	0.166389	0.0391504	0.792796	5.38318	0.587257	2.02604	0.322991	0.371929	0.303416	0.479593	0.313203	1.38984	3.5529	1.31154	2.58393	0.763433	3.21034	0.00978761	1.57581	4.66869	0.753646	0.430655	0.822159	0.274053	0.352354	0.322991
25	Haemophilus	5.18743	10.2672	1.46814	6.5577	2.61329	1.03749	4.37506	0.792796	5.32446	2.14349	0.234903	0.342566	0.597044	2.95586	4.27719	2.30009	2.91671	0.949398	0.420867	0.548106	1.53665	0.303416	3.45503	0.988548	5.06998	11.0404	0.528531	2.26094	0.440442	0.763433	4.1891	0.675345	9.89527	0.0391504	0.0391504	0.0293628	0	0.469805	0	0.176177	0.362142	8.78927	0.362142	0.0880885	0.0685133	0.146814	3.90526	4.6589
26	Streptococcus_parasanguinis	0.362142	0	1.57581	0.107664	0.743858	0.166389	0.812372	0.0195752	0.626407	1.71283	0.636195	0	0.420867	0.156602	0.0880885	0.567681	0.342566	0.00978761	2.81883	0.362142	0.156602	0.753646	0.597044	1.75198	0.322991	1.52687	0.626407	1.03749	0.371929	0.274053	0.743858	0.685133	0.293628	0.0195752	5.26573	0.968973	0.0587257	0.65577	0.215327	1.73241	1.0277	1.37027	0.362142	0.332779	2.76011	0.195752	1.19409	1.63453
27	Helicobacter_pylori	0	0	0	0	0	0	1.15494	0	0	0	0	0	0	0	0	0	0	0	0	0	0	0	0	0	0	0	0	0	0	0	0	0	0	0	0.0587257	0	0	0.234903	0	0	0	0	0	0	0	0	0	0
28	Enhydrobacter_aerosaccus	0	0	0	0.048938	0	0	0.24469	0	0	0	0	1.01791	0.0391504	0	0.048938	0	0	0	0	0	0	0	0.00978761	0	0	0.00978761	0	0	0	0	0	0	0	0	0.0783009	0.851522	0.303416	0.743858	0.0195752	0	0.86131	0	0.0195752	0.371929	0.0685133	0.0783009	0	0.0195752
29	Granulicatella	1.61496	0.0685133	0.401292	1.13536	0.792796	0.303416	0.499168	0.548106	0.685133	0.587257	1.38005	2.80904	1.06685	2.12391	0.048938	1.21366	0.998336	0.156602	0.391504	0.469805	0.714495	0.822159	0.048938	1.31154	1.75198	1.60517	0.636195	1.04727	0.156602	2.9265	1.05706	0.518743	1.80092	0.616619	3.42566	0.45023	0.910248	1.15494	0.704708	0.949398	0.117451	1.59538	1.106	0.264265	0.929823	1.32133	4.424	1.16473
30	Helicobacter_pylori	0	0	0	0	0	0.0195752	0	0	0	0	0	0	0	0	0	0	0	0	0	0	0	0.00978761	0	0	0	0	0	0	0	0	0	0	0	0.0195752	0	0	0	0	0	0	0	0	0	0	0	0	0	0
31	Parvimonas_micra	0.00978761	0.381717	0.371929	0.557894	0.0195752	0.0391504	0.90046	0	0.107664	0.0783009	0.0978761	0	0.841734	0.0685133	0	8.51522	0.0685133	1.69326	1.71283	6.01938	0.920035	1.21366	0.0391504	0.577469	0.65577	0.86131	0.195752	0.293628	0.352354	2.17285	0.929823	4.62954	0.0293628	6.62621	1.76177	1.14515	0	1.69326	0	0.440442	0.156602	0.234903	0.988548	1.43878	2.06519	0.538318	1.29196	1.57581
32	Streptococcus	0.0391504	0.264265	1.32133	0.166389	0.166389	1.8205	0.508956	0.69492	0.00978761	0.0587257	0.048938	0	0.841734	0.0587257	0.0195752	0.0880885	0.479593	0	0.20554	0.048938	0.0391504	0.636195	0.00978761	0.371929	0.0391504	0.195752	0.440442	0.107664	0.0195752	0.156602	0.0685133	0.0783009	0.166389	0.146814	0.910248	0.048938	0.156602	0.479593	0.156602	0.988548	0.146814	0.107664	1.0277	0.0195752	0.597044	0.0783009	0.215327	0.508956
33	Leptotrichia	16.0713	0	4.77635	0.048938	5.08956	0.00978761	0	0.0391504	0.0195752	1.48772	0.0783009	0	4.2674	0	0.156602	0.0587257	7.13517	0	6.82196	0	0.479593	0	0	0.225115	0.156602	0.557894	0.00978761	1.1843	3.51375	0.00978761	0.362142	0.0880885	2.91671	0.048938	0	0	0	0.117451	0	0.283841	0.342566	0.401292	0.00978761	0	0.107664	0.508956	1.73241	0
34	Prevotella	0.557894	0	0.890672	2.08476	1.36048	0	1.06685	0	0.176177	4.94274	0	0	1.76177	0.00978761	0	0.254478	0.636195	0.00978761	1.81071	6.99814	3.32779	0	2.96565	0	0.401292	0.0880885	0	0	2.81883	0	0	0.127239	0.734071	0.00978761	0.283841	7.64412	0.293628	0.391504	0	0	0.675345	0.332779	0	0.00978761	0.166389	0.342566	0	0.00978761
35	Alloprevotella	1.16473	0.587257	0.254478	0.274053	0.0293628	0.0391504	1.31154	0.00978761	3.85632	2.73074	0.352354	0.0195752	0.792796	0.714495	2.01625	0.508956	5.63766	1.47793	0.0978761	0.763433	0.0783009	0.890672	0.548106	0.00978761	1.33111	0.00978761	1.21366	3.96398	3.05373	0.499168	2.76989	0.998336	6.43046	0.0783009	0.0293628	0.45023	0	0.156602	0.048938	0	0.185965	0	0.469805	0.0685133	0.0195752	0.137027	3.73887	0.00978761
36	Helicobacter_pylori	0	0	0	0	0	0	0.0685133	0	0	0	0	0	0	0	0	0	0	0	0	0	0	0	0	0	0	0	0	0	0	0	0	0	0	0	0	0	0	0.166389	0	0	0	0	0	0	0	0	0	0
37	Haemophilus_parainfluenzae	0.107664	2.91671	0.929823	3.36694	0.597044	4.10101	0.773221	0.20554	1.15494	0.24469	2.58393	0.381717	0.802584	1.56602	0.391504	1.31154	0.0880885	0.714495	0.107664	0.479593	0.234903	1.28218	0.00978761	0.0391504	0.880885	3.2397	2.57414	0.783009	0.342566	0.45023	0.362142	0.577469	0.313203	0.00978761	0.00978761	0.0195752	0.0293628	0.479593	0	0.00978761	0	3.21034	1.61496	0.107664	0.0195752	0.0978761	0.176177	7.34071
38	Veillonella	0.185965	0	0.920035	1.46814	6.30322	0.41108	1.07664	0.0880885	1.23324	0.802584	0	0	2.2903	0.264265	0.283841	0.215327	0.538318	0	0.93961	0.401292	1.84986	0.381717	0.45023	0.0587257	0.303416	0.381717	0	0.166389	0.69492	0.107664	0.0293628	0.371929	0.41108	0	0.00978761	0.528531	0.0391504	0.283841	0.0783009	0.00978761	0.156602	0.499168	0	0.0391504	0.107664	0.41108	0.0880885	0.274053
39	Lactobacillus_gasseri	0	0	0.0783009	0	0.0978761	0	0	0	0.00978761	0.0391504	0	0.0195752	0	0	0	0	0.00978761	0	0.107664	0	0.606832	0.048938	0	0	0.00978761	0.0587257	0	0	0	0	0	0	0	0	0.303416	0	0.195752	0.0293628	0	0	0.234903	0.0195752	0	0	0	0	0.00978761	0
40	Streptococcus_parasanguinis	1.38005	0	0.548106	1.46814	0.41108	0.371929	0.675345	0.518743	0.303416	0.0880885	0	0.00978761	0.215327	0.185965	0	0.185965	0.988548	0	0.910248	2.23157	0.176177	1.4975	0.0783009	0.929823	0.176177	0.841734	0.00978761	0.577469	0.176177	0.362142	0.812372	0.127239	0.665557	0.00978761	1.8988	3.18097	0.0978761	1.14515	0.0978761	1.1843	0.499168	1.25281	0	0.322991	0.841734	0.107664	1.44857	0.381717
41	Streptococcus_oralis	0.538318	0.0293628	0.322991	0.645982	1.57581	0	0.322991	0.166389	0.20554	0.127239	0.577469	0	0.185965	0.137027	0.0195752	0.195752	0.283841	0.00978761	0.127239	0.45023	1.15494	0.00978761	1.0277	0.401292	0.146814	0.20554	0.479593	0.548106	0.0880885	0.792796	0.215327	0.117451	0.283841	0.24469	0.508956	0.166389	2.09455	0.156602	0.48938	0.48938	0.469805	0.303416	0.783009	0.332779	0.851522	0.362142	0.254478	0.215327
42	Actinomyces	2.43711	0	0.0293628	0.831947	0.166389	0	1.3409	0	7.53646	0	0	0.0293628	4.74699	0.90046	0.352354	0	2.07497	0.0293628	0.0880885	0.704708	1.1843	0	0	0.00978761	0.714495	0	0.00978761	0.0391504	3.51375	0.69492	0.225115	0	2.16306	0.048938	0.234903	0.665557	0.469805	0.24469	5.62788	0	0.0587257	0	0	0.0391504	14.8087	0.636195	0.430655	0
43	Alloprevotella	0.0195752	3.0048	0.41108	0.048938	0	0.127239	2.03582	12.9294	0.303416	0	0	0.0195752	0.391504	1.35069	0.675345	11.3928	0.352354	1.37027	0.499168	0.0685133	0.0293628	10.6196	0.146814	8.30968	0.0685133	0	0	0.0195752	1.08642	1.05706	1.0277	7.71264	0.24469	0.048938	0.195752	0	0	3.01458	0.0587257	3.75844	0.0391504	0	0.0195752	0.0978761	0.00978761	0.048938	0.792796	0.0391504
44	Fusobacterium	0.048938	0.0978761	0.538318	0.166389	0.362142	0.0685133	0.0880885	0.293628	0.048938	0.0293628	0.0391504	0.107664	0.0880885	0.0195752	0	0.430655	0.107664	1.0277	0.929823	2.45669	0.831947	0.225115	0.0293628	0.675345	1.05706	1.14515	0.048938	0.166389	0.234903	2.0554	0.841734	1.81071	0.00978761	0.048938	0.0587257	0.548106	0	0.371929	0	0.45023	0.215327	0.137027	0.234903	0	0.0391504	0.0783009	0.274053	0.880885
45	Staphylococcus_epidermidis	0	0.0978761	0	0.0293628	0	0.00978761	0.146814	0	0	0	0.00978761	14.564	0.00978761	0	1.03749	0	0	0	0.0293628	0	0	0.00978761	0	0.00978761	0.00978761	0	0	0	0.0293628	0	0	0	0	0.0391504	0.117451	0.166389	0.127239	2.212	0	0.00978761	7.35049	0	0.0587257	0.626407	0.00978761	0.0783009	0	0.00978761
46	Actinomyces	1.06685	0.107664	1.51708	1.19409	0.215327	0	0.0195752	0	0	0	0.0195752	0	0.0195752	0	0.195752	0.264265	0.420867	0.41108	0.86131	0.968973	0.420867	0	0.0685133	0	0	0.00978761	0	0	0	0.0195752	0.685133	0.734071	0.48938	1.96731	2.30988	0.0880885	0.45023	2.10434	0	0	0.831947	0	0.00978761	0.00978761	0	0	0.293628	0.460018
47	Veillonella	0.20554	0.48938	0.0195752	2.6818	0.225115	0.0293628	1.22345	0.430655	0.880885	0.0293628	0.460018	0.117451	0.41108	8.56416	2.33924	0.156602	0.0880885	0.24469	0.048938	0.352354	0.0880885	0	0.93961	0.0391504	0.254478	0.0293628	0.587257	0.322991	0.0880885	0.499168	0.0391504	0.0685133	0.195752	0.342566	0.0195752	0.528531	0	0.0783009	0.137027	0.0391504	0.048938	0.048938	0.322991	0.048938	0.0880885	0.0880885	0.274053	0.00978761
48	Streptococcus	1.56602	0	0.048938	0.195752	0	0.0293628	0.048938	0	0.185965	0	0.518743	0.00978761	0	1.09621	0	0.381717	0.890672	0.0293628	0.0293628	0.0587257	0.0293628	0.225115	0	0	0.577469	0	0.538318	0.959186	0	3.19076	0.127239	0.0293628	0.90046	0.0587257	0.0391504	0.00978761	0	0.107664	0.499168	0	0.802584	0.00978761	0.753646	0.342566	0	0.645982	0.234903	0.137027
49	Campylobacter	0.988548	0.0783009	0.910248	0.156602	0.0783009	0.00978761	0.420867	0.469805	1.2626	5.80405	0.0587257	0	0.41108	0.137027	14.0844	0.86131	0.538318	0.0587257	1.19409	0.440442	0.0391504	0	2.57414	0.460018	1.30175	0.293628	0.0880885	1.15494	1.96731	0.0293628	0.792796	0.86131	1.31154	0	0	0.283841	0	0.0195752	0.00978761	0.313203	0.107664	0.274053	0.0293628	0.0195752	0.0195752	0.0587257	0.176177	0.968973
50	Fusobacterium_nucleatum	0	0.518743	0.704708	0.538318	0.0978761	0.0293628	0.381717	5.06998	0.293628	0.303416	0.0195752	0.0293628	0.812372	0.146814	0.00978761	0	0	1.47793	3.28864	6.4794	0.24469	0	0.548106	2.97543	0.548106	0.0880885	0	0	3.09288	3.42566	0.166389	0	0	0.0391504	0.0195752	0.469805	0.00978761	0.0880885	0.00978761	1.15494	0	0.00978761	0	0.00978761	0.00978761	0.176177	0.0391504	0
51	Corynebacterium_tuberculostearicum	0	0	0	0.0195752	0	0	0.381717	0	0	0	0	8.1335	0	0	0.215327	0	0	0	0	0	0	0	0	0	0	0.0293628	0	0	0	0	0	0	0	0.0293628	0.048938	0.538318	0.176177	1.75198	0.0978761	0	4.83508	0	0.00978761	1.70304	0.0195752	0.048938	0	0.048938
52	Atopobium	0.048938	0.0293628	0.313203	1.01791	1.74219	0.176177	0.20554	0.0587257	0.518743	0.225115	0	0	1.40942	0.274053	0.0195752	0	0.156602	0.117451	0.479593	0.998336	0.831947	0.430655	0.107664	0.0195752	0.048938	0.0293628	0.0783009	0.215327	0.714495	0.0880885	0.00978761	0	0.0685133	0.968973	1.09621	3.83674	1.24303	0.371929	0.048938	0.00978761	0.420867	0.0195752	0.0391504	0	1.57581	0.195752	0.0880885	0.048938
53	Fusobacterium_nucleatum	0.117451	0.685133	0.127239	0.117451	0.00978761	0	0.0195752	0	0.264265	0.0587257	0.645982	0	0.0587257	0.567681	0	0.0978761	0.254478	4.75678	0.195752	0.371929	0.048938	0	0.401292	0.156602	1.33111	0.0880885	1.11579	0.00978761	0.0880885	0.508956	0.332779	0.41108	0.048938	2.02604	0.00978761	0.0587257	0	0.0587257	0.00978761	0.606832	0	0.156602	0.156602	0.146814	0.0195752	0.0195752	0.176177	0.0391504
54	Eubacterium	0	0.0685133	0.166389	0.401292	0.0195752	0.0880885	0.352354	0	0.0783009	0.0587257	0	0	0.156602	0	0.0195752	3.99334	0.0587257	0.704708	0.802584	2.98522	0.176177	0.274053	0.00978761	0.871097	0.704708	0.597044	0	0.156602	0.127239	0.127239	0.528531	0.724283	0.107664	2.48605	2.20221	1.01791	0	0.792796	0	1.08642	0	0.313203	0	0.156602	1.54644	0.166389	1.38005	0.968973
55	Lachnoanaerobaculum_orale	0.048938	0	0.254478	0.0685133	0.322991	0.0391504	0.107664	0.107664	0.166389	0.606832	0.0391504	0	2.45669	0.048938	0	0.166389	0.185965	0	0.430655	0.352354	0.332779	0.107664	0.176177	0.0685133	0.20554	0.548106	0.0195752	1.61496	1.47793	0.0587257	0.264265	0.303416	0.0587257	0.0587257	0	0.20554	0	0.0391504	0.0195752	0.107664	0	0.156602	0.0293628	0	0.156602	0.567681	0.0293628	0.0978761
56	Megasphaera_micronuciformis	0.0880885	2.85798	2.73074	0.332779	1.04727	0.00978761	0.577469	0.137027	0.557894	6.7143	0.00978761	0.0293628	1.46814	0.391504	3.12225	0.195752	0.557894	0.156602	0.156602	0.41108	0.420867	0.0783009	0.597044	0.0293628	0.048938	0.0685133	0	0.0195752	0.548106	0.0685133	0.107664	0.156602	0.440442	0.264265	0.195752	1.21366	0	0.215327	0	0	0.0978761	0.0783009	0.0195752	0	0.0978761	0.0978761	0.215327	0
57	Prevotella_nanceiensis	0.24469	0.0880885	0	3.22012	0	0	0.518743	0	0.978761	0	0.890672	0	0.048938	0.567681	1.3409	0.215327	0.538318	1.14515	0	0.675345	0	0.0783009	0.00978761	0	1.1843	0	0.685133	1.15494	0.0293628	0.176177	1.04727	0.254478	1.8988	0	0.0195752	0.293628	0	0.146814	0	0	0.146814	0	0.968973	0	0.0293628	0	2.65244	0
58	Haemophilus	0	4.71763	0.0978761	0.00978761	0	0	0.0391504	0	0.048938	0.156602	0.332779	0.322991	0.0391504	0.548106	0.0195752	0.518743	0.146814	0.0978761	0.0195752	0.107664	0	0	0	0	0	4.08143	2.53499	0.166389	0.00978761	1.48772	0.048938	4.07165	0.117451	0	0	0	0	0.00978761	0	0	0.048938	8.46628	0.518743	0.0391504	0.00978761	0.0391504	0.234903	4.78614
59	Prevotella	0.763433	0.274053	0.880885	0.538318	0.41108	0.185965	0.998336	0.0880885	0.704708	1.54644	0.0587257	0	0.528531	0.0783009	0.724283	0.215327	0.518743	0.420867	1.37027	1.0277	0.460018	1.12558	2.72096	0.0880885	0.675345	0.0391504	0.0391504	0.293628	3.04395	0.234903	0.156602	0.352354	0.988548	0	0.0195752	0.587257	0	0.538318	0	0.048938	0.332779	0.146814	0.0195752	0.0195752	0.0293628	0.127239	0.0783009	0.0195752
60	Streptococcus	0	0	0.00978761	0.0587257	0	0.851522	0.45023	0	1.38984	0	0	0	0.381717	0	0	0.234903	0	0	0	0.0685133	0	1.47793	0.00978761	0.00978761	2.03582	0	0	0.65577	0.303416	0.0293628	0.107664	0.0978761	0	0.00978761	0	0	0	0.880885	1.35069	0	0	0	0	0.0978761	1.06685	0.0685133	0.293628	0.24469
61	Streptococcus	0	0	0	0	0	0	0	0	0	0.264265	0	0	0.146814	0	0	0	0	0	0	0	0	0	0	0	0.0195752	0.48938	0	0	0.0978761	0	0	0	0	0	0	0	0	0	0.0293628	0	0	0.460018	0	0	0.420867	0	0	0
62	Prevotella_oris	0.127239	0.48938	0.195752	0.48938	0.0391504	0.137027	0.802584	13.8984	0.0587257	0.401292	0.00978761	0.00978761	0.440442	0.0783009	8.08456	0.20554	0.254478	0.440442	0.146814	2.28051	0.430655	2.41754	0.0978761	8.55437	0.0685133	0.0880885	0.0783009	0.283841	0.538318	0.45023	1.46814	0.587257	0.234903	0	0.264265	0.41108	0	0.283841	0.0391504	3.7095	0.342566	0.0587257	0.0391504	0	0	0.0587257	0.567681	0
63	Streptococcus	0.430655	0	0	0.00978761	0.381717	0	0.0391504	0	0.127239	0	0	0	0.90046	0.0587257	0	0	0.107664	0	0	0	0.225115	0	0	0.0195752	0.107664	0	0	0.234903	0.342566	0.156602	0.313203	0	0.127239	0.0195752	0	0	0.401292	0.215327	0.127239	0.0293628	0	0	0	0.528531	2.03582	0.195752	0.783009	0
64	Paracoccus_marinus	0	0	0	0.00978761	0	0	0.156602	0.0783009	0	0.00978761	0.00978761	0	0	0	0.0880885	0.00978761	0	0	0	0.00978761	0	0	0	0	0.00978761	0	0	0	0	0	0	0	0	0	0.176177	0.626407	0	0.675345	0.215327	0	0.851522	0	0.00978761	0.69492	0.00978761	0.00978761	0.00978761	0.0195752
65	Eubacterium_sulci	0	0.137027	0	0.0195752	0	0	0	0	0	0	0.0685133	0	0.234903	0.107664	0	0	0	1.68347	0	0.0587257	0	0	0	0	0	0	0.127239	0.283841	0.469805	0.430655	0	0	0	9.82676	0	0.0880885	0	0	0	0	0	0	0.166389	0.0587257	3.0048	0.283841	0.0293628	0
66	Pasteurellaceae	0	0.048938	0	0	0	0.264265	0.00978761	0.0391504	0	0	0	0	0	5.06019	0	0.00978761	0	0	0	0	0	0.225115	0	0.00978761	0	0	0	0.606832	0	0.90046	0	0	0	0	0	0	0	0.0587257	0	0.00978761	0	0	0.0391504	0.0293628	0.048938	0	0	0.371929
67	Streptococcus	0	0	0.352354	0.0195752	0	0.0195752	0.048938	0.65577	0	0.20554	0	0	0	0	0	0.0880885	0	0	0.362142	0	0	0.00978761	0.00978761	0.822159	0	0.41108	0	0	0	0	0	0.00978761	0	0	0.626407	0	0.00978761	0.0195752	0.0195752	0.949398	1.86943	0.460018	0	0.00978761	0	0	0	0.0880885
68	Pasteurellaceae	0	0	0	0	0	0.0195752	0.048938	0	0.283841	0	0.910248	0	0	0	0.176177	0	0	0	0	0	0	0	0	0	0.0880885	0	12.1562	0	0	0	0.342566	0.0880885	0	0	0	0	0	0	0	0	0	0	7.98669	0.0783009	0.0195752	0	0.420867	0.831947
69	Actinomyces	0	0.048938	0.127239	1.2626	0.0587257	0	0	0	0.274053	0	0.0685133	0	0	2.40775	0.0195752	0	0	0.0685133	0	0.704708	0.0293628	0	0.0293628	0	0	0	0.0195752	0.920035	0	0.0880885	0	0	0	0.391504	0.0391504	0.763433	0	0.0978761	0.0685133	0	0.107664	0	0.0685133	0.20554	0	0.0195752	0	0.00978761
70	Streptococcus	0.0391504	0.0391504	0.342566	0	0	0.00978761	0.20554	5.16786	0	0.0195752	0.0587257	0	0.0978761	0	0.00978761	0.00978761	0.802584	0	0.0293628	0.00978761	0	0	0.743858	1.35069	0	0.00978761	0.234903	0.518743	0	0.0293628	0.0391504	0	2.04561	0.107664	0.234903	0	0.0293628	0.0587257	0.0195752	1.14515	0.342566	0.048938	0.538318	1.27239	0.0783009	0.0293628	0.0293628	0
71	Leptotrichia	0	0.0880885	0.048938	0.146814	0.0195752	0	0.137027	0	1.08642	0	0.00978761	0	0.48938	0.763433	0.048938	0	0	0.156602	0	0.0293628	0.00978761	0	0.156602	0	0.430655	0	0.0391504	1.76177	0.0783009	0.469805	0.440442	0	0	0.127239	0	0	0	0.0293628	0	0	0	0	0.0587257	0	0.0978761	0.322991	0.469805	0
72	Porphyromonas	0.127239	0.0783009	0.0293628	0.65577	0	0	0.146814	0	0.313203	0.0293628	0.45023	0.0195752	0.0195752	0.41108	0.176177	0.185965	0.499168	0.156602	0.00978761	0.137027	0	0	0.303416	0	0.460018	0	0.41108	0.352354	0.00978761	0.606832	0.587257	0.176177	0.753646	0	0	0.0293628	0	0.0685133	0	0	0	0	0.283841	0.048938	0	0.0195752	0.734071	0
73	Actinomyces	0.0195752	0	0	0.00978761	4.80572	0	0.048938	0	0	3.02437	0	0	0	0	0	0	0	0	0	0	1.47793	0	0.00978761	0	0	1.73241	0	0	0	0	0	0	0	0	0	0.0195752	1.98688	0.264265	0.00978761	0	0	1.36048	0	0	0	0	0	0
74	Streptococcus	0	0	0	0	0	0.00978761	0.0783009	0	0.137027	0	0	0	0.24469	0.127239	0	0	0.00978761	0	0	0	0	0.264265	0	0	0.0195752	0	0	0.0391504	0	0.274053	0.0391504	0	0.0391504	0	0	0	0	0.127239	0.0880885	0	0	0.00978761	0	0.0978761	0.0685133	0.185965	0.00978761	0.0391504
75	Prevotella	0	0	0.137027	0.215327	0.743858	0	0.048938	0.0978761	0.0685133	0.225115	0.283841	0	0	0.00978761	0.362142	0.0195752	0	0.0391504	0.381717	0.460018	2.32945	0	0	0.0391504	0.127239	0.0391504	0.0978761	0.0195752	0.0685133	0.0293628	0.597044	0	0	0	0.0391504	1.32133	0	0.254478	0.0195752	0.0391504	0.0293628	0.117451	0.0978761	0	0.00978761	0	0.156602	0
76	Fusobacterium_nucleatum	0.0978761	0.0293628	0.117451	0.538318	0.0783009	0.430655	1.64432	0	0.00978761	0.215327	0.0195752	0	0.332779	0.0783009	0.00978761	3.58226	0.342566	0.322991	0.225115	2.97543	0.69492	4.7372	0	0.0685133	0.391504	1.81071	0.127239	0.146814	0.988548	0	1.37027	1.46814	0.0195752	0.626407	0.0293628	0.391504	0	5.10913	0	0.0587257	0	0.107664	0.20554	0.0293628	0	0.176177	0.460018	0.440442
77	Leptotrichia	0.851522	0.00978761	0.0293628	0.264265	0	0	0.371929	0	0.0978761	0.332779	1.81071	0	0	0.0195752	0	0.0880885	0.548106	0.303416	0	0.0587257	0	0	0.606832	0.00978761	0	0.0978761	0.910248	1.08642	0.0195752	0	0.00978761	0.0685133	0.460018	0.0587257	0	0	0	0.00978761	0	0	0	0.479593	2.10434	0	0	0.430655	0	0
78	Rhodobacteraceae	0	0	0	0	0	0.0391504	0.0978761	0.176177	0	0.048938	0	1.16473	0	0	0.156602	0	0.00978761	0	0	0	0	0	0	0	0	0.0978761	0	0	0	0	0	0	0.00978761	0.00978761	0.479593	2.34903	0	0.548106	0.00978761	0	0.890672	0.0587257	0	0.401292	0.0391504	0.0880885	0	0.0293628
79	Actinomycetales	0	0.00978761	0	0.048938	0	0	0.20554	0.293628	0	0	0	3.92483	0	0.00978761	0.0587257	0	0	0	0.048938	0	0.00978761	0	0	0	0	0.00978761	0.0195752	0.00978761	0	0.0195752	0	0	0	0.0391504	0.0783009	1.68347	0.322991	0.675345	0.048938	0	4.86444	0	0.00978761	3.01458	0.127239	0.0587257	0.00978761	0.117451
80	Campylobacter_concisus	0.185965	0.645982	0.048938	0.322991	1.69326	1.14515	0.567681	0	0.0685133	0.20554	0.508956	0.0195752	0.665557	2.5252	0.469805	0.499168	0.371929	0.234903	0.41108	0.41108	1.1843	3.06352	0.528531	0.0587257	0.322991	0	0.93961	0.0391504	2.33924	0.773221	0.254478	0.41108	0.988548	0.00978761	0	0	0	1.32133	0	0.048938	0.146814	0.0195752	0.107664	0.0587257	0.0978761	0.0978761	0.0391504	0.499168
81	Enterococcus	0	0	0	0	0	0	0.0391504	0	0	0	0	0	0	0	0	0	0	0	0	0	0	0	0	0	0	0	0	0	0	0	0	0	0	0	0	0.00978761	0	0.00978761	0	0	0	0	0	0	0	0	0	0
82	Veillonella	0.00978761	0	0.254478	0.195752	1.43878	0	0.0880885	0.371929	0.00978761	3.90526	0	0	0.968973	0.00978761	0	0.166389	0.371929	0.00978761	0.332779	0.313203	0.538318	0	0	0.0195752	0.00978761	0.430655	0	0	0.714495	0.0195752	0	0.20554	0.557894	0.00978761	0.0293628	4.05207	0	0.048938	0.0195752	0.0293628	0.0685133	0.548106	0	0	0.0195752	0.0880885	0	0.0880885
83	Enhydrobacter	0	0	0	0.00978761	0	0	0	0	0	0.00978761	0	0	0	0	0.00978761	0	0	0	0	0	0	0	0	0	0	0.048938	0.00978761	0	0	0	0	0	0	0.00978761	0.00978761	0.137027	0	0.0978761	0	0	0.225115	0	0	0.00978761	0.0195752	0.0293628	0	0
84	Solobacterium_moorei	0.127239	0.215327	0.117451	0.342566	0.0685133	0	0.606832	0	0.538318	0.303416	0	0	0.195752	0.0880885	0.107664	0.0293628	0.127239	0.381717	0.264265	1.88901	0.137027	0.469805	0.0195752	0.00978761	1.2626	0.0685133	0.0195752	0.313203	0.225115	0.0783009	0.0880885	0.0587257	0.048938	0.822159	0.342566	0.753646	0.107664	0.342566	0.137027	0.0685133	0	0.0978761	0	0.0978761	0.20554	0.0587257	0.166389	0.0587257
85	Streptococcus	0	0.0685133	0	0.734071	0	0	0	0	0	0	0.137027	0	0	0.00978761	0	0	0	0.215327	0	0.117451	0	0	0	0	0	0	0.048938	0.0195752	0	0.048938	0	0	0	0.685133	0	0.00978761	0	0	0	0	0	0	0.166389	0	0	0.0391504	0	0
86	Moryella	1.28218	0	0.597044	0.048938	0.322991	0.0293628	0.137027	0	0.293628	1.31154	0.0978761	0	0.303416	0	0	0.0685133	0.215327	0	0.293628	0.0587257	0.195752	0.137027	0.0685133	0.0880885	0.107664	0.783009	0.00978761	0	0.127239	0.156602	0.176177	0.0587257	0.176177	0	0	0.048938	0	0.0978761	0	0.195752	0.0195752	0.371929	0.0293628	0	0.048938	0.117451	0.0195752	0.0391504
87	Streptococcus	0.0391504	0	0.41108	0	0.048938	0.234903	0.0391504	0.0195752	0.00978761	0.0587257	0.146814	0	0.166389	0.00978761	0	0.00978761	0.371929	0.0195752	1.77156	0.0195752	0.0391504	0.225115	0	0.65577	0.117451	0.352354	0.117451	0.283841	0	0.851522	0.460018	0.117451	0.195752	0.166389	4.02271	0.0391504	0	0.176177	0.215327	1.38984	0.225115	0.254478	0.430655	0.342566	0.264265	0.645982	0.792796	0.146814
88	Streptococcus_dentisani	0	0	0	10.277	1.46814	0	0.0195752	0	0	0	0	0	0.107664	0	0	0.0293628	0	0	0.0195752	0.469805	0.0293628	0	0	0	0	0	0	0	0.0783009	0	0	0.185965	0	0	0.0783009	1.15494	0	0	0	0	0.048938	0	0	0.00978761	0.420867	0	0	0.401292
89	Rothia_dentocariosa	0	0.322991	0.841734	0.107664	0.41108	0.166389	0.195752	0.978761	0.176177	0.528531	0.0195752	0.606832	0.548106	0.156602	0.137027	0.234903	0.24469	0.00978761	0.234903	0	0.508956	0.440442	0	0.548106	0	0.920035	0.00978761	0.137027	0.048938	0.567681	0.195752	0.332779	0.137027	0.0195752	0.802584	0.00978761	0.0783009	0.45023	0.0391504	0.0587257	0.225115	1.47793	0.0783009	0.0391504	0.0293628	0.127239	0.0293628	0.557894
90	Leptotrichia	0.362142	0	0.597044	0	0.0587257	0	0.137027	0	0.00978761	0	0	0	0.0978761	0.0195752	0.117451	0	0.352354	0	0.724283	0.0195752	0.998336	0	2.35881	0.567681	0.127239	0	0	0	1.00812	0.391504	0.577469	0	0.342566	0	0.00978761	0	0	0.00978761	0	1.30175	0	0	0	0	0.176177	0	0.0978761	0
91	Campylobacter	0.0293628	1.04727	0	0.0391504	0	0	0	0.0880885	0.0195752	0.0195752	0.342566	0.048938	0	0.460018	0.743858	0.0195752	0.0880885	1.13536	0.0391504	0.440442	0.0391504	0.00978761	0.0293628	0.0587257	0.254478	0	0.225115	1.11579	0	0.0783009	0.274053	0.0195752	0.117451	0	0	0.0587257	0	0.0195752	0	0.0685133	0	0	0.0978761	0	0	0	0.0978761	0.0293628
92	Streptococcus	0.00978761	0.0880885	0.0587257	0	0	0	0.0587257	0	0.0195752	0.342566	0	0	0.0391504	0	0.00978761	0.0685133	0.156602	0.0195752	0.00978761	0	0	0	0	0.00978761	0.0587257	0.420867	0	0	0	0.0783009	0.0978761	0.0783009	0.0587257	0.166389	0	0	0	0.00978761	0.0195752	0.00978761	0	0.20554	0.00978761	0	0	0	0.381717	0.430655
93	Streptococcus	0.0783009	0.00978761	0.127239	0	0.0195752	0.0978761	0.0391504	0	0.0783009	0.0293628	0.0880885	0	0.107664	0.0293628	0.00978761	0	0.176177	0.00978761	0.303416	0.0195752	0.048938	0.362142	0.0195752	0.0391504	0.107664	0.107664	0.0293628	0	0.0195752	0.283841	0.146814	0.0293628	0.185965	0.107664	0.538318	0	0.0978761	0.225115	0.313203	0.0293628	0.137027	0.0783009	0.107664	0.00978761	0.137027	0.0195752	0.264265	0
94	Leptotrichia	12.7435	0.00978761	1.1843	0	1.23324	0	0	0	0	0.753646	0.0293628	0	0.773221	0	0	0	3.95419	0	0.724283	0	0.225115	0	0	0.254478	0.00978761	0.45023	0.00978761	0	0.626407	0.00978761	0	0	1.15494	0.0293628	0	0	0	0	0	0.420867	0.0293628	0.185965	0.048938	0	0	0.176177	0.0685133	0
95	Streptococcus	0.107664	0	0.0391504	0	2.54478	0.469805	0.313203	0	0.00978761	0.00978761	0	0	0	0.0391504	0	0	0.127239	0	0.0293628	0.00978761	1.8988	0.959186	0	0.293628	0	0.00978761	0	0	0	0.127239	0	0	0.0293628	0	0.0391504	0.0293628	1.79113	0.597044	0.00978761	0.41108	0	0	0	0	0	0.0685133	0	0
96	Streptococcus	0	0	0	0.0195752	0	0	0	0	0.0587257	0.185965	0	0	2.02604	0	0	0	0.0587257	0	0	0	0	0	0	0	0.0880885	0.391504	0	0	0.0587257	0	0	0	0.00978761	0.00978761	0	0	0	0.0293628	0.176177	0	0.00978761	0.440442	0	0.0195752	0.988548	0.176177	0	0
97	Streptococcus	0.0195752	0.0978761	0	0	0.00978761	0.0978761	0.048938	0	0.0293628	0.00978761	0	0.00978761	0.048938	0	0.00978761	0.048938	0	0.0685133	0.0293628	0	0.0391504	0.137027	0	0.0391504	0	0.0587257	0	0.0391504	0.0293628	0.0293628	0.0978761	0.274053	0	0.499168	0.117451	0	0	0.0978761	0.0293628	0	0.048938	0.107664	0	0.0391504	0.146814	0	0.20554	0.890672
98	Streptococcus	0.362142	0	0.0195752	0.00978761	0.0293628	0	0.117451	0	0.0783009	0.0978761	0.00978761	0	0.0293628	0	0.00978761	0	0.146814	0	0.0880885	0	0.00978761	0	0.0293628	0.00978761	0.048938	0.127239	0.0293628	0	0.0391504	0	0	0.00978761	0.107664	0	0.137027	0	0.048938	0.127239	0.0783009	0	0.0978761	0.107664	0.00978761	0	0.264265	0	0.00978761	0.0293628
99	Porphyromonas_gingivalis	0	3.98356	0	0	0	0	0.0391504	0	1.21366	0	0.0391504	0.0391504	0	0.381717	0.0978761	0	0	6.54791	0	0	0	0	0	0	0.665557	0.00978761	0	0.0195752	0	0.929823	0.636195	0	0	0.00978761	0	0	0	0.117451	0	0	0	0	0.00978761	0.0391504	0.00978761	0	0.254478	0
100	Leptotrichia	0.195752	0.0195752	0.420867	0	0.342566	0.0293628	0.0391504	0	0.0587257	0.20554	0	0.0293628	0.391504	0.0391504	0.00978761	0.137027	0.156602	0	0.362142	0	0.753646	0	0.0195752	0.998336	0.332779	0.146814	0	0.254478	0.146814	0.773221	0.166389	0.420867	0.117451	0	0	0	0.0195752	0.117451	0	2.30009	0	0.048938	0.0195752	0	0	0.127239	0	0.117451
101	Lachnospiraceae	0	0	0.0195752	0	0.00978761	0	0.440442	0	0	0	0	0	0.0293628	0.0391504	0	0	0	0	0.00978761	0	0	0	1.55623	0	0	0	0	0	0.00978761	0.117451	0.048938	0	0	0.0293628	0.0391504	0	0	0.0195752	0	0	0	0	0	0.048938	0	0.0978761	0.00978761	0
102	Actinomyces	7.83987	0	0.401292	0	0.871097	0.352354	0.137027	0.117451	0.0685133	1.25281	0	0	0	0	0	0	8.54458	0	0.0783009	0	0.117451	0.430655	0.00978761	0.0293628	0	0.362142	0	0	0	0	0	0	1.39963	0	0.185965	0.00978761	0.0880885	0.166389	0	0	0.0880885	0.264265	0	0.0391504	0	0.00978761	0	0
103	Staphylococcus_aureus	0	0	0	0	0	0.0195752	0.0293628	0	0	0	0	0.499168	0	0.00978761	0.0195752	0.0195752	0	0	0	0	0	0	0	2.94607	0	0	0	0	0	0	0	0	0	0.176177	0.0685133	0.00978761	0	0.0685133	0.0195752	2.31966	0.0293628	0	0	0.303416	0.0587257	0.00978761	0.0587257	0.0293628
104	Moryella	0.0195752	0.048938	0	0	0	0	0.0783009	0	0	0	0.342566	0	0.117451	0.41108	0.146814	0	0.0293628	0.371929	0	0	0	0	0.0685133	0	0	0	0.146814	1.72262	0.0391504	0.371929	0.528531	0.0880885	0.0293628	0.0587257	0	0	0	0	0	0	0	0	0.166389	0.176177	0	0.0978761	0.0783009	0.0293628
105	Haemophilus_sputorum	0	0	0	0	0	0	0.0391504	0	0.137027	0.107664	3.81717	0	0	0.802584	0	0	0	0	0	0	0	0	0	0	0.146814	0.303416	1.1843	0	0	0.0391504	0	0	0	0	0	0	0	0.0391504	0	0	0	0.215327	0.391504	0.048938	0	0.0195752	0	0
106	Streptococcus	0.00978761	0	0.00978761	0	0.0195752	0	0	0	0	0	0.577469	0	0	0.254478	0	0	0	0	0.00978761	0.00978761	0	0	0	0.00978761	0	0	0.69492	0.00978761	0	1.06685	0.00978761	0	0	0.00978761	0	0	0	0	0.00978761	0	0	0	1.39963	0	0.048938	0.45023	0.0293628	0
107	Bradyrhizobium	0	0	0	0	0	0	0	0	0	0	0	0	0	0	0	0	0	0	0	0	0	0	0	0	0	0	0	0	0	0	0	0	0	0	0	0	0	0	0	0	0	0	0	0	0	0	0	0
108	Neisseria_mucosa	0.00978761	0.0293628	0.00978761	0.0587257	0	0	0.117451	0.215327	0.24469	0	0.176177	0.00978761	0.127239	0.978761	0.00978761	0.0195752	0.274053	0	0	0.283841	0.048938	0	0.137027	0.381717	0.20554	0	0.293628	0.00978761	0.0978761	0.420867	0.166389	0.185965	1.40942	0.048938	0	0.166389	0.00978761	0.048938	0.00978761	0.0195752	0.048938	0.0195752	0.460018	0	0.0293628	0	0.0293628	0.352354
109	Oribacterium	0.567681	0.0195752	0.00978761	0.0783009	0.048938	0.048938	0.0685133	0	0.0880885	0.283841	0.0685133	0	0.225115	0.0978761	0.0880885	0.166389	0.48938	0.0587257	0.00978761	0.225115	0.313203	0.20554	0	0	0.127239	0.137027	0.0195752	0.548106	0.293628	0.274053	0.420867	0.41108	0.0293628	0.137027	0	0	0	0.107664	0.0195752	0.0195752	0	0.117451	0.0391504	0.00978761	0.00978761	0.048938	0.166389	0.332779
110	Gemella_morbillorum	0.0195752	0.0685133	0.0880885	0.0391504	0.00978761	0	0	0	0.0978761	0.00978761	0.0293628	0	0.0391504	0.0195752	0.0391504	0.00978761	0.0587257	0.127239	0.215327	0.675345	0.0391504	0	0	0.0587257	0.48938	0.0293628	0.0391504	0.127239	0.0391504	0.322991	0.381717	0.0685133	0.0783009	1.17451	0.401292	0.0293628	0	0	0.0391504	0.0685133	0	0.00978761	0.166389	0	0.0587257	0.00978761	0.479593	0
112	Veillonella_parvula_or_dispar	0.0391504	0.391504	0.0685133	0.0880885	0.0293628	0.479593	0.215327	0.714495	0.0195752	0.0880885	0	0	0.146814	0.156602	0.0880885	0.0293628	0.24469	0.0685133	0.117451	0.0783009	0.166389	0.362142	0.0293628	0.0783009	0.0293628	0.303416	0.0195752	0.048938	0.00978761	0.0880885	0	0.146814	0.24469	0.117451	0	0	0	0.176177	0	0.0783009	0	0.264265	0.00978761	0	0	0.0293628	0.107664	0
113	Brevundimonas	0	0	0	0.0391504	0	0.0195752	0.117451	0	0	0	0.00978761	0	0	0	0.0880885	0.00978761	0	0	0	0	0	0	0	0.00978761	0	0	0	0	0	0	0	0	0	0	0.137027	0.851522	0	0.107664	0.00978761	0	0.743858	0	0	0.0587257	0.0978761	0.00978761	0.00978761	0.0293628
114	Actinomyces	0	0.313203	0	0	0	0	0.0685133	0	0	0	0.0880885	0	0.0195752	0.0391504	0	0	0	0.929823	0	0	0	0	0.0391504	0	0.00978761	0	0.00978761	0.675345	0	0.0293628	0	0	0	2.89713	0	0	0	0	0	0	0	0	0.0195752	0.146814	0	0	0	0
115	Streptococcus	0	0.127239	0.166389	0.00978761	0	0	0	0	0.0391504	0.127239	0	0	0	0	0	0.0880885	0.0293628	0.048938	0.303416	0.0783009	0.00978761	0	0	0	0.0783009	0.538318	0	0	0	0.00978761	0.048938	0.185965	0.048938	0.675345	1.28218	0	0	0.0880885	0.0880885	0	0.107664	0.606832	0	0	0	0	0.0587257	0.176177
116	Actinomyces	0.528531	0	0.577469	0.0195752	1.0277	0	0.176177	0	0.0293628	0.195752	0.0880885	0	0.00978761	0	0	0.0195752	0.137027	0	0.313203	0.0293628	1.4975	0	0.0880885	0.00978761	0	0.626407	0.371929	0	0	0	0	0.0978761	0.146814	0	1.05706	0.0293628	1.33111	0.156602	0.00978761	0	0.303416	0.391504	0.303416	0	0	0	0.00978761	0.0783009
117	Streptococcus_constellatus	0	0	0.176177	0.0293628	0	0.0391504	0.0391504	0.420867	0.0195752	0.0391504	0.0195752	0	0	0.0587257	0	0.783009	0.00978761	0.0293628	0.371929	0.156602	0	0	0	3.68014	0.0880885	0.137027	0.0195752	0.0391504	0	0.362142	0.234903	0.176177	0.0195752	0.254478	0.557894	0.146814	0	0	0.176177	2.96565	0.0587257	0.0587257	0.0391504	0.0587257	0	0.127239	0.137027	0.156602
118	Prevotella	0	0.0391504	0.0880885	0.107664	0	0	0.0685133	0	0	0	0	0	0	0.0391504	0	0.117451	0	0.665557	0.322991	0.156602	0	0	0.93961	0	0.00978761	0	0	0.968973	0.048938	0	0	0.420867	0	0	0.0195752	0.0685133	0	0	0	0	0.185965	0	0.00978761	0	0.0195752	0.0587257	0	0
119	Actinomyces	0.00978761	0	0.606832	0	0	0	0.0391504	0	0.00978761	0	0	0	0	0	0	0	0.0195752	0	0.675345	0	0	0	0	0	0.048938	0	0	0	0	0	0	0	0.00978761	0	1.58559	0.0195752	0	0.127239	0.107664	0	0.117451	0	0	0	0	0	0	0
120	Prevotella	0	0	0.048938	0.225115	0	0	0.0391504	0	0.00978761	0	0	0	0	0.0293628	4.424	0	0	0	0.048938	0.41108	0	0	0	0	0.00978761	0	0	0	0	0.0195752	5.58872	0	0	0	0.0293628	0.117451	0	0	0	0	0.146814	0	0	0	0	0	1.07664	0
121	Actinomyces	0	0.0293628	0	0	0	0	0	0	0	0	0	0	0	0	0	0	0	0.20554	0	0	0	0	0	0	0	0	0	0.0293628	0.0293628	0	0	0	0	0.851522	0	0	0	0.303416	0	0	0	0.00978761	0	0	0	0.0880885	0	0
122	Streptococcus	0	0.0195752	0.0587257	0	0	0	0	0	0	0	0	0	0	0.00978761	0.048938	0.841734	0	0	0.0880885	0	0	0	0	0	0	0	0	0	0	0.00978761	0	5.63766	0	0.146814	0.0880885	0	0	0.00978761	0	0	0	0	0	0	0.00978761	0.0587257	0.048938	8.71097
123	Streptococcus_sanguinis	0.391504	0	0	0	0.0293628	0.0195752	0.048938	0	0.0391504	0	0.0195752	0	0.0587257	0.0293628	0.0293628	0	1.60517	0	0.00978761	0	0.00978761	0	0.0391504	0.303416	0.117451	0.127239	0.0978761	0.0685133	0.0195752	0.0880885	0.156602	0.0391504	0.851522	0	0.0293628	0	0	0.00978761	0.215327	0.381717	0	2.48605	0.24469	0.254478	0.176177	0.0195752	0.293628	0.0587257
124	Finegoldia_magna	0	0	0	0	0	0	0	0	0	0	0	0	0	0	0.0195752	0	0	0	0.00978761	0	0	0	0	0	0	0.00978761	0	0	0	0.00978761	0	0	0	0.0293628	0.0783009	0	0	0.117451	0	0	0	0	0	0.792796	0.127239	0.137027	0	0
125	Streptococcus	0.959186	0	0.0685133	0.048938	0.195752	0	0.00978761	0	0	0.127239	0	0	0.166389	0.293628	0	0	2.25115	0	0.127239	0.048938	0.0978761	0	0	0.00978761	0	0.185965	0	0.146814	0.195752	0.283841	0.0685133	0	1.15494	0	0.185965	0.048938	0.528531	0	0	0	0.048938	0.176177	0	0.0293628	1.00812	0.0391504	0.048938	0
126	Granulicatella_elegans	0	0	0.0195752	0	0	0	0.0685133	0	0.107664	0	0	0	0.0880885	0.0587257	0.0587257	0	0	0	0.0293628	0.00978761	0	0	0	0	0.0685133	0.0195752	0	0	0.0195752	1.09621	0.127239	0	0	0.0391504	0.00978761	0.0195752	0	0.0685133	0.0587257	0	0	0.00978761	0	0	0.0195752	0.557894	0.528531	0
127	Granulicatella	0.0195752	0.0195752	0.0195752	0.0195752	0.00978761	0.0880885	0.0391504	0.195752	0.0587257	0.00978761	0	0	0.0685133	0.0685133	0.00978761	0.381717	0.0587257	0.0391504	0.0293628	0.156602	0.0293628	0.156602	0	0.352354	0.264265	0.176177	0.0195752	0.0293628	0.0293628	0.45023	0.0587257	0.440442	0.0783009	0.303416	0.65577	0.0293628	0	0.274053	0.0685133	0.313203	0	0.107664	0.0293628	0	0.146814	0.0783009	0.41108	0.322991
128	Streptococcus	0	0	0	0	0	0	0.0685133	0	0.41108	0	0	0	0	0	0	0	0	0	0	0	0	0.00978761	0	1.38005	0.313203	0	0	0	0	0	0	0	0	0	0.0195752	0	0	0.0195752	0.469805	1.3409	0	0	0	0	0	0	0	0
129	Lachnoanaerobaculum	0	0.0685133	0	0.185965	0	0	0.117451	0	0	0	0.0685133	0	0.166389	0.0293628	0.127239	0	0	0.0685133	0	0.0293628	0.048938	0	0.822159	0	0	0	0.0391504	0.41108	0.176177	0.0293628	0.508956	0	0	0.00978761	0	0	0	0.00978761	0	0	0.00978761	0	0.0391504	0	0	0.0783009	0.0685133	0
130	Micrococcusluteus	0	0	0	0.0685133	0	0	0.0783009	0	0	0.00978761	0	0.322991	0	0	0.00978761	0	0	0	0	0	0.00978761	0	0	0	0	0	0	0	0	0.00978761	0.00978761	0	0	0.0391504	0.0293628	0.137027	0	0.665557	0.0195752	0	0.225115	0	0	2.94607	0	0.0195752	0	0.048938
131	Streptococcus	0	0	0.195752	0	0	0	0.146814	0	0	0	0.0587257	0	0.0587257	0	0	0.137027	0.0195752	0	0.0978761	0	0	0.00978761	0	0	0	0.00978761	0.117451	0.371929	0	0	0	0.763433	0.00978761	0	0.127239	0	0	0.0880885	0.00978761	0	0.0685133	0	0.264265	1.06685	0	0	0	1.16473
132	Streptococcus	0.146814	0	0.225115	0.332779	0.0880885	0	0.0685133	0.0978761	0.0880885	0	0.0293628	0	0.215327	0.0978761	0	0.0293628	0.0880885	0.00978761	0.166389	0.048938	0.0391504	0	0	0.156602	0.156602	0.00978761	0.00978761	0.0195752	0.166389	0.616619	0.00978761	0.048938	0.0195752	0.166389	0.508956	0.0391504	0.127239	0.0195752	0.264265	0.0783009	0.0880885	0	0	0	0.998336	0.264265	0	0.0685133
133	Lactobacillus_iners	0	0	0	0	0	0	0.0391504	0	0	0	0	0	0	0	0	0	0	0	0	0	0	0	0	0	0	0	0	0	0	0	0	0	0	0	0	0	0	0	0	0	0	0	0	0	0	0.00978761	0	0
135	Actinomyces	0	0	10.3847	0.0391504	0	0	0.127239	0.41108	0	0	0	0	0	0	0	0	0	0	1.63453	0	0	0	0	0.107664	0	0	0	0	0	0	0	0	0	0	5.88235	0	0	0.00978761	0	0.0783009	1.94773	0.00978761	0	0	0	0.00978761	0	0
136	Streptococcus	0	0	4.6589	0.0391504	0	0	0.0978761	0	0	0	0	0	0	0	0	0	0	0	3.60184	0	0	0	0	0	0	0	0	0.469805	0	0	0	0	0	0	5.42234	0	0	0	0	0	1.48772	0	0	0.274053	0	0	0	0
137	Treponema	0	2.18264	0.166389	0	0	0	0.0978761	1.53665	0	1.09621	0	0.0195752	0.00978761	0.215327	1.68347	4.13037	0	1.27239	0.146814	0	0.0391504	0	0.0195752	0.401292	0	0.00978761	0	0	0	0.90046	1.38984	1.56602	0	0	0	0	0.0195752	0.0293628	0	0.225115	0	0.00978761	0	0	0	0.00978761	0.0195752	0
138	Alloprevotella	0	0.420867	0	0	0	0	0	0	0	0	0.0195752	0.0195752	0.24469	0.0293628	0	8.45649	0	0.293628	0	0	0	0	0.0391504	0	0	0	0	0	1.24303	0	0	6.37173	0	0	0	0	0	0	0	0	0	0	0	0.420867	0	0.117451	0	0.0293628
139	Burkholderiales	0.313203	0.0195752	0	0.342566	0.146814	0	0.0587257	0.234903	0.0293628	0	0.24469	0	0.215327	0.0783009	0.303416	0	3.12225	0.0587257	0	0.264265	0.0391504	0	0.65577	0.146814	0.264265	0	0.41108	0.0293628	0.0685133	0.959186	0.851522	0.0391504	2.93628	0	0.0195752	0.215327	0	0	0.0195752	0.0685133	0	0	0.998336	0	0	0.0195752	0.577469	0.0783009
140	Streptococcus_infantis	0.24469	0.0783009	0	0.0195752	0.048938	0	0	0	0	0	0.0685133	0	0.332779	0.0391504	0.0978761	0	0.342566	0.283841	0	0	0.0293628	0	0	0	0.0195752	0	0.0880885	0	0.0391504	0.0587257	0.871097	0	0.225115	1.98688	0	0	0.117451	0.00978761	0.0391504	0	0	0	0.146814	0.00978761	0.460018	0.0587257	1.11579	0
141	Actinomyces	0	0.048938	0.00978761	0.577469	0.117451	0	0	0	0.0293628	0	0.156602	0.362142	0	0	0	0.048938	0	0.293628	0.00978761	0.107664	0.127239	0	0.0685133	0	0	0	0.0195752	0.606832	0	0	0	0.0587257	0.00978761	0.743858	0	0.322991	0.274053	0.0195752	0.0195752	0	0	0	0.146814	0.0391504	0	0	0	0.048938
142	Actinomyces	0.0195752	0	0.166389	2.01625	0.313203	0	0.166389	0	0.430655	0.048938	0.0880885	0	0	0.254478	0.0880885	0.137027	0.0783009	0.048938	0.0685133	0.0880885	0.636195	0	0.00978761	0	0.166389	0.107664	0.146814	0.137027	0	0.274053	0.0880885	0.0783009	0.0880885	0.0783009	0.156602	0.283841	0.176177	0.0391504	0.391504	0	0.048938	0.0880885	0.176177	0.0783009	0	0.0195752	0.0880885	0.0978761
143	Haemophilus	0.048938	4.31634	0	0	0.0978761	0.0685133	0.822159	0	0.127239	0.264265	0.00978761	0.0293628	0	0.783009	0.107664	0.0293628	0.0783009	0.283841	0	0	0.0391504	0.0587257	1.36048	0.00978761	0.048938	2.58393	0.0293628	0.048938	0.0195752	0.254478	0.234903	0.0293628	0.254478	0.0195752	0	0	0	0	0	0	0	1.66389	0.00978761	0	0.0685133	0.00978761	0.0293628	0.215327
144	Streptococcus	0.048938	0.0587257	0.0978761	0.0195752	0.00978761	0.146814	0.137027	0.479593	0	0	0.0391504	0	0.0978761	0	0	0.0880885	0.274053	0.00978761	0.303416	0.0783009	0.00978761	0.137027	0	0.469805	0.048938	0	0	0	0.0391504	0.0685133	0.0391504	0.195752	0.0880885	0.274053	0.665557	0	0.156602	0.24469	0.107664	0.812372	0.0783009	0	0.0391504	0	0.342566	0.0293628	0.0391504	0.274053
145	Helicobacter	0	0	0	0	0	0	0	0	0	0	0	0	0	0	0	0	0	0	0	0	0	0	0	0	0	0	0	0	0	0	0	0	0	0	0	0	0	0	0	0	0	0	0	0	0	0	0	0
146	Haemophilus	0.734071	0.822159	0.234903	1.25281	0.499168	0	0.156602	0.391504	0.401292	0.479593	0	0.0195752	0.0587257	0.0293628	0.117451	0.0293628	0.391504	0.156602	0.0685133	0.0783009	0.146814	0.0293628	0.00978761	0.24469	0.185965	3.03416	0	0.420867	0.0293628	0	0.048938	0	0.763433	0	0	0	0	0.00978761	0	0.048938	0	2.18264	0	0	0	0.0195752	0.127239	0.0195752
147	Streptococcus	0	0	0	0	0	0	0.00978761	0	0	0	0	0	0.0880885	0.00978761	0	0.00978761	0.00978761	0.00978761	0	0	0	0	0.0293628	0	0.0293628	0	0.00978761	0	0	0.0685133	0	0	0.00978761	0.0195752	0	0	0	0	0.176177	0	0	0	0.0293628	0	0.0391504	0.0195752	0	0.00978761
148	Ralstonia_pickettii_or_detusculanense	0	0	0	0	0	0	0	0	0	0	0	0	0	0	0	0	0	0	0	0	0	0	0	0	0	0	0	0	0	0	0	0	0	0	0	0	0	0	0	0	0	0.00978761	0	0.0195752	0	0	0	0
149	Alloprevotella	0	0.293628	0.166389	0.0685133	0	0	0.362142	0	1.62474	0.146814	0	0	0	0	0	0	0.0293628	0.332779	0	0.254478	0	0	0.0195752	0	0.254478	0	0	0	0.0195752	0	0	0	0	0	0.00978761	0.293628	0	0.0293628	0	0	0.0293628	0	0	0	0	0	0	0
150	Streptococcus	0	0	0.00978761	0.00978761	0	0	0.0293628	0	0.0587257	0.00978761	0	0	0	0.0195752	0	0	0.00978761	0	0	0.0293628	0	0.0293628	0	0	0.0783009	0.0195752	0	0	0	0	0.0293628	0	0.048938	0	0.0195752	0.0293628	0	0.0195752	0.313203	0	0	0.00978761	0	0	0	0.00978761	0.0391504	0
152	Streptococcus_anginosus	0.0293628	0.00978761	0.0391504	0	0.00978761	0	0.0685133	0	0	0	0	0	0.0391504	0	0.00978761	0	0	0.0685133	0.117451	0.00978761	0.0587257	0.176177	0.0195752	0.332779	0	0.048938	0.0293628	0	0.00978761	0.00978761	0.0195752	0.0293628	0	0.0587257	0.127239	0	0	0.0978761	0.00978761	0.528531	0	0.0783009	0	0	0.430655	0	0.117451	0.0587257
153	Streptococcus	0.0783009	0.0587257	0	0	0	0	0	0	0.00978761	0	0	0	0	0	0	0.0587257	0.332779	0.0783009	0.0391504	0.0195752	0	0	0	0	0.00978761	0	0	0	0	0	0.0880885	0.567681	0.342566	0.812372	0.0587257	0	0	0	0	0	0	0	0	0	0	0	0.127239	0.577469
154	Bacteroidesvulgatus	0	0.0978761	0	0	0	0	0.166389	0	0	0.0587257	0.00978761	0.00978761	0	0	0.0685133	0	0	0.0293628	0	0	0	0	0.00978761	0	0	0	0.0195752	0.0391504	0	0.0195752	0.137027	0	0	0.0293628	0	0	0.00978761	0.0195752	0	0	0	0.00978761	0	0.0978761	0.00978761	0	0.00978761	0
155	Delftia	0	0	0	0	0	0	0	0	0	0	0	0	0.00978761	0	0.0195752	0	0	0	0	0.00978761	0	0	0	0.117451	0	0	0	0	0	0	0.0293628	0	0	0	0	0.00978761	0	0.0587257	0	0.0293628	0.107664	0	0	0.0685133	0	0.0195752	0	0
156	Streptococcus	0	0	0	0	0.0293628	0	0.24469	0	0	0	0	0	0	0	0	0	0	0	0	0.00978761	0	0	3.03416	0	0	0	0	0	0	0	0	0	0	0	0	0	0	0	0	0	1.91837	0	0	0	0	0	0	0
157	Streptococcus_mitis_or_pneumoniae	0.00978761	0.0880885	0	0	0	0	0	0	0	0	0.166389	0.00978761	0.0685133	0.24469	0	0	0	0.107664	0	0	0	0	0	0	0.00978761	0	0.274053	0.0293628	0	0.499168	0	0	0	0.283841	0.00978761	0	0	0	0.0391504	0	0	0	0.303416	0	0.0195752	0.146814	0	0
158	Streptococcus	0	0	0.0880885	0	0	0.00978761	0.048938	0	0	0	0	0	0	0	0	0	0	0	0.0587257	0	0.0880885	0.0783009	0	0	0	0.0391504	0	0	0	0.0391504	0	0	0	0	0.00978761	0	0.264265	0.0978761	0	0	0	0.0293628	0	0	0.00978761	0.0587257	0	0
159	Staphylococcus	0	0	0	0.0880885	0	0.0391504	0.137027	0	0	0	0	0.234903	0	0	0.0195752	0.00978761	0	0	0	0	0	0	0	0	0	0	0	0	0	0	0	0	0	0.0195752	0.0783009	0.352354	0.156602	0.303416	0	0	1.95752	0	0.0195752	0.283841	0.0293628	0.0293628	0.0195752	0
160	Fusobacterium_nucleatum	0.0195752	0.107664	0.0880885	0.0195752	0.048938	0	0	0	0.0195752	0.048938	0.45023	0	0	0.137027	0.00978761	0.176177	0.00978761	1.76177	0.0783009	0.0587257	0.264265	0	0	0.0195752	0.24469	0	0.890672	0	0	0.264265	0.0587257	0.430655	0	0.508956	0	0	0	0.0195752	0	0.0978761	0	0.048938	0.146814	0	0	0	0.0293628	0.215327
161	Treponema	0.00978761	0.636195	0.254478	0	0.0195752	0.0293628	0.0783009	3.68993	0.45023	0	0.0195752	0.0195752	0	0.0195752	0.538318	0	0.0978761	0.283841	0.195752	0	0.185965	0	0.381717	2.28051	0.332779	0	0	0	0	0	1.14515	0	0.0195752	0	0.0391504	0	0.00978761	0.127239	0	0.567681	0	0	0.00978761	0	0	0	0.0391504	0
162	Leptotrichia	0	0.00978761	0	0	0	0.00978761	0	0	0.0195752	0	6.10747	0	0	0.0195752	0	0	0	0	0	0	0	0	0	0.508956	0.0880885	0	2.10434	0	0	0.274053	0	0	0	0	0	0	0	0	0	1.75198	0	0	2.66223	0	0	0	0.0195752	0
163	Streptococcus_australis	0	0	0	0	0	0	0	0	0	0	0.0880885	0	0.00978761	0.0685133	0	0	0	0.00978761	0	0	0	0	0	0	0	0	0.107664	1.11579	0	0.0293628	0.0293628	0	0.00978761	0	0	0	0	0.00978761	0	0	0	0	0.117451	0.538318	0	0.0293628	0.0293628	0
164	Streptococcus	0.00978761	0	0.0391504	0	0.0587257	0.0587257	0.313203	0	0	0	0.176177	0	0.0783009	0	0	0	0.0880885	0	0.156602	0	0.117451	1.30175	0	0	0	0	0.127239	0.146814	0	0.381717	0	0.0293628	0.0293628	0.0880885	0.274053	0.00978761	0.234903	0.65577	0	0	0	0	0.264265	0.048938	0.0391504	0.322991	0	0.0587257
165	Actinomyces	0.00978761	0	0.00978761	0.00978761	0	0	0.0195752	0	0	3.18097	0	0	0	0	0.0293628	0	0	0	0	0.0391504	0	0	0	0	0	2.57414	0	0	0	0	0	0	0	0	0.00978761	0.0391504	0	0	0	0	0.117451	1.76177	0	0	0.00978761	0	0	0
166	Parvimonas	0	0	0	0	0	0	0	0	0.00978761	0	0	0	0.00978761	0.00978761	0.00978761	0	0	0	0	0	0	0	0	0	0.0391504	0	0	0	0	0.00978761	0.234903	0	0	0.0293628	0	0	0	0	0	0	0	0	0	0	0	0	0.362142	0
167	Streptococcus	0	0	0.0195752	0.0685133	0.00978761	0.0293628	0.048938	0.0195752	0.557894	0	0	0.00978761	0.107664	0.0293628	0	0	0.00978761	0.0293628	0	0.00978761	0.0195752	0.0587257	0.0685133	0.00978761	0.48938	0.0293628	0	0.254478	0.0293628	0.0880885	0	0.0195752	0	0.0783009	0.0685133	0	0	0.0391504	0.65577	0	0	0	0	0.20554	0.616619	0.0685133	0	0
168	Actinomyces	0.185965	0.00978761	0.137027	0.137027	0.548106	0	0.137027	0	0.0195752	0.773221	0	0	0	0	0	0.0293628	0.0685133	0.0195752	0.234903	0.185965	0.528531	0.166389	0	0.00978761	0.0195752	0.45023	0	0	0	0.0195752	0.0293628	0.0391504	0.0685133	0.0391504	0.831947	0.391504	0.127239	0.0685133	0.0391504	0	0.0685133	0.283841	0	0	0	0	0.00978761	0.0293628
169	Streptococcus	0.597044	0	0.0783009	0.00978761	0.41108	0.675345	0.0783009	0	0	0.293628	0	0	0	0	0	0	0.225115	0	0.0880885	0	0.24469	0.538318	0	0.00978761	0	0.156602	0	0	0	0	0	0	0.137027	0	0.391504	0	0.45023	0.371929	0	0.0685133	0.0587257	0.0685133	0	0	0	0	0	0
170	Escherichia_or_Shigella	0	0	0	0	0	0	0.00978761	0	0	0.0293628	0	0	0	0	0	0	0	0	0	0	0	0.0293628	0	0	0	1.30175	0	0	0	0	0	0	0	0.0195752	0	0	0	0	0	0	0	0.90046	0	0	0	0	0	0
171	Streptococcus	0	0.00978761	0	0.0293628	0	0	0.0293628	0	0.215327	0	0.293628	0	0	0.0783009	0	0.0587257	0	0.00978761	0	0	0	0	0	0	0.93961	0	0.264265	0	0	0.048938	0	0.0195752	0	0.0685133	0	0	0	0	0.802584	0	0	0	0.910248	0	0	0.0293628	0	0
173	Corynebacterium	0	0	0	0	0	0.0195752	0.048938	0	0	0	0	3.96398	0	0	0.0293628	0.00978761	0	0	0	0	0	0	0	0	0	0	0	0	0	0	0	0	0	0	0.107664	0.0293628	0	0.0685133	0	0	0.0783009	0	0.0391504	0.391504	0.00978761	0	0.0293628	0.0195752
174	Helicobacter_pylori	0	0	0	0	0	0	0	0	0	0	0	0	0	0	0	0	0	0	0	0	0	0	0	0	0	0	0	0	0	0	0	0	0	0	0	0	0	0	0	0	0	0	0	0	0	0	0	0
175	Fusobacterium	0	0	0	0	0	0	0	0	0	0	0	0	0	0	0	2.39796	0	0	0	0	0	0	0	0	0	0	0	0	0	0	1.78134	2.99501	0	0	0	0	0	0	0	0	0	0	0	0	0	0	0.0293628	0.322991
176	Paracoccus_yeei	0	0	0	0	0	0	0.0685133	0	0	0	0	0	0	0	0	0	0	0	0	0	0	0	0	0	0	0	0	0	0	0	0	0	0	0	0	0.0783009	0	0.00978761	0.00978761	0	0.225115	0	0.00978761	0.0195752	0	0	0	0
177	Actinomyces	0	0	0.00978761	0	0	0	0.00978761	0	0	0	0	0	0.00978761	0.117451	0	0	0	0	0	0	0	0	0	0	0	0	0	0.968973	0	0	0	0	0	0	0	0	0	0.127239	0	0	0	0	0	0.401292	0.00978761	0.00978761	0	0.00978761
178	Streptococcus	0	0	0	0	0	0	0	0	0	0	0	0	0	0	0.00978761	0	0	0	0	0	0	0	0	0	0	0	0	0	0	0	0.00978761	0	0.00978761	0	0	0	0	0	0	0	0	0	0	0	0	0	0.048938	0
179	Fusobacterium	0	0.00978761	0.0978761	0	0	0	0	0	0	0.0293628	0	0	0.00978761	0	0	0	0.0293628	0.107664	0.166389	0.0783009	0.0195752	0	0	0.00978761	0	0.313203	0	0	0.00978761	0	0.303416	0	0	0.0293628	0	0	0	0	0	0.0293628	0	0.117451	0	0	0	0	0.0195752	0
180	Modestobacter	0	0	0	0	0	0	0	0	0	0	0	0	0	0	0.00978761	0	0	0	0	0	0	0	0	0	0	0	0	0	0	0	0	0	0	0	0	0	0	0	0	0	0	0	0	0	0	0	0	0
181	Leptotrichia	0	0.45023	0	0	0	0	0	0	0	0	1.08642	0	0	0	0	0	0	3.318	0	0	0	0	0	0	0	0	0.107664	0	0	0	0	0	0	1.42899	0	0	0	0	0	0	0	0	0.176177	0	0	0	0	0
182	Lachnoanaerobaculum	0.0783009	0	0.0685133	0	0.0391504	0	0.048938	0.0587257	0.0195752	0	0	0	0.127239	0	0.00978761	0.0391504	0.0880885	0.0391504	0.185965	0.0195752	0.0880885	0	0	0.293628	0.20554	0	0	0	0.0391504	0.401292	0.24469	0.20554	0.0587257	0.048938	0	0.048938	0	0.0783009	0.00978761	1.21366	0	0	0	0	0	0	0.0391504	0.117451
183	Actinomyces	0	0	0	0	4.54145	0	0.107664	0	0	0.00978761	0	0	0	0	0	0	0	0	0	0.0293628	3.17119	0	0	0	0	0.0195752	0	0	0	0	0	0	0	0	0	0.00978761	3.96398	0.264265	0	0	0.117451	0.00978761	0	0	0	0	0	0
184	Lactobacillus	0	0	0	0	0	0	0	0	0	0	0	0	0	0	0	0	0	0	0	0	0.176177	0	0	0	0.00978761	0	0	0	0	0.048938	0	0	0	0	0	0	0	0	0	0	0	0	0	0	0	0	0	0
185	Streptococcus	0.743858	0	0.665557	0.107664	0	0	0.0685133	0.0783009	0.0391504	0	0	0	0	0	0	0	1.04727	0	0.156602	0.00978761	0	0	0	0.518743	0.048938	0	0	0	0	0.00978761	0	0.00978761	0.420867	0	0.675345	0.0978761	0.00978761	0	0.0293628	0.557894	0.117451	0	0	0	0	0	0	0.00978761
186	Alloprevotella_rava	0	0.0293628	0.0293628	0	0	0	0	0	0	0	0	0	0	0.137027	0.166389	0.0195752	0	0.00978761	0.0783009	0	0.048938	0	0	0	0	0	0	0	0	0.352354	0.0880885	0	0	0	0	0	0	0.0293628	0	0	0	0	0	0	0	0	0.127239	0
187	Dermacoccus_nishinomiyaensis	0	0.048938	0	0	0	0	0.0195752	0	0	0	0	1.07664	0	0	0.0880885	0	0	0	0	0	0	0	0	0	0	0.0195752	0	0	0	0	0	0	0	0.0195752	0.156602	0.362142	0	0.225115	0	0	0.831947	0	0.00978761	0.469805	0	0.0587257	0.0195752	0
188	Fusobacteriales	0	0	0	0	0	0	0	0	0	0	0	0	0.0685133	0.048938	0	0	0	0	0	0	0	0	0	0	0	0	0	0	0	0.0587257	0	0	0	0	0	0	0	0	0	0	0	0	0	0	0.0195752	0	0	0
189	Enhydrobacter	0	0	0	0	0	0	0	0	0	0	0	0	0	0	0	0	0	0	0	0	0	0	0	0	0	0.048938	0.00978761	0	0	0	0	0	0	0	0.0293628	0.0293628	0	0.00978761	0.00978761	0	0.24469	0	0	2.65244	0	0.0195752	0	0.00978761
190	Actinomyces_odontolyticus	0	0	0	0	0	0	0	0	0	0	0	0	0	0	0	0	0	0	0	0	0	0	0	0	0	0	0	0.00978761	0	0	0	0	0	0	0	0	0	0	0	0	0	0	0	0	0	0	0	0
191	Staphylococcus_hominis	0	0	0	0	0	0	0.048938	0	0	0	0	0	0	0	0	0	0	0	0	0	0	0	0	0	0	0	0	0	0	0	0	0	0	0.00978761	0.0293628	0.0195752	0	0	0	0	0.342566	0	0	0.0685133	0	0.00978761	0	0.0783009
192	Streptococcus	0	0	0.0195752	0.0293628	0	0	0	0	0.0195752	0	0	0	0.185965	0	0	0	0	0	0.00978761	0	0	0	0	0	0	0	0	0	0.0880885	0	0	0	0	0	0.00978761	0	0	0	0	0	0	0	0	0	0.313203	0	0	0
193	Propionibacterium_granulosum	0	0.0195752	0	0	0	0.0293628	0.048938	0	0	0	0	0	0	0.0195752	0	0	0	0	0	0	0	0	0	0	0	0	0	0	0	0	0	0	0	0.0293628	0.0293628	0.137027	0	0.0685133	0.0195752	0	0.303416	0	0	0.24469	0.0293628	0.00978761	0	0
194	Streptococcus	0.00978761	0	0	0	0	0	0.0391504	0	0	0	0.0391504	0	0	0.20554	0	0.65577	0	0	0	0	0	0	0	0	0	0	0.00978761	0.0880885	0	0.0880885	0	0.137027	0.0195752	0	0	0	0	0	0.00978761	0	0	0	0.0880885	0	0	0.0783009	0.00978761	0.24469
195	Lactobacillus_fermentum	0	0	0	0	0.0685133	0.00978761	0.0293628	0	0	0.0391504	0	0	0	0	0	0	0	0	0	0	0.185965	0.107664	0	0	0	0.127239	0	0	0	0	0	0.00978761	0	0	0	0	0.185965	0.048938	0	0	0	0.0195752	0	0	0	0	0	0.048938
196	Campylobacter	0	1.00812	0.528531	0	0	0	0.0978761	0	0	0	0	0.00978761	0	0	0	0	0	1.106	3.03416	0	0	0	0	0.0978761	0	0	0	0	0	0	0	0	0	0	0	0.0391504	0	0.0293628	0	0.137027	0	0	0	0	0	0	0	0
197	Leptotrichia	0.0195752	0.0587257	0.00978761	0.00978761	0.0391504	0.00978761	0	0	0.0587257	0	0.0978761	0	0.00978761	0	0	0.0978761	0.0195752	0.322991	0.00978761	0.146814	0.342566	0	0	0.812372	0.137027	0	0.0195752	0	0	0.381717	0.146814	0.127239	0.0293628	0.45023	0.00978761	0	0	0.0587257	0	2.42733	0	0	0.137027	0	0	0.0391504	0.0195752	0
198	Variovorax	0	0.00978761	0	0	0	0	0.0195752	0	0	0.0195752	0	0	0	0	0.0195752	0	0.00978761	0	0	0	0	0	0	0	0	0	0	0	0	0	0	0	0	0	0.0880885	0	0	0	0.048938	0	0.117451	0.00978761	0	0.0783009	0.0195752	0	0	0.0195752
199	Actinomyces	0.00978761	0	0.0293628	0.0783009	0.127239	0.117451	0.0978761	0	0.0685133	0.254478	0	0	0.156602	0.00978761	0	0.048938	0	0	0.048938	0.176177	0.303416	0.0587257	0	0.0195752	0.00978761	0.0685133	0	0.0685133	0.0978761	0.0880885	0	0.0880885	0	0	0.0978761	0.0783009	0.24469	0.166389	0.0587257	0.00978761	0.0587257	0.0783009	0	0	0.185965	0	0.0391504	0
200	Streptococcus_gordonii	0.00978761	0	0.0195752	0	0	0.00978761	0	0	0.00978761	0	0	0.048938	0.107664	0	0	0	0.107664	0.0195752	0.0685133	0.00978761	0	0	0	0.322991	0.0880885	0.0685133	0	0.00978761	0	0.0195752	0.0685133	0.0195752	0.0880885	0.0685133	0.146814	0	0.0293628	0	0.195752	0.508956	0	0.00978761	0	0	0.0880885	0.00978761	0.0587257	0.00978761
201	Mycoplasma	0	1.51708	0.274053	0	0.0293628	0	0.20554	5.71596	0	0	0.0195752	0.0293628	0	0	0	0	0	0.430655	0.283841	0	0.0195752	0	0.048938	1.19409	0	0	0	0	0	0	0	0	0	0	0	0	0	0.137027	0	0.675345	0	0	0.00978761	0	0	0	0	0
202	Prevotella	0	0	0	0.0587257	0	0	0	0	0	0	0.00978761	0	0	0.0587257	0.0783009	0	0	0	0	0.0195752	0	0	0	0	0	0	0.00978761	0	0	0	0.107664	0	0	0	0	0	0	0	0	0	0	0	0.0195752	0	0	0	0.107664	0
203	Gemella	0	0	0	0	0.117451	0.528531	0.215327	0.0978761	0	0.048938	0	0	0	0	0	0	0	0	0	0	0.117451	1.58559	0	0.264265	0	0.127239	0	0	0	0	0	0	0	0	0	0	0.146814	0.645982	0	0.234903	0	0.185965	0	0	0	0	0	0
204	Lactobacillus_salivarius	0	0.00978761	0.0195752	0	0.156602	0	0	0	0	0.0391504	0	0	0	0	0	0	0.00978761	0	0.00978761	0	0.342566	0	0	0	0	0.0293628	0	0	0.00978761	0	0.0293628	0	0	0	0	0	0.264265	0	0	0.0293628	0.117451	0	0	0	0	0	0	0
205	Prevotella	0	0	0	0	0	0	0	0	0	0	0.0195752	0	0.00978761	0	1.01791	0	0	0	0	0	0	0	0	0	0	0	0	0	0	0.0195752	1.71283	0	0	0	0	0	0	0	0	0	0	0	0	0	0	0	0.24469	0
206	Prevotella	0.0587257	0	0.225115	0	0.00978761	0	0	0	0	0	0.0195752	0	0	0	0	0.0685133	0.20554	0	0.107664	0	0.225115	0	0.00978761	0	0	0	0.00978761	0	0	0.0293628	0	0.303416	0.254478	0	0	0	0	0.00978761	0	0	0	0	0.0587257	0	0	0	0	0
208	Eubacterium_nodatum	0	0.00978761	0.0391504	0	0	0	0	0	0	0	0	0	0	0	0.0880885	0	0	0.783009	0.176177	0	0	0.00978761	0.0195752	0.469805	0	0.107664	0	0	0	0.24469	0.264265	0	0	2.49584	0.048938	0	0	0	0	0.24469	0	0.0880885	0	0	0.00978761	0.0195752	0.166389	0
209	Prevotella	0	0	0	0	0	0	0.185965	0	0	0	0	0	0	0	0	0	0	0	0	0	0	1.1843	0	0	0	0	0	0	0	0	0	0	0	0	0	0	0	0.127239	0	0	0	0	0	0	0	0	0	0
210	Streptococcus_infantis	0.0783009	0.00978761	0	0.0293628	0	0	0	0	0.048938	0	0.890672	0	0.117451	0.00978761	0	0.00978761	0.0978761	0.00978761	0	0	0	0	0	0	0.0195752	0	0.920035	0	0.0293628	0.0685133	0	0.0391504	0.146814	0	0	0	0	0	0.0978761	0	0	0	1.85965	0	0.0978761	0.0391504	0	0.0587257
211	Bacteroides_uniformis	0	0	0	0	0	0	0.645982	0	0	0.0391504	0	0.0685133	0.00978761	0.0195752	0	0	0	0.0195752	0	0	0	0	0	0	0	0.0293628	0	0.00978761	0.00978761	0.00978761	0.0195752	0	0	0.0685133	0.048938	0	0	0.0880885	0	0	0	0	0.0685133	1.24303	0.0195752	0.048938	0.00978761	0
212	Fusobacterium_nucleatum	0.00978761	0.0685133	0	0	0.00978761	0.0391504	0.41108	0	0	0	0.00978761	0	0.00978761	0.0587257	0	0.0293628	0.107664	0.313203	0	0	0.127239	1.29196	0.0880885	0	0.0783009	0	0	0.303416	0.00978761	0.234903	0.00978761	0.0391504	0.0293628	0.0195752	0	0	0	1.07664	0	0	0	0	0	0.00978761	0.00978761	0	0	0.0391504
213	Alloprevotella	0	7.47773	0	0	0	0	0.0391504	0	0	0.401292	0.41108	0.0978761	0	0	0.332779	0.00978761	0	1.44857	0	0	0	0	0	0.00978761	0	0.0195752	1.15494	0	0	0.0195752	0.185965	0.0391504	0	0	0	0	0	0	0	0.00978761	0	0	0.274053	0	0	0	0.107664	0
214	Porphyromonas	0	0.0195752	0	0.234903	0.0195752	0	0.0587257	0.24469	0.0783009	0	0	0	0.283841	0.00978761	0	0	0.0685133	0.665557	0	1.73241	0.636195	0	0	1.14515	0.0880885	0	0	0	0.665557	0.20554	0	0	0.0685133	0	0.0587257	1.12558	0.00978761	0.0587257	0.00978761	0.773221	0	0	0	0	0	0.00978761	0	0
215	Streptococcus_rubneri	0	0.146814	0	0	0	0	0	0	0	0	0.156602	0	0	0	0	0	0	0.225115	0	0	0	0	0	0	0	0	0.127239	0	0	0	0	0	0	1.27239	0	0	0	0	0	0	0	0	0.225115	0	0	0	0	0
216	Olsenella	0	0	0.528531	0.00978761	0.00978761	0	0.0195752	0	0	0	0	0	0.0587257	0	0	0.0195752	0.0195752	0.264265	0.048938	0.0783009	0.176177	0	0.0195752	0.0880885	0.0978761	0.469805	0	0.0391504	0.0293628	0.0587257	0.176177	0.0293628	0.0293628	1.2626	0.176177	0	0.176177	0.0391504	0	0.24469	0	0.0195752	0.00978761	0	0.548106	0.0195752	1.07664	0.225115
217	Leptotrichia_hofstadii	0.362142	0	0.0195752	0	0.0195752	0	0	0	0	0.0293628	0	0	0	0.0195752	0.0685133	0.127239	0.166389	0	0	0	0.0880885	0	0	0.871097	0	0.0391504	0	0.0685133	0	0.381717	0.234903	0.479593	0.156602	0.0293628	0.0195752	0	0	0	0	0.90046	0	0.0587257	0	0	0	0.0293628	0	0.0783009
218	Enterococcus_cecorum	0	0	0	0	0	0	0	0	0	0	0	0	0	0	0	0	0	0	0	0	0	0	0	0	0	0	0	0	0	0	0	0	0.0195752	0	0	0	0	0	0	0	0	0	0	0	0	0	0	0
219	Alloprevotella	0	3.35715	0	0	0	0	0	0	0	0	0.0685133	0.0685133	0	0	0	0	0	6.80239	0	0	0	0	0	0	0	0	0	0	0	0	0	0	0	0.0685133	0	0	0	0	0	0	0	0	0	0	0.0391504	0	0	0
220	Streptococcus_anginosus	0.0293628	0	0	0.048938	0	0	0.048938	0.322991	0	0	0	0	0.0195752	0	0	0.00978761	0	0	0	0.45023	0.0195752	0.0587257	0	1.40942	0.0293628	0	0	0	0	0	0	0.0880885	0	0.00978761	0.00978761	0.107664	0.0587257	0.0293628	0.00978761	0.959186	0	0.0293628	0.00978761	0	0.0685133	0	0	0.127239
221	Parvimonas	0	0.0783009	0	0	0	0	0	0	0	0	0.381717	0	0	0	0	0	0	0.518743	0	0	0	0	0	0	0	0	0.322991	0	0	0	0	0	0	2.75032	0	0	0	0	0	0	0	0	0.225115	0.00978761	0	0	0	0
222	Streptococcus	0	0.00978761	0	0	0	0	0.0293628	0	0	0	0	0	0	0	0	0	0	0.0195752	0	0	0	0	0	0	0	0	0	0.048938	0	0	0	0	0	0.117451	0	0	0	0	0	0	0	0	0	0.0391504	0	0	0	0
223	Synergistaceae	0	0.763433	0	0.0293628	0	0	0.0195752	0.0587257	0	0.0783009	0	0	0.557894	0	0	0	0	0.460018	0	1.25281	0.048938	0	0	0.156602	0	1.19409	0	0	0.381717	0	0.0195752	0	0.0195752	0	0	1.20388	0	0	0	0.0978761	0	0.048938	0.00978761	0	0	0.0195752	0	0
224	Leptotrichia	0	0	0	0	0	0	0	0	0	0	0	0	0	0	0	0	0	0	0	0	0	0	0	0	0	0	0	0	0	0	0	0	0	0	0	0	0	0	0	0	0	0	0	0	0	0	0	0
225	Tannerella_forsythia	0	0.352354	0.048938	0	0.0587257	0	0.0391504	0.264265	0.185965	0.048938	0.0195752	0	0.117451	0	0.127239	0	0.0587257	1.29196	0.293628	0	0.460018	0	1.07664	0.675345	0.606832	0	0.00978761	0.0391504	0.626407	0.0195752	1.48772	0	0.00978761	0.00978761	0	0.0195752	0	0.048938	0.0391504	0.332779	0	0	0.00978761	0	0.00978761	0.048938	0.137027	0
226	Prevotella	0	2.51542	0.254478	0	0	0	0.0587257	0	0	0	0	0.0587257	0	0	0	0	0	0.195752	0.185965	0	0	0	0	0	0	0	0	0	0	0	0	0	0	0	0	0	0	0	0	0	0.0685133	0	0	0	0	0.00978761	0	0
227	Lactobacillus_ultunensis	0	0	2.11412	0	0	0	0.0195752	0	0	0	0	0	0	0	0	0	0	0	0.166389	0	0	0	0	0	0	0	0	0	0	0	0	0	0	0	0.567681	0	0	0	0	0	0.137027	0	0	0	0	0	0	0
228	Leptotrichia	0.195752	0	0.00978761	0.00978761	0.117451	0.352354	0.195752	0	0.0293628	0.0195752	0.00978761	0	0.0195752	0.0195752	0	0.0587257	0.0391504	0	0.0195752	0	0.0880885	0.538318	0	0.215327	0.0293628	0.0587257	0	0.00978761	0.00978761	0.0880885	0.048938	0.0978761	0.00978761	0	0	0	0	0.176177	0	0.362142	0	0.322991	0	0	0	0.0391504	0.0293628	0.107664
229	Enhydrobacter	0	0	0	0	0	0	0.0195752	0	0	0	0	0	0	0	0	0	0	0	0	0	0	0	0	0	0	0	0	0	0	0	0	0	0	0	0	0	0	0	0	0	0	0	0	0.0195752	0	0	0	0
230	Streptococcus	0	0	0	0.86131	0	0	0	0	0	0.00978761	0	0	0.00978761	0.0293628	0	0	0	0	0	0.20554	0	0	0	0.0195752	0.00978761	0.00978761	0	0	0	0	0	0	0	0	0	0.185965	0.0587257	0	0	0.00978761	0	0	0	0	0	0	0	0
231	Streptococcus	0	0	0	0.00978761	0	0	0	0	0	0	0.00978761	0	0.0195752	0.0195752	0	0	0	0	0	0.00978761	0	0	0	0	0	0	0.0880885	0.00978761	0	0	0.048938	0.00978761	0.0195752	0	0.00978761	0	0	0	0	0.00978761	0	0	0.176177	0	0	0	0.0783009	0
232	Actinomyces	0	0.0195752	0.0293628	0.00978761	0	0	0	0	0.0195752	0.00978761	0.00978761	0.0195752	0	0	0	0	0	0	0.137027	0.0195752	0.0391504	0	0	0	0.0195752	0.0880885	0.0293628	0	0	0.185965	0.0195752	0	0	0.00978761	0.460018	0	0	0.0195752	0.0978761	0	0.322991	0.0587257	0.0293628	0	0	0.0391504	0.048938	0
233	Lactobacillus_kalixensis	0	0	0.293628	0	0	0	0	0	0	0	0	0	0	0	0	0	0	0	1.43878	0	0	0	0	0	0	0	0	0	0	0	0	0	0	0	1.106	0	0	0	0	0	0.0391504	0	0	0	0	0	0	0
234	Actinomyces	0.185965	0	0.0293628	0.0293628	0.0783009	0.0391504	0.048938	0.440442	0	0.0195752	0	0	0.0978761	0	0	0	0.48938	0	0.0783009	0.0293628	0.303416	0.322991	0	0.156602	0.0685133	0.283841	0	0	0.00978761	0.0391504	0.0195752	0	0.48938	0	0.048938	0.0195752	0.479593	0.234903	0.0293628	0.24469	0.0391504	0.195752	0	0.0195752	0.0293628	0	0.0195752	0
235	Lachnoanaerobaculum_umeaense	0	0.234903	0	0	0	0	0	0	0	0	0.00978761	0	0	0	0	0	0	1.1843	0	0	0	0	0	0	0	0	0	0	0	0	0	0	0	0.998336	0	0	0	0	0	0	0	0	0	0	0	0	0	0
236	Streptococcus	0	0.587257	0.0391504	0	0.0587257	0	0	0	0.0293628	0	0	0.0195752	0.69492	0	0	0.215327	0.0195752	0.0391504	0.00978761	0	0	0	0	0	0.0195752	0	0	0	0.0685133	0.00978761	0	0.0880885	0	0.949398	0.127239	0	0	0	0.0293628	0.00978761	0	0	0.00978761	0	0.871097	0.0685133	0	0.146814
237	Pasteurellaceae	0	0.0685133	0	0	0	0	0	0	0	0	0	0	0.499168	0	0.0587257	0.00978761	0	0	0	0	0	0	0	0	0	0	0	0	0.176177	0	0.0978761	0.137027	0	0	0	0	0	0	0	0	0	0	0	0	0	0.0391504	0.107664	4.45336
238	Escherichia_or_Shigella	0	0	0	0	0	0	0.0391504	0	0	0	0	0	0	0	0	0	0	0	0	0	0	0.0880885	0	0	0	0.665557	0.00978761	0.0195752	0	0	0	0	0	0.00978761	0	0	0	0	0	0	0	0.371929	0	0.127239	0	0	0	0
239	Leptotrichia	0	0	0.469805	0	0.0293628	0	0.107664	0	0	0	0	0	0.00978761	0	0	0	0	0	0.0587257	0	0.00978761	0	0.978761	0	0	0	0	0	0	0	0	0	0	0	0	0	0	0	0	0.00978761	0	0	0	0	0	0	0	0
240	Prevotella	0	0	0.176177	0.00978761	0	0	0	0	0	0	0	0	0.0685133	0.176177	0	0	0	0	0.322991	0.00978761	0	0	0	0	0	0	0	0	0	0.871097	0	0	0	0	0	0	0	0	0	0	0	0	0	0	0.00978761	0	0.00978761	0.0195752
241	Actinomyces	0	0.0391504	0	0	0.0293628	0	0.0195752	0	0	0	0	0	0.420867	0	0	0	0	0.176177	0	0	0.00978761	0	0.0195752	0	0	0	0	0	0.0195752	0	0	0	0	0.45023	0	0	0	0	0	0	0	0	0	0	0.156602	0.00978761	0	0
242	Streptococcus	0	0	0.0391504	0.185965	0	0	0.00978761	0	0	0	0	0	0	0	0	0	0	0	0.0195752	1.35069	0	0	0	0	0	0	0	0	0	0	0	0	0	0	0.0293628	1.33111	0	0	0	0	0	0	0	0	0	0	0	0
243	Veillonella	0.0195752	0.0195752	0.332779	0.0391504	0.371929	0.0391504	0.0978761	0	0.0195752	0.0293628	0	0	0.274053	0.185965	0	0.00978761	0.283841	0	0.626407	0.0195752	0.0293628	0.0195752	0.176177	0	0.00978761	0.0195752	0	0.00978761	0.0783009	0.048938	0	0.0391504	0.048938	0.0195752	0	0.0587257	0	0.0293628	0	0	0	0.00978761	0	0	0.00978761	0	0	0
244	Leptotrichia	0	0	0.0685133	0	0.156602	0.00978761	0	0	0	0	0	0	0	0.0587257	0	0	0.048938	0.0391504	0.0391504	0.00978761	0.606832	0	0	0.381717	0.0587257	0	0	0	0	0.704708	0.0880885	0	0.0293628	0	0.0293628	0	0	0.00978761	0	0.479593	0	0	0	0	0	0.0685133	0.00978761	0
245	Actinomyces	0	0	0	0	0	0	0	0	0	0	0	0	0.048938	0	0	0	0	0	0	0	0	0	0	0	0	0.0293628	0	0	0.00978761	0	0	0	0	0	0.0195752	0	0	0.00978761	0.0391504	0	0	0.0293628	0	0	0.0783009	0.0195752	0	0.0195752
246	Mycoplasma_salivarium	0	0.0587257	0.0880885	0.352354	0.0195752	0	0.0293628	0.0391504	0.048938	0.156602	0	0	0.0391504	0.0293628	3.29842	1.2626	0	0	0.0685133	2.12391	0.00978761	0	0	0.0978761	0.0880885	0	0	0	0.528531	0.0391504	0.499168	0.137027	0	0	0.048938	0.508956	0	0.0195752	0	0.0195752	0	0	0	0	0.0391504	0.0195752	0.00978761	1.106
247	Streptococcus	0	0	0	0.048938	0	0	0	0	0.107664	0	0	0	0	0.146814	0.0195752	0	0	0	0	0	0	0	0	0	0.146814	0	0.00978761	0	0	0.0587257	0	0	0	0	0	0	0	0	0.195752	0	0	0	0	0	0	0.00978761	0	0
248	Prevotella_denticola	0.0391504	0.0685133	0.479593	0	0	0	0	0.0293628	0	0	0.00978761	0	0	0.00978761	0	0	0.0783009	0.137027	0.215327	0	0	0	0.00978761	0.146814	0.00978761	0	0.0195752	0.0880885	0	0	0.166389	0.0587257	0.225115	0	0.0195752	0	0	0.0195752	0	0.332779	0	0	0.0293628	0	0	0	0.048938	0
249	Streptococcus_sanguinis	0.048938	0	0	0	0	0	0	0	0.00978761	0	0.00978761	0	0	0	0.0391504	0	0.0783009	0	0.0587257	0	0.0195752	0	0	0	0.0195752	0.0293628	0.0195752	0	0	0	0.0685133	0	0.00978761	0	0.0391504	0	0	0	0.00978761	0	0	0.871097	0.00978761	0	0	0	0.117451	0
250	Streptococcus	0.0195752	0	0	0.00978761	0	0	0	0.00978761	0	0	0.0391504	0.0195752	0.176177	0	0	0	0.048938	0	0	0	0	0	0	0.0783009	0	0	0.0783009	0.0195752	0	0.0195752	0	0.0195752	0.0195752	0	0	0	0	0.0195752	0.00978761	0.0978761	0.00978761	0	0.0685133	0.0293628	0.137027	0	0	0.0685133
251	Lactobacillus	0	0	0	0	0.048938	0	0	0	0	0	0	0	0	0	0	0	0	0	0	0.00978761	0.293628	0.0587257	0	0	0	0	0	0	0	0	0	0	0	0	0	0	0.381717	0.048938	0	0	0	0	0	0	0	0	0	0
252	Synergistaceae	0	0	0.577469	0	0	0	0.00978761	0	0.0195752	0	0.00978761	0	0.195752	0.0293628	0.137027	0	0	0	0.185965	0	0.0391504	0	0	0	0.0195752	0.0195752	0	0	0.538318	0	0.117451	0	0	0.0293628	0	0	0	0	0	0	0	0	0	0	0.00978761	0.00978761	0.00978761	0
253	Streptococcus_gallolyticus	0	0	0	0	0	0	0	0	0	0	0	0	0	0	0	0	0	0.00978761	0	0	0	0	0	0	0	0	0	0	0.00978761	0	0	0	0	0	0	0	0	0	0	0	0	0	0	0	0	0	0	0
254	Streptococcus	0	0	0	0.107664	0	0	0.048938	0	0	0.195752	0	0	0	0	0	0	0	0	0	0.127239	0	0	0	0	0	0.988548	0	0	0	0	0	0	0	0	0	0.166389	0	0	0	0	0	1.54644	0	0	0	0	0	0
255	Actinomyces	0.156602	0	0	0.107664	0.00978761	0	0	0	0	0	0	0	0.352354	0	0	0	0.156602	0	0	0.137027	0.048938	0	0	0	0.00978761	0	0	0	0.117451	0	0	0	0.0391504	0	0	0.0783009	0	0	0	0	0	0	0	0	1.0277	0	0	0
256	Prevotella	0	4.91338	0	0	0	0	0	0	0	0	0	0.0195752	0	0	0	0	0	1.4192	0	0	0	0	0	0	0	0	0	0	0	0	0	0	0	0	0	0	0	0	0	0	0	0	0	0	0.107664	0	0	0
257	Streptococcus_agalactiae	0	0	0	0	0	0	0.00978761	0	0	0	0	0	0	0	0	0	0	0	0	0	0	0.00978761	0	0	0	0	0	0	0	0	0	0	0	0	0	0	0	0.00978761	0	0	0	0	0	0	0	0	0	0
258	Prevotella	0.0293628	0.176177	0.0587257	0	0.0391504	0	0.401292	0	0	0	0.0195752	0	0.00978761	0.508956	0.283841	0	0.0293628	0.20554	0.195752	0.00978761	0	0	1.84986	0	0.048938	0	0.0587257	0.00978761	0	0	0.048938	0	0.117451	0	0	0	0	0	0	0	0.127239	0	0	0	0	0	0.0293628	0
259	Treponema	0	0	0.234903	0	0	0	0	0	0	0	0	0	0	0	7.16453	0	0	0.0195752	0.0978761	0	0	0	0	0	0	0	0	0	0	0	4.79593	0	0	0	0.00978761	0	0	0	0	0	0	0	0	0	0	0	0.0391504	0
260	Streptococcus	0	0	0.0293628	0	0	0	0	0	0	0	0	0.00978761	0	0.0685133	0	0	0	0	0.0978761	0	0	0	0	0	0.0391504	0.225115	0	0	0	0.567681	0.0293628	0	0	0	0.107664	0	0	0	0.0195752	0	0	0.20554	0	0	0	0.420867	0.0685133	0.00978761
261	Actinomyces_lingnae	0.0391504	0.0391504	0.0391504	0.00978761	0.0391504	0.0587257	0.0195752	0	0.00978761	0.587257	0.0293628	0	0.195752	0.0195752	0	0.00978761	0	0.048938	0.0587257	0.0293628	0.137027	0.0293628	0.0391504	0	0	0.0783009	0.107664	0.156602	0.048938	0	0.0587257	0.0195752	0.0685133	0.156602	0.0587257	0.0587257	0	0.0391504	0.00978761	0	0	0.0685133	0.0391504	0	0.391504	0.0685133	0.0293628	0.0195752
262	Atopobium_rimae	0.0195752	0.225115	0.24469	0.0587257	0	0	0.0293628	0	0.0195752	0	0	0.0195752	0	0	0	0.283841	0.048938	0.0783009	0.0783009	0.254478	0.0880885	0	0.0293628	0.185965	0.0587257	0.0685133	0.0195752	0.00978761	0	0.225115	0	0.440442	0.00978761	0.166389	0.146814	0.0391504	0.342566	0	0	0.283841	0.00978761	0.0195752	0.0391504	0	0	0.0293628	0.0587257	0.20554
263	Streptococcus	0	0	0	0	0	0	0.0195752	0	0.0391504	0	0	0	0	0	0	0	0	0	0	0	0	0	0	0	0.371929	0	0	0	0	0	0	0	0	0	0.00978761	0	0	0	2.97543	0	0	0	0	0	0	0	0	0
264	Prevotella	0	0	0	0	0	0	0.195752	0	0.166389	0	0	0	0.048938	0	0.0587257	0	0	0	0.0587257	0.0195752	0	0	0	0	0.362142	0	0	0	0	0	0.0587257	0	0	0.0293628	0	0	0	0	0	0	0	0	0.0195752	0	0	0	0.00978761	0
265	Rhodobacteraceae	0	0	0	0	0	0	0	0	0	0	0	0	0	0	0.048938	0	0	0	0.0195752	0	0	0	0	0	0	0	0	0	0	0	0	0	0	0	0.00978761	0.24469	0	0.048938	0.0293628	0	2.01625	0	0	0.0195752	0	0	0	0.00978761
266	Atopobium	0.048938	0	0	0	0	0	0.0391504	0	0.137027	0.929823	0	0	0	0.0391504	0	0.00978761	0.048938	0	0	0	0	0	0	0.00978761	0.00978761	0.0685133	0	0	0	0.0587257	0	0.0293628	0.00978761	0	0	0	0	0.0880885	0.0195752	0.00978761	0	0.117451	0	0	0	0	0	0.117451
267	Veillonella	0.00978761	0	0.0293628	0	0.00978761	0	0	0	0.0195752	0	0	0	0.156602	0.107664	0.0195752	0.00978761	0.048938	0.00978761	0.0978761	0.00978761	0.0195752	0	0	0.0293628	0	0	0.0195752	0.00978761	0.0293628	0.0587257	0	0	0	0.0391504	0	0.048938	0	0.048938	0	0.0293628	0	0.00978761	0	0	0	0.0293628	0.00978761	0
268	Prevotella	0	0	0.283841	0.0293628	0	0	0	0	0	0	0	0	0.538318	0	0.479593	0.20554	0	0	0.342566	0.117451	0	0	0	0	0.0195752	0	0	0	1.04727	0	0.763433	0.557894	0	0.00978761	0.00978761	0	0	0	0	0	0	0	0	0	0	0	0.460018	0
269	Campylobacter_gracilis	0.107664	0.0685133	0.0293628	0	0	0	0.127239	0.127239	0.0195752	0.0293628	0	0	0.0195752	0.048938	0	0.0293628	0.0880885	0.185965	0.577469	0.107664	0.283841	0.783009	0.0391504	0.0587257	0.332779	0.166389	0.00978761	0.117451	0.371929	0.107664	0.185965	0.0978761	0.156602	0	0	0	0	0.215327	0	0.0978761	0	0.0587257	0	0	0	0.0587257	0.0391504	0.0195752
270	Peptoniphilus	0	0	0	0	0	0	0	0	0	0	0	3.46481	0	0	0.0391504	0	0	0	0	0	0	0	0	0	0	0	0	0	0	0	0	0	0	0	0	0.0978761	0	0.303416	0	0	0	0	0.0293628	0.41108	0.0195752	0	0.00978761	0.0587257
271	Streptococcus	0	0	0.342566	0	0	0	0.0978761	0	0	0	0	0	0	0	0	0	0	0	0.146814	0	0	0	0	0	0	0	0	0	0	0	0	0	0	0	0.420867	0	0	0	0	0	0	0	0	0	0	0	0	0
272	Actinomyces	1.04727	0	0.166389	0	0	0	0.0391504	0	0	0.0978761	0	0	0	0	0	0	0.371929	0	0.0685133	0	0.00978761	0	0	0	0	0.254478	0	0	0	0	0	0.137027	0.41108	0	0.234903	0	0	0	0.0195752	0	0.0195752	0.508956	0	0	0	0	0	0.127239
273	Pasteurellaceae	0	0.371929	0.0195752	0.0293628	0.0880885	0.00978761	0.127239	1.93795	0.0391504	0.0880885	0.0587257	0	0	0.195752	0.254478	0.048938	0.0587257	0.0587257	0	0.048938	0.176177	0	0.0195752	2.76011	0.048938	0.20554	0.0880885	0	0	0.342566	0.274053	0.0978761	0.117451	0.00978761	0.0195752	0.00978761	0	0	0.00978761	0.65577	0.0195752	0.127239	0.0293628	0	0	0	0.048938	0.215327
274	Granulicatella	0	0	0.0195752	0.00978761	0	0	0	0	0.137027	0.0293628	0	0	0.0685133	0.0195752	0	0.0195752	0	0	0	0	0	0	0	0	0.0783009	0.0195752	0	0	0	0	0	0.0880885	0	0.0685133	0	0	0	0	0.048938	0	0	0	0	0	0.20554	0	0.00978761	0.0685133
276	Streptococcus	0	0	0	0	0	0	0	0	0	0	0	0	0.00978761	0.0391504	0.0391504	0	0	0	0	0	0	0	0	0	0	0.00978761	0.00978761	0.0195752	0	0.0587257	2.1337	0	0	0	0.00978761	0	0	0	0	0	0	0	0	0.048938	0.00978761	0.0293628	3.22991	0
277	Paracoccus	0	0.048938	0	0.401292	0	0	0	0	0	0.00978761	0	0	0	0	0.0293628	0.00978761	0	0	0	0	0	0	0	0	0	0	0	0	0	0	0	0	0	0	0.048938	0.048938	0	0.0783009	0	0	0.283841	0	0	0.166389	0.0293628	0.0195752	0	0
278	Streptococcus	0.00978761	0	0	0	0	0	0	0	0.0195752	0	0	0.00978761	0	0	0	0.00978761	0.127239	0.00978761	0	0	0.0195752	0	0	0.0195752	0.0293628	0.0783009	0	0	0	0	0	0.00978761	0.0293628	0.048938	0.00978761	0	0.0587257	0.00978761	0.0978761	0.0195752	0	0.0195752	0	0	0	0	0	0.0195752
279	Streptococcus	0.00978761	0	0	0.0293628	0.528531	0	0.048938	0	0	0	0	0	0	0	0	0	0.0293628	0	0	0	0.675345	0.00978761	0	0	0.00978761	0	0	0	0	0	0	0	0	0	0	0	0.880885	0.0685133	0	0	0	0.0293628	0	0	0	0	0	0
280	Enhydrobacter	0	0	0	0.00978761	0	0	0.0391504	0	0	0	0	0	0	0	0.00978761	0	0	0	0	0	0	0	0	0	0	0.0195752	0	0	0	0	0	0	0	0	0.00978761	0.107664	0	1.01791	0.0293628	0	0	0	0	0.65577	0	0	0	0.0293628
281	Actinomyces	0	0.0195752	0.0195752	0.0195752	0.0195752	0	0	0	0.00978761	0.0195752	0	0	0	0	0	0	0	0	0.00978761	0	0.0195752	0	0	0	0.0195752	0.0587257	0	0	0	0	0.0293628	0	0	0	0.0293628	0	0.0391504	0	0.0783009	0	0	0.00978761	0	0	0	0.0195752	0.0587257	0
282	Capnocytophaga	0	0	0	0	0	0	0	0	0	0	0	0	0	0.00978761	0.0195752	0	0.00978761	0	0	0	0	0	0	0	0.0293628	0	0	0	0	0.00978761	0.00978761	0	0.00978761	0	0	0	0	0	0	0	0	0	0	0	0	0	0	0
283	Actinomyces	0	0	0	0	0	0	0	0	0.048938	0	0	0	0	0	0	0	0	0	0	0	0	0	0	0	0	0	0	0	0	0	0	0	0	0	0	0	0	0	0.00978761	0	0	0	0	0	0	0	0	0
284	Actinomyces	0.0391504	0	0.176177	0	0.117451	0.048938	0.048938	0	0.0195752	0.528531	0	0	0.00978761	0	0	0	0.048938	0	0.274053	0	0.254478	0.0391504	0	0	0.0195752	0.949398	0	0	0.0391504	0	0	0	0.00978761	0	0.391504	0.0293628	0.0391504	0.0587257	0	0	0.20554	1.53665	0	0	0.0195752	0	0	0
285	Lachnospiraceae	0	0	0	0	0	0	0.048938	0	0	0	0	0	0	0.0195752	0	0	0	0	0	0	0	0	0	0	0	0	0	0	0	0	0.00978761	0	0	0	0	0.0587257	0	0.185965	0.00978761	0	0	0	0.00978761	0	0	0.0195752	0	0
286	Tessaracoccus	0	0	0	0	0	0	0	0	0	0	0	0	0.00978761	0	0	0	0	0	0	0	0.00978761	0	0	0	0	0	0	0	0.0293628	0.322991	0	0	0	0	0	0	0	0	0	0	0	0	0	0	0.303416	8.00626	0	0
287	Actinomyces	0	0	0	0	0	0.234903	0.00978761	0	0.313203	0.322991	0	0	0.00978761	0.00978761	0	0	0	0	0	0	0	0.127239	0	0	0.0293628	0.0587257	0	0	0	0	0	0	0	0	0	0	0	0.00978761	0.0685133	0	0	0.048938	0	0	0	0	0	0
288	Streptococcus	0	0	0	0.107664	0	0	0	0	0	0	0	0	0	0.45023	0	0.176177	0	0	0.00978761	0.048938	0	0	0	0	0	0	0	0	0.0293628	1.0277	0	0.0880885	0	0	0	0.00978761	0	0	0.0195752	0	0	0	0.00978761	0	0.0391504	0.156602	0	0.195752
289	Lactobacillus	0	0	0	0	0	0	0	0	0	0	0	0	0	0	0	0	0	0	0	0	0.0195752	0	0	0	0	0	0	0	0	0.0293628	0	0	0	0	0	0	0	0	0	0	0	0	0	0	0	0	0	0
290	Porphyromonas	0.0293628	0	0	0.362142	0	0	0.342566	0	0.880885	0	0.342566	0	0	0.20554	0	0	0.0587257	0	0	0.117451	0.0587257	0	0	0	0.645982	0	0.352354	0	0	0.137027	0	0.0293628	0.234903	0	0	0	0	0.107664	0	0	0	0	0.20554	0.048938	0	0	0	0
291	Synergistaceae	0	0.45023	0.567681	0	0	0	0.0293628	0.998336	0	0.0293628	0	0.0195752	0.137027	0	0.313203	0	0	0.362142	0.215327	0	0.00978761	0	0	0.792796	0.00978761	0.0293628	0	0	0.352354	0	0.0880885	0	0	0	0	0	0	0.00978761	0	0.332779	0	0	0	0.00978761	0	0.00978761	0	0
292	Streptococcus	0	0	0	0	0	0	0	0	0	0	0.0978761	0	0	0	0	0	0	0	0	0	0	0	0	0	0	0	0.107664	0.00978761	0	0	0.0195752	0	0	0	0	0	0	0	0	0	0	0	0.195752	0	0	0	0.00978761	0
293	Actinomyces	0	0	0.048938	0.430655	0	0	0	0	0	0	0	0	0	0.0293628	0	0	0	0	0.00978761	0.156602	0	0	0	0	0	0	0	0.156602	0	0	0	0	0	0	0.00978761	0.322991	0	0.0783009	0	0	0.00978761	0	0	0	0	0	0	0
294	Prevotella	0	0	0	0	0	0	0.24469	0.264265	0.048938	0	0	0	0	0	0.185965	3.03416	0	0	0.0195752	0	0	0	0	0.146814	0.430655	0	0	0	0	0	0.156602	1.46814	0	0	0	0	0	0	0	0.371929	0	0	0.0195752	0	0	0	0.0880885	0.0587257
295	Catonella_morbi	0	0	0.0195752	0	0	0	0	0	0.0293628	0	0.0391504	0	0.0587257	0.117451	0.048938	0.0685133	0	0.117451	0	0.048938	0.0293628	0	0.0391504	0	0.0587257	0	0.0880885	0.048938	0.0587257	0.107664	0.24469	0.137027	0	0.166389	0	0	0	0	0	0	0	0	0.0685133	0	0	0.0391504	0.048938	0
296	Prevotella	0.0880885	0.156602	0.0195752	0.362142	0.0783009	0	0	0.0195752	0	0.127239	0	0	0.195752	0.00978761	0	0.00978761	0.048938	0.215327	0.0391504	0.773221	0.137027	0	0	0.0391504	0	0.00978761	0	0.0783009	0.577469	0	0.048938	0.0293628	0.0880885	0	0.0391504	0.460018	0	0.0195752	0	0.0293628	0.0587257	0.048938	0	0	0	0.0391504	0	0
297	Mogibacterium_vescum	0.00978761	0.00978761	0	0	0	0	0.0195752	0	0	0.048938	0	0	0.0783009	0.0293628	0	0	0.00978761	0.176177	0.00978761	0	0	0	0	0	0.0685133	0.137027	0	0.0293628	0	0.0587257	0.00978761	0	0	1.45835	0.0391504	0	0	0	0.0293628	0.00978761	0	0.127239	0.0195752	0.00978761	0.107664	0.0391504	0.0783009	0.0195752
298	Abiotrophia	0	0	0	0	0	0	0	0	0.048938	0	0	0	0	0.0587257	0	0	0	0	0	0	0	0	0	0	0.0391504	0	0	0.00978761	0	0.332779	0.048938	0	0	0	0	0	0	0	0.215327	0.0293628	0	0	0	0.225115	0	0.371929	0.00978761	0
299	Porphyromonas	0.0587257	0	0.0293628	0.381717	0	0	0	0	0.0195752	0	0	0	0	0.0880885	0	0.117451	0.234903	0.0293628	0	0.048938	0	0	0	0	0.00978761	0	0	0	0	0.362142	0	0.0391504	0.381717	0	0	0	0	0	0	0	0	0	0	0	0	0.0391504	0	0
301	Rothia	0.00978761	0.234903	0	0.137027	0	0	0	0	0.00978761	0	0.048938	0	1.21366	0.0195752	0.048938	0	0.166389	0	0	0.00978761	0.00978761	0	0	0	0	0	0.0978761	0.0293628	0.0587257	0	0.0391504	0	0.127239	0.0391504	0	0.0293628	0	0	0	0	0	0.0978761	0.225115	1.2626	0.0685133	0.0195752	0.0293628	0
302	Modestobacter	0	0	0	0	0	0	0	0	0	0	0	0	0	0	0	0	0	0	0	0	0	0	0	0	0	0	0	0	0	0	0	0	0	0	0	0	0	0.00978761	0	0	0	0	0	0	0	0	0	0
303	Actinomyces	0.460018	0	0	0	0.00978761	0.0391504	0	0	0	0	0.00978761	0	0.0391504	0.00978761	0	0.00978761	1.2626	0	0	0.00978761	0.0195752	0	0	0.00978761	0	0.00978761	0.048938	0.0293628	0	0.0293628	0	0.234903	1.1843	0	0	0	0	0.0195752	0	0.00978761	0.00978761	0.0195752	0.137027	0.107664	0	0	0	0.401292
304	Enhydrobacter	0	0	0	0	0	0	0.0391504	0	0	0	0	0	0	0	0	0	0	0	0	0	0	0	0	0	0	0	0	0	0	0	0	0	0	0	0	0	0	0	0	0	0	0	0	0.0293628	0	0	0	0
305	Prevotella_scopos	0	0	0	0	0	0	0.195752	0	0	0	0.0783009	0	0	0.0391504	0	0	0	0	0	0	0.0293628	0	0.724283	0	0	0	0.0587257	0	0	0	0	0	0	0	0	0	0	0	0	0	0.166389	0	0.0783009	0	0	0	0	0
306	Oribacterium	0	0.0587257	0	0.048938	0	0	0.127239	0	0.117451	0	0.0391504	0	0.0685133	0.0293628	0.0195752	0.00978761	0	0.137027	0	0.0195752	0	0	0.342566	0	0.283841	0	0.0978761	0.0978761	0.146814	0.0195752	0.0195752	0.107664	0	0.0685133	0	0	0	0.127239	0	0	0	0	0.048938	0	0	0.048938	0	0.00978761
308	Dialister_pneumosintes	0	0.538318	0.00978761	0.127239	0	0	0.0195752	1.87922	0.048938	0.0880885	0	0	0.0685133	0.0195752	0.117451	0.753646	0	0.048938	0.00978761	1.12558	0.0293628	0	0	0.342566	0.0391504	0.00978761	0	0.0195752	0.0783009	0.00978761	0.137027	0.420867	0	0.0783009	0.0391504	0.0391504	0	0.0293628	0	0.0391504	0.0783009	0	0	0	0	0.0293628	0.0391504	0
309	Leptotrichiaceae	0	0.0293628	0	0	0	0	0.0685133	0	0.0293628	0	0	0	0	0.00978761	0	0.0391504	0.0293628	0.048938	0	0	0	0	0	0	0	0	0	0.00978761	0	0.0391504	0.0391504	0.0978761	0	0	0	0	0	0	0	0	0	0	0	0	0	0.048938	0	0
310	Streptococcus	0.0587257	0	0	0.0293628	0	0	0.0195752	0	0	0.274053	0	0	0.0978761	0	0	0	0.0685133	0	0	0.176177	0.00978761	0	0.0195752	0	0	0.362142	0	0	0.0880885	0	0	0	0.0293628	0	0	0.195752	0	0	0	0	0	0.254478	0	0	0.508956	0	0	0
311	Lachnoanaerobaculum	0	0	0.0195752	0	0	0.0587257	0.185965	0	0	0	0	0	0	0.00978761	0	0	0.0293628	0	0.00978761	0.00978761	0.225115	0.215327	0	0	0	0	0	0	0	0.107664	0.00978761	0	0	0	0.0195752	0	0	0.176177	0	0	0	0	0	0	0	0	0	0
312	SR1_genera_incertae_sedis	0	0.342566	0	0.0880885	0	0	0	0	0	0	0.234903	0.00978761	0	0	0	0	0	2.42733	0	0.0195752	0	0	0	0	0	0	0.166389	0	0	0	0	0	0	0.636195	0	0	0	0	0	0	0	0	0.117451	0	0	0	0	0
313	Enhydrobacter	0	0	0	0	0	0	0.0391504	0	0	0	0	0	0	0	0.00978761	0	0	0	0	0	0	0	0	0	0	0	0	0	0	0	0	0	0	0	0.00978761	0.00978761	0	0.0195752	0.00978761	0	0	0	0	0.048938	0	0	0	0
314	Porphyromonas	0	0	0	0.0783009	0	0	0.0685133	0.137027	0	0	0	0	0	0.156602	0	0.00978761	0	0	0	0.743858	0.0293628	0	0	0.65577	0	0	0	0	0	0.949398	0	0	0	0	0.215327	0.479593	0	0.00978761	0	0.362142	0	0	0	0	0	0	0	0
315	Capnocytophaga_sputigena	0	0	0	0.0195752	0	0	0.0195752	0	0.0195752	0	0.0391504	0	0	0.00978761	0	0	0.0978761	0	0	0.00978761	0.0195752	0	0.00978761	0	0.0195752	0	0	0	0	0.00978761	0	0	0	0	0	0	0	0	0	0	0	0	0.00978761	0	0	0	0	0
316	Prevotella_oulorum	0.69492	0.518743	0.166389	0.00978761	0.0195752	0.0978761	0.0391504	0	0	0.0195752	0	0.00978761	0.0195752	0.00978761	0.0587257	0.0391504	0.048938	0.841734	0.185965	0.0587257	0.0880885	0.185965	0.0195752	0.0587257	0.0195752	0	0	0	0.234903	0.127239	0.0587257	0.0587257	0.0195752	0	0	0.00978761	0	0	0	0.146814	0	0	0	0	0	0	0.0880885	0
317	Prevotella	0	0	0	0	0	0	0	0	0	0	0	0	0	0	0	0	0	0	0	0	0	0	0	0	0	0	0	0	0	0	0	0	0	0	0	0	0	0	0	0	0	0	0	0	0	0	0	0
318	Leptotrichiaceae	0	0	0	0	0	0	0	0	0	0	0	0	0.00978761	0	0	0	0	0	0	0	0	0	0	0	0	0	0	0	0	0.0195752	0	0	0	0.00978761	0	0	0	0	0	0	0	0	0	0	0	0	0	0
319	Haemophilus_haemolyticus	0	0	0	0	0	0	0.0391504	2.16306	0	0	0.117451	0	0	0.00978761	0	0	0	0	0	0	0	0	0	1.80092	0	0	1.13536	0	0	0.127239	0	0	0	0	0.00978761	0	0	0.00978761	0.0293628	0.264265	0	0	0.303416	0	0	0	0	0
320	Burkholderia	0	0	0	0	0	0	0	0	0	0	0	0	0	0	0	0	0	0	0	0	0	0	0	0	0	0	0	0	0	0	0	0	0	0	0	0.0293628	0	0.00978761	0	0	0	0	0	0.0685133	0	0	0	0
321	Streptococcus	0	0	0	0	0.0195752	0	0	0	0.00978761	0	0	0	0	0	0	0	0.0587257	0	0	0	0.0293628	0	0	0	0.0293628	0	0	0	0	0	0.146814	0	0.0685133	0	0	0	0	0	0.176177	0	0	0	0	0	0	0	0.156602	0
322	Veillonella_tobetsuensis	0	2.59372	0	0	0	0	0.93961	0	0	0	0.841734	0.0293628	0	0	0.577469	0	0	0.215327	0	0	0	0	0.675345	0	0	0	0.65577	0	0	0	0.00978761	0	0	0.293628	0.00978761	0	0	0	0	0	0.0293628	0	0.117451	0	0	0	0.0195752	0.00978761
323	Treponema	0	0	0.313203	0.0195752	0	0	0	0	0	0.871097	0	0	0	0	0	0	0	0	0.283841	0.420867	0	0	0	0	0	0	0	0	0	0	0	0	0	0	0	0.127239	0	0	0	0	1.23324	0	0	0	0	0	0	0
324	Actinomyces	0	0	0	0	0	0.0391504	0	0	0	0	0	0	0.127239	0	0	0	0.0195752	0	0	0	0	0.225115	0	0.048938	0	0	0	0	0.00978761	0	0.00978761	0	0.0195752	0	0	0	0	0.0978761	0	0.00978761	0	0	0	0.00978761	0.0587257	0	0	0
325	Solobacterium	0	0.0391504	0	0.0293628	0	0	0	0	0	0	0.048938	0	0	0	0	0	0	0.45023	0	0	0	0	0.00978761	0	0.00978761	0	0.048938	0	0	0	0	0	0	1.64432	0.00978761	0.00978761	0	0	0	0	0	0	0.0880885	0.00978761	0	0	0.0195752	0
326	Prevotella	0	0	0.00978761	0	0	0	0	0	0	0	0	0	0	0	0	0	0	0	0	0	0	0	0	0	0	0	0	0	0	0	0	0	0	0	0	0	0	0	0	0	0	0	0	0	0	0	0	0
327	Streptococcus	0	0	0.00978761	0	0.00978761	0.0783009	0.117451	0	0	0.0293628	0	0	0.00978761	0	0	0	0.0293628	0	0.00978761	0.0195752	0.156602	0.283841	0	0	0	0.127239	0	0	0	0	0	0	0.0195752	0	0.0293628	0.0195752	0.45023	0.215327	0	0	0	0.0293628	0	0	0.00978761	0	0	0
328	Cloacibacterium	0	0.0391504	0	0	0	0.00978761	0	0	0	0	0	0	0	0	0	0	0	0	0	0	0	0	0	0	0	0	0	0	0	0	0	0	0	0	0	0	0	0	0	0	0.0880885	0	0	0	0.234903	0	0	0.00978761
329	Streptococcus	0.499168	0	0	0	0	0	0.0391504	0	0.185965	0.00978761	0	0	0	0	0	0	0.048938	0	0	0	0	0	0	0	0.254478	0.0587257	0	0.0195752	0	0.0293628	0	0	0.0293628	0	0	0	0	0	0.137027	0	0	0.048938	0	0	0.0195752	0	0	0
330	Corynebacterium	0.176177	0	0	0.00978761	0	0.0293628	0.0783009	0	0	0.0195752	0	0	0.00978761	0	0.048938	0	0.107664	0.00978761	0	0.0391504	0.107664	0	0	0.548106	0	0.0391504	0	0.0391504	0.00978761	0.048938	0.107664	0.0293628	0.0391504	0.107664	0.00978761	0.0195752	0	0.0195752	0	0.322991	0.518743	0.0783009	0.0195752	0	0	0.0195752	0.0391504	0.00978761
331	Bacteroides	0	0	0	0	0	0	0.20554	0	0	0	0	0	0	0	0	0	0	0	0	0	0	0	0	0	0	0	0	0	0	0	0	0	0	0	0	0	0	0.0391504	0	0	0	0	0	0	0	0	0	0
332	Haemophilus_influenzae	0.00978761	0	0.0195752	0	0	0.0195752	0	0.0880885	0	0	0	0	0	0	0	0	0	0	0.048938	0	0.048938	0.00978761	0.0880885	0.00978761	0	0	0	3.41588	0.00978761	0	0	0.274053	0.00978761	0.00978761	0.0293628	0	0	0	0	0	0	0	0	0.0587257	0	0	0	0
333	Erysipelotrichaceae_incertae_sedis	0	0	0	0	0	0	0.0391504	0	0	0.0195752	0.00978761	0	0	0	0	0	0	0	0	0.00978761	0	0	0	0	0	0	0	0	0	0	0	0	0	0	0	0	0	0.00978761	0	0	0	0	0	0	0	0	0	0
334	Prevotella	0	0	0.48938	0.00978761	0.283841	0	0.0685133	0	0.469805	0	0	0	0.0685133	0.254478	0	0.0293628	0	0.00978761	0.48938	0	0.440442	0	0	0	0.41108	0	0	0	0.45023	0	0	0.0195752	0	0	0	0	0	0.176177	0	0	0.00978761	0	0	0	0.0195752	0.00978761	0	0
335	Leptotrichiaceae	0	0	0	0	0	0	0	0	0	0	0	0	0.00978761	0	0	0	0	0	0	0	0	0	0	0	0	0	0	0	0	0	0	0	0	0	0	0	0	0	0	0	0	0	0	0	0.00978761	0	0	0
336	Actinomyces	0.0685133	0	0.166389	0.0195752	0.0195752	0	0	0	0	0	0	0	0	0.00978761	0.0391504	0	0.176177	0.0195752	0.048938	0	0.127239	0.00978761	0	0	0	0	0	0	0	0.048938	0.0685133	0.0293628	0.166389	0.0685133	0.146814	0	0.146814	0.0195752	0	0	0.0195752	0	0	0	0	0.0195752	0.0880885	0.0880885
337	Prevotellaceae	0	0	0	0	0	0	0	0	0	0	0.00978761	0	0.665557	0.0195752	0	0	0	0.0195752	0	0	0	0	0	0	0	0	0.00978761	0	2.59372	0	0	0	0	0	0	0	0	0	0	0	0	0	0	0	0	0.0587257	0	0
338	Actinomyces	0	0	0	0	0	0	0	0	0	0	0	0	0	0	0	0	0	0	0	0	0	0	0	0	0	0	0	0	0	0	0	0	0	0	0	0	0	0	0	0	0	0	0	0	0	0	0	0
339	Prevotella	0	0	0.0293628	0.0195752	0.00978761	0	0.528531	0	0	0	0.0293628	0	0	0.127239	0	0	0	0	0.00978761	0	0.00978761	0	4.6589	0	0	0	0	0	0	0	0	0	0	0	0	0	0	0.00978761	0	0	0	0	0.0195752	0	0	0	0	0
340	Anaerococcus	0	0	0	0	0	0	0	0	0	0	0	0	0	0	0	0	0	0	0	0	0	0	0	0	0	0	0	0	0	0	0	0	0	0	0	0.00978761	0	0	0	0	0	0	0	0.0293628	0	0	0	0
341	Streptococcus	0	0	0	0	0.00978761	0	0	0	0	0	0	0	0.00978761	0	0	0	0	0	0	0	0	0	0	0	0	0	0	0	0	0	0	0	0	0	0.00978761	0	0	0	0.00978761	0	0	0	0.0195752	0	0	0	0	0
342	Prevotella	0	0	0	0	0	0	0	0	0	0	0.597044	0	0.391504	0	0	0.00978761	0	0.00978761	0	0	0	0	0	0	0	0	0.871097	0	1.95752	0	0	0.0978761	0	0.00978761	0	0	0	0	0	0	0	0	0.626407	0	0	0.0978761	0	0.0195752
343	Bacteroides_dorei	0	0.0195752	0	0	0	0	0.00978761	0	0	0	0	0	0	0	0.0195752	0	0	0	0	0.00978761	0	0	0	0	0.00978761	0.0195752	0	0.048938	0.0195752	0	0	0	0	0	0	0	0	0.0195752	0	0	0	0	0.0391504	0.0880885	0.0293628	0.0293628	0	0
344	Treponema	0	5.33425	0	0	0	0	0	0	0	0	0.048938	0.107664	0	0	0	0	0	3.05373	0	0	0	0	0	0	0	0	0	0	0	0	0	0	0	0.00978761	0	0	0	0	0	0	0	0	0.0195752	0	0	0	0	0
345	Lachnospiracea_incertae_sedis	0	0	0	0	0	0	0.0587257	0	0	0.0293628	0	2.95586	0.00978761	0	0	0	0	0.00978761	0	0	0	0	0	0	0	0.0195752	0	0	0.00978761	0	0.00978761	0	0	0	0.00978761	0.146814	0	0.0391504	0	0	0	0.0195752	0.0195752	0.783009	0.00978761	0	0	0
346	Streptococcus	0	0	0	0	0	0	0.20554	0	1.01791	0	0	0	0	0	0	0	0	0	0	0	0	0	0	0	0.420867	0	0	0	0	0	0	0	0	0	0	0	0	0	0.577469	0	0	0	0	0	0	0	0	0
347	Actinomyces	0.802584	0.0293628	0.0293628	0.0587257	0.00978761	0	0.0391504	0	0.0685133	0	0	0	0.107664	0	0	0	0.215327	0.0391504	0.0195752	0.0783009	0.0978761	0	0	0	0.0391504	0	0	0	0.0293628	0.00978761	0	0.0195752	0.20554	0.215327	0	0	0	0	1.06685	0	0.146814	0.00978761	0	0	0.176177	0	0.00978761	0.048938
348	Alloprevotella	0.00978761	0.00978761	0	0	0	0.00978761	0.734071	0	0	0	0	0	0	0	0	0	0.117451	0	0	0.00978761	0.0195752	4.00313	0	0	0	0	0	0	0	0	0	0	0.048938	0	0.0195752	0	0	1.04727	0	0	0	0	0	0	0	0	0	0
349	Prevotella	0.0880885	0	0.176177	0.0195752	0.283841	0	0.0587257	0	0.0391504	0.538318	0	0	0	0	0	0	0.048938	0	0.234903	0.048938	0.0293628	0	0	0.00978761	0.048938	0.00978761	0	0	0	0	0	0	0.195752	0	0	0.166389	0	0.0880885	0	0	0	0	0	0	0	0	0	0
350	Treponema	0	2.6035	0	0	0	0	0	0	0	0	0.00978761	0	0	0	0.00978761	0	0	0.665557	0	0	0.0978761	0	0	0	0	0	0	0	0	0.00978761	0.048938	0	0	0	0	0	0	0.0880885	0	0	0	0	0	0	0	0	0	0
351	Anaerococcus_octavius	0	0	0	0	0	0	0.00978761	0	0	0	0	0	0	0	0	0	0	0	0	0	0	0	0	0	0	0	0	0	0	0	0	0	0.00978761	0	0.00978761	0	0	0.440442	0	0	0.0587257	0	0	0.127239	0	0	0	0
352	Micrococcus	0	0.0685133	0	0	0	0	0	0	0	0	0	0	0	0	0.00978761	0	0	0	0	0	0	0	0	0	0	0	0	0	0	0	0	0	0	0.00978761	0.00978761	0.0978761	0.0978761	0.0880885	0.00978761	0	0.303416	0.00978761	0.00978761	0.469805	0.00978761	0.0195752	0	0.0195752
353	Streptococcus	0.528531	0	0.0293628	0	0.0391504	0.0391504	0	0	0	0.00978761	0	0	0	0	0	0	0.225115	0	0.0685133	0	0.0195752	0.00978761	0	0	0	0	0	0.0293628	0	0	0	0	0.166389	0	0.156602	0	0.00978761	0.00978761	0	0	0	0	0	0.048938	0	0	0	0
354	Peptoniphilus_lacrimalis	0	0	0.0587257	0	0	0	0.0880885	0	0	0	0	0	0	0.0195752	0	0	0.0391504	0	0.0195752	0	0	0.743858	0	0	0	0	0	0	0	0.0978761	0	0	0.00978761	0	0	0.048938	0	0.401292	0	0	0.24469	0	0	0	0	0	0	0.0195752
355	Escherichia_or_Shigella	0	0.00978761	0	0	0	0	0.127239	0	0	0	0	0.0195752	0	0	0.00978761	0	0	0	0	0	0	0	0	0	0	0	0	0	0	0	0	0	0	0	0	0	0.0783009	0.0293628	0.00978761	0	0.0783009	0	0	0.0293628	0	0	0	0
356	Lachnoanaerobaculum	0	0	0.0685133	0	0.0391504	0.00978761	0.0391504	0	0	0.107664	0	0	0.166389	0	0	0	0	0	0.0783009	0	0	0.0685133	0.00978761	0	0	0.0587257	0	0.117451	0.0978761	0	0	0.0293628	0	0	0	0	0	0.0685133	0	0	0	0.0293628	0	0	0	0.048938	0	0.0587257
357	Kocuria	0	0.048938	0	0	0	0	0.0978761	0	0	0	0	0	0	0	0.00978761	0	0	0	0	0	0	0	0	0	0	0	0	0	0	0	0	0	0	0.0195752	0.0195752	0.0783009	0.0978761	0.342566	0	0	0.352354	0	0.00978761	0.293628	0.0195752	0.00978761	0	0
358	Streptococcus	0	0	0.00978761	0	0	1.40942	0.107664	0	0.0880885	0	0	0	0	0	0	0	0	0	0	0	0	0.303416	0	0.00978761	0.0587257	0	0	0	0	0	0	0	0	0	0	0	0.00978761	0.195752	0.274053	0	0.0195752	0	0	0	0	0	0	0
359	Prevotellaceae	0	0.0783009	0	0.420867	0	0	0	0	0	0	0.0685133	0	0	0.724283	0.137027	0	0	0.20554	0	0.0195752	0	0	0	0	0	0	0.127239	0	0	0.0783009	0.0195752	0	0	0	0	0.0685133	0	0	0	0	0	0	0.048938	0	0	0	0.185965	0
360	Sneathia	0	0	0	0	0	0	0.0293628	0.841734	0	0	0	0	0	0	0	0	0	0	0	0	0	0	0	1.54644	0	0	0	0	0	0	0	0	0	0	0	0	0	0	0	0.65577	0	0	0	0	0	0	0	0
361	Staphylococcus	0	0	0	0	0	0	0.0391504	0	0	0	0	1.63453	0	0	0	0	0	0	0	0	0	0	0	0	0	0	0	0	0	0	0	0	0	0.00978761	0.0783009	0.195752	0	0	0	0	0	0	0.0391504	0.0391504	0.0293628	0	0	0.00978761
362	Actinomyces	0	0	0	0	0	0	0.00978761	0	0	0	1.24303	0	0	0	0	0	0	0	0	0	0	0	0	0	0	0	2.27073	0	0	0	0	0	0	0.00978761	0	0.0293628	0	0	0	0	0	0	1.31154	0	0	0	0	0
364	Corynebacterium_vitaeruminis	0	0	0	0	0	0	0	0	0	0	0	0.313203	0	0	0	0	0	0	0	0	0	0	0	0	0	0	0	0	0	0	0	0	0	0	0	0	0	0	0	0	0	0	0	0.00978761	0.00978761	0	0	0
365	Parvimonas	0	0	0	0	0	0.00978761	0	0.107664	0	0	0	0	0	0	0	0	0	0	0	0	0	0	0	1.72262	0	0	0	0	0	0	0	0	0	0	0	0	0.00978761	0.0391504	0	1.4192	0.127239	0	0	0	0	0	0	0
366	Veillonella	0.00978761	0	0	0	0.156602	0	0	0.0391504	0	0	0	0	0.00978761	0	4.3457	0	0.117451	0	0.00978761	0	0.0685133	0	0	0	0	0	0	0	0	0	0.0293628	0	0.0880885	0	0	0	0	0.0195752	0	0	0	0	0	0.00978761	0	0.00978761	0.156602	0
367	Alloprevotella	0	0.0195752	0.00978761	0	0.00978761	0.0293628	0.00978761	0.675345	0	0	0	0	0	0.048938	0	0.0195752	0	0.0195752	0.00978761	0	0.048938	0	0	0.871097	0.0195752	0	0	0	0	0.156602	0.0195752	0	0	0	0	0	0	0.0195752	0	0.362142	0	0	0	0	0	0	0.00978761	0
368	Anaerostipes_hadrus	0	0.00978761	0	0.00978761	0	0	0.0391504	0	0	0	0	0.0293628	0	0	0	0	0	0	0	0	0	0	0	0.00978761	0	0.00978761	0	0.00978761	0	0	0	0	0	0	0	0.00978761	0	0	0	0	0	0.0195752	0	2.19242	0	0	0	0.00978761
369	Actinomyces	0	0	0	0	0.0587257	0	0	0	0	0	0	0	0	0	0	0	0	0	0	0	0.0195752	0	0.0587257	0	0	0	0	0	0	0	0	0	0	0	0	0	0	0	0	0	0	0	0	0	0	0	0	0
370	Actinomyces	0	0	0	0	0	0	0.00978761	0	0	0	0	0	0.107664	0	0	0	0	0.137027	0	0	0	0.0391504	0.0195752	0.0293628	0	0	0.00978761	0	0.048938	0	0	0	0	0.293628	0	0	0	0.048938	0	0.0195752	0	0	0.0195752	0	0.322991	0.0293628	0	0
371	Porphyromonas	0	0	0	0	0	0	0.0587257	0	0	0	0	0	0	0.0195752	0	0	0	0	0	0	0	0	0.0195752	0	0	0	0	0	0	0.0195752	0	0	0	0	0	0	0	0	0	0	0	0	0	0	0	0	0	0
372	Campylobacter	0	0	0	0	0	0	0	0	0	0	0.0391504	0	0.0293628	0.0195752	0	0	0	0	0	0	0	0	0	0	0	0	0.283841	0	0	0	0	0	0	0	0	0	0	0	0	0	0	0	0.00978761	0	0	0	0	0
373	Enhydrobacter	0	0	0	0	0	0	0	0	0	0	0	0	0	0	0.048938	0	0	0	0	0	0	0	0	0	0	0	0.00978761	0	0	0	0	0	0	0	0	0	0	0.0587257	0.00978761	0	0	0	0	1.59538	0.0195752	0	0	0
374	Prevotella	0.0391504	0.0195752	0.0195752	0	0.00978761	0	0.0685133	0.0685133	0.0685133	0.00978761	0	0	0.0685133	0.00978761	0	0.0391504	0.0293628	0.0978761	0.0783009	0	0.0293628	0	0.0685133	0.156602	0.0783009	0	0	0.0587257	0.0978761	0	0	0.0685133	0.0391504	0	0	0	0	0.0195752	0	0.0685133	0	0	0	0	0	0	0	0
375	Porphyromonas	0	0	0	0	0	0	0	0	0	0	0	6.96878	0	0	0	0	0	0	0	0	0	0	0	0	0	0	0	0	0	0	0	0	0	0	0	0	0	0	0	0	0	0	0.048938	0	0	0	0	0
376	Tannerella	0.048938	0	0.0685133	0	0.00978761	0	0.0391504	0	0	0	0.0783009	0	0	0.00978761	0.00978761	0	0.0587257	0	0.146814	0.00978761	0.0783009	0.0195752	0	0.0293628	0.00978761	0	0.0195752	0	0	0	0.0391504	0	0	0	0	0	0	0	0	0.166389	0	0	0.0195752	0	0	0.0391504	0	0
377	Streptococcus	0.00978761	0	0.0880885	0.0293628	0.0195752	0.0293628	0	0.0293628	0.0391504	0	0.00978761	0	0.0978761	0	0	0	0.0978761	0	0	0.0587257	0.0195752	0.0978761	0	0.0783009	0.0587257	0.0587257	0.0195752	0.00978761	0.00978761	0.048938	0.0783009	0.0293628	0.0587257	0	0.0195752	0	0	0	0.225115	0.24469	0	0.0293628	0.048938	0	0	0.0195752	0.0685133	0.0783009
378	Micrococcus_sp.	0	0	0	0.0195752	0	0	0.0293628	0	0	0	0	0	0	0	0.00978761	0	0	0	0	0	0	0	0	0	0	0	0	0	0	0	0	0	0	0.0293628	0.00978761	0.0195752	0	0.127239	0	0	0	0	0.00978761	0.225115	0	0.0195752	0	0
379	Streptococcus_intermedius	0.00978761	0	0	0	0	0.0195752	0.00978761	0	0.00978761	0	0	0.0195752	0.048938	0	0	0	0.0587257	0	0.0783009	0.166389	0.048938	0.195752	0	0.156602	0.0195752	0.00978761	0.107664	0.0391504	0	0.0391504	0.0685133	0	0.107664	0.00978761	0.0587257	0.0195752	0	0.0685133	0.0195752	0.117451	0	0.0293628	0.0783009	0	0.0978761	0.00978761	0.0685133	0
380	Roseburia_faecis	0	0	0	0	0	0	0.0587257	0	0	0	0	0.00978761	0	0.0685133	0	0	0	0	0	0	0	0	0	0	0	0.00978761	0.00978761	0	0	0	0	0	0	0	0	0	0.00978761	0.0978761	0	0	0	0	0	2.32945	0	0.00978761	0.0195752	0
381	Staphylococcus_warneri_or_pasteuri	0	0	0	0	0	0.0293628	0.0293628	0	0	0	0	0.636195	0	0	0	0	0	0	0	0	0	0	0	0	0.00978761	0	0	0	0	0	0	0	0	0	0.00978761	0.322991	0	0.0195752	0	0	0.0880885	0.00978761	0	0.225115	0	0	0	0
382	Fusobacterium	0	0	0	0.00978761	0	0	0.0783009	0	0	0	0	0	0	0.00978761	0	0	0	0.0195752	0	0.0195752	0	0	0	0	0	0	0.00978761	0.714495	0	0.0293628	0.0293628	0.00978761	0	0	0	0	0	0.00978761	0	0	0	0	0	0	0	0	0.0293628	0
383	Neisseria	0	0	0	0	0	0	0	0	0.0195752	0	0.264265	0	0	0	0	0	0	0	0	0	0	0	0	0	0	0	1.83028	0	0	0	0	0.00978761	0	0	0	0	0	0	0	0	0	0	1.22345	0	0.00978761	0	0	0
384	Streptococcus	0	0	0	0	0	0.00978761	0.00978761	0.69492	0.0391504	0	0	0	0	0	0	0	0	0.00978761	0	0	0.00978761	0	0	0.567681	0.048938	0	0	0	0	0	0.0195752	0	0	0.264265	0.0195752	0	0	0	0.117451	0.93961	0	0	0	0	0	0	0.00978761	0
385	Actinomyces	0.048938	0	0.0783009	0.0195752	0.0195752	0	0.0293628	0.00978761	0	0	0	0	0.00978761	0.0195752	0	0	0.303416	0.0978761	0.0587257	0	0.137027	0	0	0	0	0	0	0	0	0.127239	0.048938	0	0.215327	0.342566	0.166389	0	0.0783009	0.00978761	0	0	0.0195752	0.0293628	0	0.00978761	0	0.048938	0.0195752	0
386	Streptococcus	0	0	0.00978761	0	0	0	0	0	0	0.107664	0	0	0.00978761	0	0	0.0293628	0	0	0	0	0	0	0	0	0.0195752	1.37027	0	0	0	0.0195752	0	0.0391504	0	0	0.00978761	0	0	0	0	0	0	0.763433	0.0685133	0	0	0	0	0.0685133
387	Propionibacterium_acidifaciens	0	0.00978761	0.0195752	0	0	0	0.00978761	0	0	0	0	0	0	0	0	0	0	0.00978761	0.048938	0.0293628	0.0195752	0	0	0.0195752	0	0	0.0293628	0	0	0.401292	0.0195752	0.0195752	0	0	0.0783009	0	0.107664	0	0	0	0	0	0	0	0.0293628	0.127239	0.313203	0.0391504
388	Propionibacteriaceae	0	0.20554	0	0	0	0	0	0	0.00978761	0	0	0	0	0	0	0	0	0.137027	0	0	0	0	0	0	0.0391504	0	0	0.00978761	0	0	1.08642	0	0	0.264265	0	0	0	0	0.00978761	0.00978761	0	0	0	0	0	0	0.430655	0
390	Actinomyces	0.00978761	0	0	0	0	0	0.0587257	0	0	0	0	0	0	0	0	0	0	0.0293628	0	0	0.0195752	0	0.107664	0	0	0	0	0	0	0	0	0	0	0.0978761	0	0	0.048938	0	0	0	0	0	0	0.00978761	0	0	0	0
391	Streptococcus	0	0	0.704708	0	0	0	0.0195752	0	0	0	0	0	0	0	0.0293628	0	0	0	0.420867	0	0	0	0	0	0	0	0	0	0	0.048938	0	0	0	0	0.910248	0	0	0	0	0	0	0	0	0	0	0.117451	0	0
392	Fusobacterium	0	0	0.0685133	0	0	0	0	0	0.0880885	0.0293628	0	0	0	0	0	0	0.0783009	0	0.107664	0	0.0293628	0	0	0	0.195752	0.24469	0	0.156602	0	0	0.166389	0	0	0.00978761	0	0	0	0	0	0	0	0.0978761	0	0	0	0	0.00978761	0
393	Escherichia_or_Shigella	0	0	0	0	0	0	0.391504	0	0	0.00978761	0	0	0	0	0.0195752	0	0	0	0	0	0	0.00978761	0	0.0293628	0	0	0	0	0	0	0	0	0	0.00978761	0.00978761	0	0	0.0293628	0	0.00978761	0.0783009	0	0	0.0391504	0	0.00978761	0	0
394	Corynebacterium_segmentosum	0	0	0	0	0	0	0.107664	0	0	0	0	0	0	0	0.0293628	0	0	0	0	0	0	0	0	0	0	0	0	0	0	0	0	0	0	0	0	0.00978761	0	0.0391504	0	0	0	0	0	0.225115	0.00978761	0	0	0.0293628
395	Prevotella	0	0	0.137027	0	0	0	0	0	0	0	0	1.4975	0	0	0	0	0	0	0.274053	0	0	0.0195752	0	0	0	0	0	0	0	0	0	0	0	0	0	0.0783009	0	0	0	0	0	0	0	0	0	0	0	0
396	Campylobacter	0.254478	0.0391504	0.127239	0	0	0	0	0	0	0.577469	0	0	0.00978761	0	0	0	0.0587257	0	0.048938	0	0	0	0.107664	0	0	0.0195752	0	0	0	0	0	0	0.0978761	0	0	0	0	0	0	0	0	0	0	0	0	0	0	0
397	Streptococcus	0.195752	0	0	0.0978761	0	0	0.00978761	0	0.332779	0	0	0	0	0	0	0	0.69492	0	0	0	0	0	0	0.00978761	0.215327	0	0	0	0	0	0	0.00978761	0.665557	0	0	0	0	0.0195752	0.342566	0	0	0	0	0	0	0	0.00978761	0
398	Streptococcus	0	0	0	0.00978761	0	0	0.00978761	0	0	0	0.0587257	0	0	0	0	0.137027	0	0	0	0.00978761	0	0	0	0	0	0	0.166389	0.00978761	0	0	0	0	0	0.107664	0	0	0	0	0	0	0	0	0.195752	0	0	0	0	0.00978761
399	Acinetobacter	0	0	0	0	0	0	0	0	0	0	0	0	0	0	0	0	0	0	0	0	0	0	0	0	0	0	0	0	0	0	0	0	0	0	0	0	0	0	0	0	0	0	0	0.0293628	0	0.00978761	0	0
400	Streptococcus	0	0	0	0	0	0	0.0391504	0	0.166389	0	0	0	0	0	0	0	0	0	0	0	0	0.00978761	0	0	0.988548	0	0	0	0	0	0	0	0	0	0	0	0	0.00978761	2.71117	0	0	0	0	0	0	0	0	0
401	Escherichia_or_Shigella	0	0	0	0	0	0	0	0	0	0	0	0	0	0	0	0	0	0	0	0	0.00978761	0	0	0	0	0	0	0	0	0	0	0	0	0	0	0	0	0.0195752	0	0	0	0	0	0	0	0	0	0
402	Pasteurellaceae	0	1.11579	0	0	0	0	0	0	0	0	0.00978761	0.048938	0	0	0	0.127239	0.0783009	0.0195752	0	0	0	0	0	0	0	0	0.0685133	0.0685133	0	0.00978761	0	1.52687	0.0587257	0	0	0	0	0	0	0	0	0	0.00978761	0	0	0	0	1.28218
403	Propionibacterium	0	0	0	0	0	0	0.00978761	0	0	0	0	0.225115	0	0	0.0880885	0	0	0	0	0	0	0	0	0	0	0	0	0	0	0	0	0	0	0	0.00978761	0.0880885	0	0.127239	0.0293628	0	0.45023	0	0	1.9771	0.0587257	0.0195752	0	0
404	Streptococcus	0	0	0	0	0.0391504	0	0	0	0	0	0.0293628	0	0	0	0	0	0.00978761	0	0.0391504	0	0.0880885	0.0195752	0	0	0.0293628	0.00978761	0	0	0	0.00978761	0	0.00978761	0.0293628	0	0.137027	0.048938	1.00812	0.0391504	0.00978761	0	0	0.0685133	0	0	0.137027	0	0	0
405	Anaerococcus	0	0	0	0	0	0	0	0	0	0	0	0	0	0	0	0	0	0	0	0	0	0	0	0	0	0	0	0	0	0	0	0	0	0	0	0	0	0.048938	0.00978761	0	0	0	0	0	0	0	0	0
406	Streptococcus	0	0	0	0	0.00978761	0	0	0	0	0	0	0	0	0	0	0.0195752	0	0	0	0	0.0587257	0	0	0	0	0.0293628	0	0	0	0	0	0.0783009	0	0	0	0	0.0195752	0	0.0195752	0	0	0.00978761	0	0	0	0	0	0.146814
407	Streptococcus	0	0	0	0.0880885	0	0	0.0391504	0	0.00978761	0	0.0293628	0	0.00978761	0	0	0.0195752	0	0	0	0.225115	0.0391504	0	0	0	0.0293628	0	0.048938	0	0	0	0	0.0195752	0	0	0	0.0195752	0	0	0.048938	0.0293628	0.0685133	0	0.107664	0	0	0	0	0.0685133
408	Lactobacillus_crispatus	0	0	0	0	0.0587257	0.00978761	0	0	0	0	0	0	0	0	0	0	0	0	0.166389	0.00978761	0.225115	0	0	0	0	0	0	0	0	0	0	0	0	0	0.665557	0	0	0	0	0	0	0	0	0.215327	0.0195752	0	0	0
409	Moryella	0.00978761	0.00978761	0	0	0.00978761	0	0	0	0	0	0	0	0	0	0	0.0195752	0.00978761	0.137027	0	0	0.00978761	0	0.00978761	0	0	0	0	0	0.00978761	0	0.048938	0.0978761	0.0293628	0.0391504	0	0	0	0.00978761	0	0	0	0	0	0	0	0	0	0.0391504
410	Lachnoanaerobaculum	0	0	0	0	0	0	0	0	0	0	0	0	0	0	0	0	0	0	0	0	0	0	0	0	0	0	0	0.00978761	0	0	0	0	0	0	0	0	0	0	0	0	0	0	0	0	0	0	0	0
411	Porphyromonas	0	0	0.176177	0	0	0	0	0	0	0	0	0	0	0	0.792796	0	0	0	1.56602	0	0	0	0	0	0	0	0	0	0	0	0.391504	0	0	0	0	0	0	0	0	0	0	0	0	0	0	0	0.264265	0
412	Lachnoanaerobaculum	0	0	0	0	0	0	0	0	0	0	0	0	0	0	0	0	0	0	0	0	0	0	0	0	0	0	0	0	0	0	0	0	0	0	0	0	0	0	0	0	0	0	0	0	0	0	0	0
413	Flavobacteriaceae	0	0.00978761	0	0.225115	0	0	0	0	0.0293628	0.00978761	0	0	0.0195752	0.234903	0.00978761	0.0685133	0.0195752	0.137027	0	0	0	0	0.00978761	0	0.0587257	0	0	0	0	0.0195752	0.0685133	0.0293628	0.0685133	0	0	0.0391504	0	0	0	0	0	0	0	0	0	0	0	0
414	Bifidobacterium	0.0587257	0	0.137027	0	0.0978761	0	0.048938	0	0.00978761	0.0587257	0	0	0	0	0	0	0	0	0.00978761	0	0.107664	0.00978761	0	0	0	0.048938	0	0	0	0.0195752	0	0	0	0	0.968973	0.724283	0.440442	0.117451	0.0195752	0	0.107664	0.0195752	0	0	0	0.00978761	0	0
416	Veillonella	0	0	0.0783009	0.391504	0.00978761	0	0.137027	0	0.0391504	0.117451	0.00978761	0	0.048938	0.0293628	0	0.0293628	0	0	0	0.195752	0	0	0.127239	0	0	0.0587257	0	0.0195752	0.0587257	0.0195752	0	0.0195752	0	0	0.00978761	0.20554	0	0	0	0	0.048938	0.107664	0	0	0	0.048938	0	0
417	Alloprevotella	0	1.94773	0	0	0	0	0.00978761	0	0	0	0	0.048938	0	0	0.528531	0	0	0.264265	0	0	0	0	0	0.00978761	0	0	0	0	0	0	0.185965	0	0	0	0	0	0	0	0	0	0	0	0	0	0	0	0.0783009	0
418	Streptococcus	0	0.00978761	0	0	0	0	0	0	0	0	0.41108	0	0	0	0	0.00978761	0	0.0195752	0	0	0	0	0.00978761	0	0	0	0.460018	0	0	0	0	0	0	0.254478	0	0	0	0	0	0	0	0	0.538318	0	0	0	0	0
419	Prevotellaceae	0	0	0	0	0	0	0	0	0.00978761	0	0.195752	0.00978761	0	1.12558	0.0195752	0	0	0	0	0	0	0	0	0	0	0	0.528531	0	0	0.156602	0.0391504	0	0	0	0	0	0	0	0	0	0	0	0.137027	0	0	0	0.0293628	0
420	Actinomyces_naeslundii	0	0	0.0195752	0	0.00978761	0	0	0.0391504	0	0	0	0	0.0391504	0	0	0.00978761	0	0	0.0195752	0.00978761	0.00978761	0	0	0.0195752	0.00978761	0	0	0.00978761	0	0	0	0.00978761	0	0	0.0195752	0	0.117451	0.0293628	0.127239	0.0587257	0	0.00978761	0	0.107664	0	0	0	0
421	Neisseria_oralis	0	0.0391504	0	0	0.00978761	0	0.606832	0	0.00978761	0.0195752	0	0	0.0293628	0	0.117451	0	0	0.0293628	0	0	0	0	1.2626	0.048938	0.00978761	0.0783009	0	0.0685133	0.146814	0	0.69492	0	0	0	0	0	0	0	0	0.0293628	0	0.0783009	0.0195752	0	0.00978761	0	0.20554	0
422	Gemella	0	0	0	0	0	0	0	0	0	0	0.0685133	0	0.00978761	0	0	0	0	0	0	0	0	0	0	0	0	0	0.362142	0	0	0	0	0	0	0.0195752	0	0	0	0	0	0.0195752	0	0.00978761	0.254478	0	0.0293628	0	0.00978761	0
423	Prevotella	0.0293628	0	0.107664	0.117451	0	0	0	0	0.0391504	0.117451	0	0	0.283841	0.048938	0	0.137027	0	0	0.176177	0.460018	0.00978761	0.00978761	0	0	0.0880885	0.0293628	0	0	0.45023	0.0293628	0.00978761	0.352354	0.00978761	0	0	0.137027	0	0	0	0	0	0	0	0	0	0.00978761	0	0
424	Fusobacterium	0	0.00978761	0	0.0195752	0	0	0	0	0	0.00978761	0	0	0	0	0	0	0	0.107664	0	0.0195752	0	0	0	0.0195752	0	0	0	0	0	0	0	0	0	0.0587257	0	0	0	0	0	0.0587257	0	0.0391504	0	0	0	0	0	0
425	Leptotrichia	0	0	0	0.0195752	0.00978761	0	0	0	0.00978761	0	0.24469	0	0	0	0	0	0.048938	0	0	0.107664	0	0	0	0	0.127239	0	0.254478	0	0	0	0.0978761	0	0.0195752	0	0	0	0	0	0	0	0	0	0.871097	0	0	0	0.0293628	0
426	Prevotella	0	0	0	0	0	0	0	0	0	0	0	0	0	0	0	0	0	0	0	0	0	0	0	0	0	0	0	0	0	0	0	0	0	0	0	0	0	0	0	0	0	0	0	0	0	0	0	0
427	Actinomyces	0	0	0.303416	0.0880885	0	0	0	0	0	0	0	0	0	0	0	0	0	0	0.264265	0.127239	0	0	0	0	0	0	0	0	0	0	0	0	0	0	0.616619	0.137027	0	0	0	0	0.107664	0	0.0195752	0	0	0	0	0
428	Gemella	0	0	0	0	0	0	0.0391504	0	0.0195752	0	0	0	0.048938	0	0	0.00978761	0	0.0195752	0	0	0	0	0	0	0.127239	0	0	0.0293628	0.0195752	0	0.0195752	0.0293628	0.00978761	0	0	0	0	0.166389	0	0.048938	0	0	0	0.0195752	0.391504	0.00978761	0.127239	0.0195752
429	Veillonellaceae	0	0	0.20554	0	0	0	0	0	0	0	0	0	0	0	0	0	0	0	0.0587257	0	0	0	0	0	0	0	0	0	0	0	0.0195752	0	0	0	0.0391504	0	0	0	0	0	0	0	0	0	0	0	0	0
430	Leptotrichia	0.548106	0	0.185965	0	0.0293628	0.0195752	0	0	0	0	0	0	0	0	0	0	0.48938	0	0.342566	0	0	0	0	0.0195752	0	0	0	0	0	0	0.0293628	0	0.117451	0	0	0	0	0	0	0.0783009	0	0	0	0	0	0	0.0880885	0
431	Gemella	0	0	0	0	0.274053	0.166389	0.0391504	0	0	0.0783009	0	0	0	0	0	0	0	0	0	0	0.156602	0.548106	0	0	0	0.362142	0	0	0	0	0	0	0	0	0	0	0.195752	0.264265	0	0	0	0.460018	0	0	0	0	0	0
432	Gemella	0	0	0	0	0	0.0880885	0.00978761	0	0	0	0	0	0	0	0	0	0	0	0	0	0	0.0391504	0	0	0	0	0.763433	0	0	0.0195752	0	0	0	0	0	0	0	0.00978761	0	0	0	0	0.724283	0.00978761	0	0	0	0
433	Abiotrophia	0	0.048938	0	0	0	0	0	0.0587257	0.0293628	0	0.00978761	0	0	0.185965	0	0	0	0	0	0	0	0	0	0	0.0587257	0	0	0	0.00978761	0.48938	0.048938	0	0	0.0195752	0	0	0	0	0.137027	0.00978761	0	0	0.00978761	0	0	0.499168	0.0880885	0
434	Treponema	0	0	0	0	0	0	0.107664	0	0	0	0.518743	0	0	0.24469	0	0	0	0	0	0	0	0	0.45023	0	0	0	0.293628	0	0	0	0	0	0	0.00978761	0	0	0	0	0	0	0	0	0.048938	0	0	0	0	0
435	Leptotrichiaceae	0	0.0391504	0.00978761	0.0195752	0	0	0	0	0.0293628	0.0293628	0.0293628	0	0.00978761	0.0195752	0	0	0.0195752	0.048938	0	0.0293628	0.00978761	0	0	0	0.0587257	0	0.0195752	0.048938	0	0.0587257	0.0880885	0	0	0.0195752	0	0	0	0	0	0	0	0	0.0391504	0	0	0	0.0587257	0
436	Serratia	0	0.00978761	0	0	0	0	0.00978761	0	0	0	0	0	0	0	0.0293628	0	0	0	0	0	0	0	0	0	0	0	0	0	0	0	0	0	0	0	0.00978761	0.0195752	0	0	0	0	0.822159	0	0	0	0	0.0195752	0	0
437	Prevotella	0	0	0.0685133	0	0.00978761	0	0.00978761	0	0.00978761	0	0.283841	0	0.0391504	0	0.0391504	0	0	0.0685133	0.0880885	0	0.0880885	0	0	0	0	0	0.195752	0	0.0293628	0	0.117451	0	0	0	0	0	0	0	0	0	0	0	0.176177	0	0	0.0391504	0.00978761	0
438	Neisseria	0	0	0	0	0	0	0	0	0	0	0.0391504	0	0	0.0195752	0	0	0	0	0	0	0	0	0	0	0	0	0.00978761	0.0195752	0	0	0.00978761	0	0	0	0	0	0	0	0	0	0	0	0	0	0	0	0.00978761	0
439	Filifactor_alocis	0	0.0391504	0.127239	0	0	0	0	0	0	0	0	0	0	0	0	0	0	0.460018	0.156602	0	0	0	0	0	0	0	0	0	0	0	0	0	0	0	0	0	0	0	0	0	0	0	0	0	0	0	0	0
440	Streptococcus	0	0	0	0	0	0	0	0	0	0	1.37027	0	0	0	0	0	0	0	0	0	0	0	0	0	0	0	0.626407	0	0	0	0.0391504	0	0	0	0	0	0	0	0	0	0	0	1.32133	0	0.00978761	0.00978761	0.00978761	0
441	Gemella	0	0	0	0	0	0	0	0.00978761	0.0587257	0	0	0	0	0	0	0	0	0.0195752	0	0.00978761	0	0	0	0.0293628	0.959186	0.00978761	0	0	0.00978761	0.00978761	0.0685133	0	0	0.0195752	0	0	0	0.00978761	0.0685133	0.048938	0	0.048938	0.00978761	0	0.048938	0	0	0
442	Corynebacterium	0	0.00978761	0	0	0	0	0	0	0	0	0	0.342566	0	0	0.00978761	0	0	0	0	0	0	0	0	0	0	0	0	0	0	0	0	0	0	0	0.00978761	0.00978761	0	0.0293628	0	0	0	0	0.00978761	0.0195752	0	0	0	0
443	Pasteurellaceae	0	0	0	0	0	0.910248	0.127239	0	0	0	0	0	0	0	0	0	0	0	0	0	0	0.577469	0	0	0	0	0	0	0	0	0	0	0	0	0	0.0195752	0.0195752	0.0685133	0	0	0	0	0	0	0	0	0	0
444	Capnocytophaga_granulosa	0	0	0	0	0	0.0293628	0.048938	0	0.0195752	0	0.499168	0	0	0.0783009	0	0.048938	0.048938	0.0293628	0.0195752	0	0.0587257	0	0	0.264265	0.166389	0	0.313203	0	0	0.0587257	0.00978761	0.0293628	0.0587257	0	0.0195752	0	0	0	0	0.127239	0	0	0.00978761	0	0	0	0	0
445	Actinomyces	0	0.0195752	0	0	0.0195752	0	0	0	0	0	0	0	1.46814	0	0	0	0	0.00978761	0	0	0	0	0	0	0	0	0	0	0.195752	0	0	0	0	0.0783009	0	0	0	0.0195752	0	0	0	0	0	0.00978761	1.106	0.0587257	0	0
447	Noviherbaspirillum	0	0	0	0	0	0	0	0	0	0	0	0	0	0	0	0	0	0	0	0	0	0	0	0	0	0	0	0	0	0	0	0	0	0	0	0	0	0	0	0	0	0	0	0	0	0	0	0
448	Propionibacteriaceae	0	0	0	0	0	0	0	0	0	0	0	0	0.0391504	0	0	0	0.0195752	0	0	0	0	0.0195752	0	0	0.0195752	0	0.00978761	0.0391504	0.0195752	0.0195752	0.0293628	0.0880885	0	0.0293628	0	0	0	0	0	0	0	0	0.0195752	0	0.117451	0	0.0587257	0.0293628
449	Porphyromonas	0	0	0	0	0	0	0.0293628	0	0	0	0	0	0	0	0	0	0	0	0	0	0	0	0	0	0	0	0	0	0	0	0	0.00978761	0	0	0	0	0	0	0	0	0	0.00978761	0	0	0	0	0	0
450	Leptotrichia	0	0	0.0587257	0	0.00978761	0	0	0	0	0.0783009	0	0	0.0391504	0	0	0	0	0	0	0.0195752	0.176177	0	0	0.00978761	0.0293628	0.048938	0	0	0.0391504	0.215327	0	0	0	0	0	0	0	0	0	0.0293628	0	0.0195752	0	0	0	0.00978761	0	0.00978761
451	Acinetobacter	0	0	0	0.0195752	0	0	0.0195752	0	0	0	0	0	0	0	0	0	0	0	0	0	0	0	0	0	0	0	0	0	0	0	0	0	0	0.00978761	0.00978761	0.0293628	0	0.00978761	0	0	0.362142	0	0	1.13536	0.0587257	0.00978761	0	0
452	Porphyromonas_uenonis	0	0	0.0293628	0	0	0	0.24469	0	0	0	0	0	0	0	0	0	0	0	0	0	0	1.67368	0	0.0293628	0.048938	0	0	0	0	0	0	0	0	0	0	0	0	0.137027	0	0.0195752	0	0	0	0.00978761	0	0	0	0
453	Lactobacillus	0	0	0.45023	0.00978761	0.381717	0	0.0587257	0	0	0	0	0	0	0	0	0	0	0	0.714495	0	0.342566	0.293628	0	0	0.00978761	0	0	0	0	0	0	0	0	0	0.968973	0	0	0.127239	0	0	0.0685133	0	0	0	0	0.0293628	0	0
454	Prevotella	0	0.577469	0	0	0	0.00978761	0	0	0	0	0	0	0	0	0.0195752	0	0	2.212	0	0	0	0	0	0	0	0	0	0	0	0	0.0391504	0	0.0293628	0.0293628	0	0	0	0	0	0	0	0	0.00978761	0	0	0	0	0
455	Streptococcus_dysgalactiae	0	0	0	0	0	0	0	0	0	0	0	0	0	0	0	0	0	0	0	0	0.0195752	0	0	0	0	0	0	0	0	0	0	0	0	0	0	0	0	0.0195752	0	0	0	0	0	0	0	0	0	0
456	Actinomyces	0	0	0	0	0	0	0	0	0	0	0	0	0	0	0	0	0	0	0	0	0	0	0	0	0	0	0	0	0	0	0	0	0	0	0	0	0	0	0	0	0	0	0	0	0	0	0	0
457	Clostridium_XVIII	0	0.00978761	0	0	0	0	0.00978761	0	0	0	0	0	0	0	0	0	0	0	0	0	0	0	0	0	0	0	0	0	0	0	0.00978761	0	0	0	0	0	0	0	0.0391504	0	0	0	0	0.0195752	0	0	0	0
458	Escherichia_or_Shigella	0	0	0	0	0	0	0	0	0	0.00978761	0.00978761	0	0	0	0	0	0	0	0	0	0	0.0195752	0	0	0	0.949398	0	0	0	0	0	0	0	0	0	0	0	0	0	0	0	0.685133	0	0.195752	0	0	0	0
459	Atopobium	0	0	0	0	0	0	0	0	0.00978761	0	0	0	0	0	0	0	0	0	0	0	0	0	0	0	0.0391504	0	0	0	0	0	0	0	0	0	0	0	0	0	0	0	0	0	0	0	0	0	0	0
460	Parvimonas	0	0.127239	0	0	0	0	0	0	0	0	0	0.00978761	0	0	0	0	0	0.41108	0	0	0	0	0	0	0	0	0	0	0	0	0	0	0	2.14349	0	0	0	0	0	0	0	0	0	0.0391504	0	0	0	0
462	Prevotella	0	0.117451	0	0	0	0	0.117451	0	0	0	0.00978761	0	0	0	1.68347	0.0195752	0	0.0587257	0	0.0783009	0	0.391504	0	0.0195752	0	0	0.00978761	0	0	0	0.352354	0.00978761	0	0	0	0	0	0.00978761	0	0.00978761	0	0	0.0391504	0	0	0	0.107664	0.00978761
463	Sphingomonas	0	0	0	0	0	0	0	0	0	0	0	0	0	0	0	0	0	0	0	0	0	0	0	0	0	0	0	0	0	0	0	0	0	0	0.00978761	0	0	0.0195752	0	0	0.166389	0	0	0	0	0	0	0.00978761
464	Staphylococcus	0	0	0	0	0	0	0	0	0	0	0	0	0	0	0	0	0	0	0	0	0	0	0	0	0	0	0	0	0	0	0	0	0	0	0	0	0	0.430655	0	0	0	0	0	0	0	0	0	0
465	Schlegelella_thermodepolymerans	0	0	0	0	0	0	0	0	0	0	0	0	0	0	0	0	0	0	0	0	0	0	0	0	0	0	0	0	0	0	0	0	0	0	0	0	0	0	0	0	0	0	0	0	0	0	0	0
466	GpI	0	0	0	0	0	0	0	0	0	0	0	0	0	0	0	0	0	0	0	0	0	0	0	0	0	0	0	0	0	0	0	0	0	0.0293628	0	0.0293628	0	0.0195752	0.00978761	0	0.0783009	0	0	0.0195752	0	0	0	0
467	Streptococcus	0	0	0.0293628	0	0	0	0.0195752	0	0.0783009	0	0	0	0	0.0685133	0	0	0	0	0.0293628	0	0	0	0	0	0.107664	0.00978761	0	0	0	0.0880885	0	0	0	0	0.0195752	0	0	0	0.0391504	0	0	0	0	0	0	0.00978761	0	0
468	Porphyromonadaceae	0	0	0	0	0	0	0	0	0	0	0.0195752	0	0	0	0.00978761	0	0	0	0	0	0.00978761	0	0	0.048938	0	0	0	0.792796	0	0	0	0	0	0	0	0	0	0	0	0.283841	0	0	0	0.00978761	0	0	0	0
469	Bacteroides_xylanisolvens	0	0	0	0	0	0	0	0.00978761	0	0	0	0	0	0.00978761	0	0	0	0	0	0	0	0	0	0	0	0	0	0	0.0195752	0.00978761	0	0	0	0.00978761	0	0	0	0	0	0	0	0	0	0.0783009	0.00978761	0.00978761	0	0
470	Flavobacteriaceae	0	0	0	0	0	0	0	0	0	0	0	0	0	0	0	0	0	0	0	0	0	0	0	0	0	0	0	0	0	0	0	0	0	0	0	0	0	0	0	0	0	0	0	0	0	0	0	0
471	Actinomycetales	0	0	0	0	0	0	0.0685133	0	0	0	0	0.24469	0	0	0	0	0	0	0	0	0	0	0	0	0	0	0	0	0	0.0293628	0	0	0	0	0	0.0880885	0	0.0783009	0	0	0	0	0	0.332779	0	0.0195752	0	0.00978761
472	Prevotella	0	0	0	0	0	0	0.0195752	0	0.127239	0.176177	0	0	0.234903	0	0	0	0	0	0	0	0	0	0.0195752	0	0.146814	0.0293628	0	0	0.401292	0	0	0	0	0	0	0	0	0.048938	0	0	0	0.0293628	0	0	0	0.0391504	0	0
473	Corynebacterium	0	0	0.156602	0	0	0	0	0	0	0	0	0	0	0	0	0	0	0	0.24469	0	0	0	0	0.048938	0	0	0	0	0	0.0391504	0	0.00978761	0	0	0.274053	0	0	0	0	0.048938	0.0293628	0	0	0	0	0	0	0
474	Treponema_sp.	0	0	0	0	0	0	0	0.283841	0.0587257	0	0	0	0	0	0.0685133	3.58226	0	0	0	0	0.00978761	0	0	0.0685133	0.107664	0	0	0	0	0	0.0685133	0.254478	0	0	0	0	0	0	0	0.0195752	0	0	0	0	0	0	0	0
475	Treponema	0	0	0	0	0	0	0	0	0	0	0	0	0	0	0	0	0	0	0	0	0	0	0	0	0	0	0	0	0	0	0	0	0	0	0	0	0	0	0	0	0	0	0	0	0	0.0391504	0	0
476	Rhizobium_radiobacter	0	0	0	0	0	0	0	0	0.00978761	0	0	0	0	0	0	0	0	0	0	0	0	0	0	0.00978761	0	0	0	0	0	0	0	0	0	0	0	0	0	0.0293628	0	0	0.117451	0	0	0	0	0	0	0.127239
477	Fusobacterium	0.0293628	0	0.00978761	0.146814	0.0195752	0	0	0	0.0195752	0	0.0685133	0	0.048938	0.0978761	0.0293628	0.00978761	0.0783009	0.0978761	0	0.0293628	0.0195752	0	0.00978761	0	0.00978761	0	0.137027	0.322991	0.00978761	0.00978761	0.176177	0	0	0.0195752	0	0	0	0	0	0	0	0	0.0293628	0	0	0	0.00978761	0
478	Lachnospiraceae	0	0	0.00978761	0	0	0	0.0880885	0	0	0.00978761	0	0	0	0.00978761	0.00978761	0	0	0	0	0	0	0	0	0	0	0	0	0	0	0	0.00978761	0	0	0	0	0.117451	0	0.0978761	0	0	0.0391504	0	0.00978761	0.528531	0	0.00978761	0	0
479	Fusobacterium_nucleatum	0	0	0	0	0	0	0	0	0	0	0	0	0	0	0	0	0	0	0	0	0	0	0	0	0	0	0	0	0	0	0.20554	0	0	0	0	0	0	0	0	0	0	0	0	0	0	0	0	0
480	Pasteurellaceae	0	0	0	0	0.704708	0	0	0	0.0293628	0	0	0	0	0	0	0.146814	0	0	0	0	0.264265	0	0	0	0	0	0	0	0	0	0	1.46814	0	0	0	0	0	0	0	0	0	0	0	0	0	0	0	1.47793
481	Megasphaera	0.0195752	0.0293628	0.0783009	0	0.0195752	0	0	0	0.0195752	0	0	0	0.0293628	0	0	0.0391504	0.0293628	0.00978761	0.0195752	0	0.00978761	0	0.00978761	0	0	0	0	0	0.0587257	0	0	0	0.0391504	0	0.00978761	0	0	0.0391504	0	0	0	0	0	0	0	0	0	0
482	Peptococcus	0	0.0685133	0	0	0	0	0	0	0	0	0.0783009	0	0	0	0	0	0	0.362142	0	0	0	0	0	0	0	0	0.146814	0	0	0	0	0	0	1.20388	0	0	0	0	0	0	0	0	0.0391504	0.0195752	0	0	0	0
483	Streptococcus	0	0	0	0	0	0	0.0195752	0	0	0	0.0587257	0	0	0	0	0	0	0	0	0	0	0	0	0	0	0	0.048938	0.0293628	0	0	0	0	0	0	0	0	0	0	0	0	0	0	0.00978761	0.0195752	0	0	0	0
484	Microbacteriaceae	0	0	0	0	0	0	0	0	0	0	0	0	0	0	0	0	0	0	0	0	0	0	0	0	0	0	0	0	0	0	0	0	0	0	0	0	0	0	0	0	0	0	0	0	0	0	0	0
485	Veillonella	0	0	0.283841	0.0293628	0	0	0.00978761	0.0587257	0.0391504	0.274053	0	0	0.0587257	0.00978761	0	0	0	0	0.00978761	0.00978761	0	0	0	0.0195752	0.00978761	0	0	0	0	0	0	0	0	0	0	0	0	0.00978761	0	0	0	0.00978761	0	0	0	0	0.00978761	0
486	Actinobaculum	0.127239	0	0	0	0.0783009	0	0	0	0.0195752	0	0	0	0.00978761	0	0	0.0391504	0.0391504	0.0195752	0	0.00978761	0.117451	0	0	0	0.0293628	0	0	0	0.00978761	0.048938	0	0.0783009	0.0391504	0.381717	0.0391504	0.00978761	0.303416	0.00978761	0.0685133	0	0	0	0.00978761	0	0.0783009	0.00978761	0.0195752	0.0685133
487	Treponema	0	0	0	0	0	0	0	0	0	0	0	0	0	0	0	0	0.00978761	0	0	0	0	0	0	0	0	0	0	0	0	0	0.048938	0	0	0	0	0	0	0	0	0	0	0	0	0	0	0	0	0
488	Actinomyces	0	0	0	0	0	0	0.00978761	0	0	0	0	0	0	0	0	0	0	0	0	0	0	0	0	0	0	0	0	0.00978761	0	0	0	0	0	0	0	0	0	0	0	0	0	0	0.00978761	0	0	0	0	0
489	Streptococcus	0	0	0	0	0	0	0	0	0	0	0	0	0	0	0	0	0	0	0	0	0	0	0	0	0	0	0	0	0	0	0	0	0	0	0	0	0	0	0	0	0	0	0	0	0	0	0.00978761	0
490	Prevotella_baroniae	0	0.460018	0.0293628	0	0	0	0	0	0	0	0	0	0	0.460018	0	0	0.0195752	0.127239	0.0195752	0	0	0	0	0	0	0	0	0	0	0.606832	0	0	0.00978761	0	0	0	0	0	0	0	0	0	0	0	0	0	0	0
491	Streptococcus	0	0	0	0	0	0	0.0195752	0	0	0.0880885	0	0	0	0	0	0	0.00978761	0	0	0	0	0	0.146814	0	0	0.0978761	0	0	0	0	0	0	0	0	0	0	0	0	0	0	0	0.048938	0	0.00978761	0	0	0	0
492	Neisseria	0	0.0391504	0	0	0	0	0.0783009	0	0.00978761	0	0	0	0	0.176177	0	0.0195752	0	0.0195752	0.0195752	0.0195752	0.117451	0	0.0195752	0.0978761	0.0195752	0	0.048938	0.0293628	0	0.0685133	0.107664	0.0195752	0.00978761	0	0	0	0	0.048938	0	0.0391504	0	0	0.0195752	0	0	0	0.00978761	0.0978761
493	Leptotrichia	0	0	0	0	0	0	0	0	0	0	0.332779	0	0	0	0	0	0	0	0	0	0	0	0	0	0	0	0.117451	0	0	0	0	0	0	0	0	0	0	0	0	0	0	0	0.156602	0	0	0	0	0
494	Actinomyces	0	0	0.00978761	0	0	0	0	0	0	0	0.00978761	0.0293628	0	0	0.00978761	0	0	0.137027	0.0880885	0	0	0	0	0	0	0	0	0	0	0.146814	0.234903	0	0	0.215327	0.24469	0	0	0	0	0	0	0	0	0	0	0	0.303416	0
495	Fusobacterium	0	0.00978761	0	0	0	0.00978761	0.00978761	2.04561	0	0	0	0	0	0	0	0	0	0.117451	0.0195752	0.146814	0	0	0	0.812372	0	0	0	0	0.0195752	0.0195752	0	0	0	0	0	0	0.0195752	0.0685133	0	0.313203	0	0	0	0	0	0	0	0
496	Actinomyces	0	0	0.0978761	0.00978761	0	0	0	0	0	0	0	0	0.0195752	0	0	0	0.0391504	0	0.20554	0	0.00978761	0	0	0	0	0.00978761	0	0	0	0.0391504	0	0	0.00978761	0	0.234903	0	0	0	0	0	0.274053	0.00978761	0	0	0	0.0391504	0	0
498	Veillonella	0.234903	0	0	0	0.420867	0	0.048938	0	0.264265	0.69492	0	0	0.264265	0	0	0	0.303416	0	0	0	0.00978761	0	0	0	0	0	0	0	0.176177	0	0	0	0.137027	0	0	0	0	0.00978761	0	0	0	0.0195752	0	0	0	0.0293628	0	0
499	Actinomyces	0	0	0.0195752	0	0	0.00978761	0.0293628	0	0	0	0	0	0	0	0.0293628	0	0	0	0	0.00978761	0.00978761	0.0391504	0	0.0195752	0.00978761	0	0.0195752	0.0293628	0.00978761	0	0.127239	0.0978761	0.00978761	0	0	0	0	0.00978761	0	0.0195752	0	0	0.00978761	0	0.0293628	0	0.0880885	0.137027
500	Synergistaceae	0	0	0	0	0	0.0391504	0.00978761	1.2626	0	0	0	0	0	0.0195752	0	0	0	0.00978761	0	0	0	0	0	1.00812	0	0	0	0	0	0.00978761	0	0	0	0	0.0293628	0	0	0	0	0.528531	0	0	0	0	0	0	0	0
501	Veillonella	0	0	0.841734	0	0	0	0.048938	0	0	0.469805	0	0	0	0	0	0	0	0	0.274053	0	0	0	0	0	0	0.0293628	0	0	0	0	0	0	0	0	0	0	0	0.048938	0	0	0	0.0880885	0	0	0	0	0	0
502	Lachnoanaerobaculum	0	0	0.0391504	0	0	0	0	0	0	0	0	0	0	0	0	0	0	0	0.0293628	0	0	0	0	0	0	0	0	0	0	0	0	0	0	0	0	0	0	0	0	0	0	0	0	0	0	0	0.00978761	0
503	Porphyromonas_endodontalis	0	0.048938	0	0	0	0	0	0	0	0	0	0	0.00978761	0	0	1.38984	0	1.87922	0	0.00978761	0.0880885	0	0	0	0	0	0	0	0	0	0	0.626407	0	0	0	0	0	0	0	0	0	0	0	0	0.00978761	0	0	0
504	Moryella	0	0	0	0	0	0	0.0391504	0	0	0	0.146814	0	0	0	0	0	0	0.0587257	0	0	0	0	0.0391504	0	0	0	0.0587257	0	0	0	0	0	0	0.00978761	0	0	0	0	0	0	0	0	0.0685133	0	0	0	0	0
505	Prevotella	0	0	0.0587257	0	0	0	0	0	0	0	0	0	0	0.00978761	0	0	0	0	0.176177	0	0	0	0	0	0	0	0	0	0	0.20554	0	0	0	0	0	0	0	0	0	0	0	0	0	0	0	0	0	0
506	Porphyromonas	0	0	0	0	0	0	0.0783009	0	0.254478	0	0.0978761	0	0	0	0	0	0	0	0	0	0	0	0.00978761	0	0.225115	0	0.0293628	0	0	0	0	0	0	0.00978761	0	0	0	0.0587257	0	0	0	0	0.0685133	0	0	0.048938	0	0
507	Prevotella	0	0	0.048938	0	0.00978761	0	0	0	0	0	0	0	0	0	0.0587257	0	0	0	0.0783009	0	0.048938	0	0	0.508956	0	0	0	0	0	0	0.0195752	0	0	0	0	0	0	0	0.00978761	0.606832	0	0	0	0	0	0	0.00978761	0
508	Leptotrichia	0	0	0	0	0	0	0	0	0	0	0	0	0	0	0	0	0	0	0	0	0	0	0.00978761	0	0	0	0	0	0	0	0	0	0	0	0	0	0	0	0	0	0	0	0	0	0	0	0	0
509	Ruminococcus	0.00978761	0	0	0	0	0	0.156602	0	0	0	0	0	0	0	0	0	0	0	0	0	0.00978761	0	0	0	0	0	0	0	0	0.0195752	0	0	0	0	0	0.0293628	0	0	0	0	0	0	0	0.0195752	0	0.00978761	0	0
510	Corynebacterium	0	0	0	0	0	0	0	0	0	0	0	0	0	0	0	0	0	0	0	0	0	0	0	0	0	0	0	0	0	0	0	0	0	0	0	0	0	0	0	0	0	0	0	0	0	0	0	0
511	Bacteroides_massiliensis	0	0	0	0	0	0	0.460018	0	0	0	0	0	0.0195752	0	0.00978761	0	0	0	0	0	0	0	0	0	0	0	0	0	0	0	0	0	0	0	0	0	0	0.00978761	0	0	0	0	0	0	0	0	0	0
512	Gemella	0	0	0.0195752	0	0	0	0	0	0	0	0	0.0195752	0	0	0	0	0	0	0.0293628	0	0	0	0	0	0	0.00978761	0	0.24469	0	0	0	0.00978761	0	0	0.0391504	0	0	0	0	0	0	0.00978761	0	0.048938	0	0	0	0
513	Prevotellabivia	0	0	0	0	0	0	0	0	0	0	0	0	0	0	0	0	0	0	0	0	0	0	0	0	0	0	0	0	0	0	0	0	0	0	0	0	0	0	0	0	0	0	0	0	0	0	0	0
514	Streptococcus	0.107664	0	0	0	0	0	0.00978761	0	0	0	0	0	0	0	0	0	0.146814	0	0	0	0	0.0391504	0	0	0	0	0	0	0	0	0	0	0.048938	0	0	0	0	0	0	0	0	0	0	0	0	0	0	0
515	Eubacterium_saphenum	0	0	0.254478	0	0	0	0	0	0	0	0	0	0.048938	0	0	0	0	0	0.704708	0	0	0	0	0	0	0	0	0	0.0195752	0	0	0	0	0	0.822159	0	0	0	0	0	0.137027	0	0	0	0.117451	0	0	0
516	Treponema	0	0.743858	0	0	0.00978761	0	0	0	0	0.048938	0	0	0	0	0	0	0	0.479593	0	0	0.107664	0	0	0	0	0	0	0	0	0	0	0	0	0	0	0	0	0	0	0	0	0	0	0	0	0	0	0
517	Rothia	0	0	0.137027	0	0	0	0	0	0	0.048938	0	0	0	0	0	0	0	0	0.185965	0	0	0	0	0	0	0.313203	0	0	0	0	0	0	0	0	0.714495	0	0	0	0	0	0.0783009	0.636195	0	0	0	0	0	0
518	Lachnoanaerobaculum	0	0	0	0	0	0	0	0	0	0	0	0	0	0	0	0	0	0	0	0	0	0	0.0195752	0	0	0	0	0	0	0	0	0	0	0	0	0	0	0	0	0	0	0	0	0	0	0	0	0
519	Streptococcus	0	0	0	0	0	0	0	0	0	0	0	0	0	0	0.00978761	0	0	0	0	0	0	0	0	0	0	0	0	0	0	0	0.274053	0	0	0	0	0	0	0	0	0	0	0	0	0	0	0	0.225115	0
520	Catonella	0	0.117451	0.00978761	0	0	0.0195752	0	0.0587257	0	0	0	0	0.00978761	0.0195752	0	0.0293628	0	0.0880885	0	0.00978761	0	0	0	0.528531	0.00978761	0	0	0	0	0	0	0.0880885	0	0.00978761	0	0.0391504	0	0	0	0.391504	0	0	0	0	0	0	0	0
521	Lachnoanaerobaculum	0	0	0	0	0	0	0	0	0	0	0	0	0	0	0	0	0	0	0	0	0	0	0	0	0	0	0	0	0	0	0	0	0	0	0	0	0	0	0	0	0	0	0	0	0	0	0.00978761	0
522	Lactobacillus_fermentum	0	0	0	0	0	0	0	0	0	0	0	0	0	0	0	0	0.00978761	0	0	0	0	0	0	0	0	0.00978761	0	0	0	0	0	0	0	0	0	0	0	0	0	0	0	0	0	0	0	0	0	0
523	Rhizobiales	0	0	0	0	0	0	0.156602	0	0	0	0	0	0	0	0	0	0	0	0	0	0	0	0	0	0	0	0	0	0	0	0	0	0	0	0	0.107664	0	0	0	0	0	0	0	0.176177	0	0	0	0.00978761
524	Parvimonas	0	0.0195752	0	0	0	0	0	0	0	0	0.00978761	0	0	0	0	0	0	0.381717	0	0	0	0	0	0	0	0	0	0	0	0	0	0	0	2.19242	0	0	0	0	0	0	0	0	0	0.0195752	0	0	0	0
525	Helicobacter	0	0	0	0	0	0	0	0	0	0	0	0	0	0	0	0	0	0	0	0	0	0	0	0	0	0	0	0	0	0	0	0	0	0	0	0	0	0	0	0	0	0	0	0	0	0	0	0
526	Moraxella	0	0	0	0	0	0	0	0	0	0	0	0	0	0	2.19242	0	0	0	0.00978761	0	0	0	0	0	0	0	0	0	0	0	0.606832	0	0	0	0	0	0	0	0	0	0	0	0	0	0.0391504	0	0.0783009	0
527	Actinomyces	0.0195752	0	0	0	0.00978761	0.293628	0.0880885	0	0	0	0	0	0.0391504	0	0.00978761	0	0.0685133	0	0	0	0.0195752	0.557894	0	0.0783009	0	0	0	0	0	0	0	0	0.0587257	0	0	0	0.00978761	0.381717	0	0.048938	0	0.0293628	0	0	0	0	0	0
528	Selenomonas	0	0	0.127239	0	0	0	0	0	0	0	0	0	0.0880885	0.107664	0.0391504	0.00978761	0	0.0293628	0.156602	0.048938	0	0.00978761	0.0293628	0	0.00978761	0	0	0.0293628	0.176177	0	0	0.0293628	0	0	0	0.0293628	0	0.00978761	0	0	0	0	0	0	0	0.00978761	0	0
529	Pasteurellaceae	0	0.0978761	0	0.00978761	0	0	0.00978761	0	0	0	0	0	0	0	0	0	0	0.00978761	0	0.215327	0	0	0	0	0	0	0	0	0	0	0	0	0	0	0	0.0587257	0	0	0	0	0	0	0	0	0	0	0	0
530	Synergistaceae	0	0.303416	0.00978761	0	0	0	0	0	0	0	0.00978761	0	0.048938	0.0195752	0.048938	0.0880885	0	0.24469	0	0	0	0	0.195752	0.0391504	0	0.00978761	0	0	0.225115	0	0.146814	0.0783009	0	0.0195752	0	0	0	0	0	0	0	0	0	0	0	0	0.0293628	0.0391504
531	Achromobacter	0	0.048938	0	0	0	0	0	0	0	0	0	3.37673	0	0	0.0685133	0	0	0	0	0	0	0	0	0	0	0	0	0	0	0	0	0	0	0	0	0	0	0	0	0	0.0195752	0	0.0293628	0.332779	0.0391504	0	0	0
532	Acinetobacter	0	0	0	0	0	0	0.0391504	0.048938	0	0	0	0	0	0	0.00978761	0	0	0	0	0	0	0	0	0	0	0	0.00978761	0	0	0	0	0	0	0.00978761	0.00978761	0	0	0.0293628	0	0	0	0	0	3.59205	0.0978761	0	0	0
533	Prevotellaceae	0	0	0	2.51542	0	0	0	0	0	0	0	0	0	0.998336	0	0	0	0	0	0.117451	0	0	0	0	0	0	0.00978761	0	0	0.176177	0	0	0	0	0.0293628	0	0	0	0	0	0	0	0	0	0	0	0	0
534	Lactobacillus_mucosae	0	0	0	0	0	0	0	0	0	0	0	0	0	0	0	0	0	0	0	0	0	0	0	0	0	0	0	0	0	0	0	0	0	0.00978761	0	0	0	0	0	0	0	0.00978761	0	0	0	0	0	0
535	Escherichia_or_Shigella	0	0	0	0	0	0	0.117451	0	0	0	0	0	0	0	0	0	0	0	0	0	0	0	0	0	0	0.557894	0	0	0	0	0	0	0	0	0	0	0	0	0	0	0	0.381717	0	0	0	0	0	0
536	Capnocytophaga	0	0	0	0	0.00978761	0	0.0195752	0	0	0	0.0293628	0	0	0	0	0.00978761	0	0	0	0	0.00978761	0	0.0685133	0	0	0	0.0685133	0	0	0	0	0.0195752	0	0	0	0	0	0.00978761	0	0	0	0.00978761	0.00978761	0	0	0	0	0
537	Lachnoanaerobaculum	0.0391504	0	0	0	0.0195752	0	0.048938	0	0	0.185965	0	0	0.00978761	0	0	0	0.0195752	0	0	0.00978761	0.0685133	0	0	0	0.00978761	0.146814	0	0	0	0	0	0	0.048938	0	0	0	0	0.0293628	0	0	0	0.0978761	0	0	0	0	0	0
538	Prevotella	0	0.0293628	0	0.146814	0	0	0	0.166389	0.0293628	0.137027	0	0	0.00978761	0.0195752	0.0391504	0	0	0.0293628	0.00978761	0.577469	0.00978761	0	0.0587257	0.24469	0.00978761	0.00978761	0	0.0195752	0.0195752	0.048938	0.0195752	0	0	0	0.0195752	0.254478	0	0	0	0.117451	0.0685133	0	0	0	0	0	0.0195752	0
539	Parvimonas	0	0	0	0	0	0	0	0	0	0	0	0	0	0	0	0	0	0	0	0	0	0	0	0.597044	0	0	0	0	0	0	0	0	0	0	0	0	0	0	0.00978761	0.557894	0	0	0	0	0	0	0	0
540	Lactobacillaceae	0	0	0	0	0.0293628	0	0.00978761	0	0	0.00978761	0	0	0	0	0	0	0	0	0	0	0.0293628	0.00978761	0	0	0	0	0	0	0	0	0	0	0	0	0	0	0	0	0	0	0	0	0	0	0	0	0	0
541	Cyanobacteria	0	0	0	0	0	0	0	0	0	0	0	0	0	0	0	0	0	0	0	0	0	0	0	0	0	0	0	0	0	0	0	0	0	0	0	0	0	0	0	0	0	0	0	0.156602	0	0	0	0.00978761
542	Veillonellaceae	0	0	0	0	0.0293628	0	0.303416	0	0	0	0	0	0	0	0	0	0	0	0	0	0	0	3.50396	0	0	0	0	0	0	0	0	0	0	0	0	0	0	0	0	0	0.176177	0	0	0	0	0	0	0
543	Flavobacteriaceae	0	0	0.00978761	0	0	0.460018	0.048938	0.0783009	0.0195752	0	0	0	0	0	0	0	0	0	0	0	0	1.28218	0.00978761	0.00978761	0	0	0	0	0.0391504	0	0	0.117451	0	0	0	0	0	0.048938	0	0.0195752	0	0	0	0	0	0	0	0
544	Gemella	0	0	0	0	0	0	0	0	0	0	0	0	0	0	0	0	0	0	0	0	0	0	0	0.41108	0	0	0	0	0	0	0	0	0	0	0	0	0	0	0	0.185965	0	0	0	0	0	0	0	0
545	Lachnospiracea_incertae_sedis	0	0.00978761	0	0	0	0	0.0195752	0	0	0	0	0	0	0	0	0	0	0	0	0	0	0	0	0	0	0	0	0	0.0195752	0	0	0	0	0	0	0	0	0	0	0	0	0	0	0.440442	0	0	0	0
546	Prevotella	0.0685133	0	0.00978761	0	0	0.0391504	0	0	0.0587257	0.0783009	0.00978761	0	0.0293628	0.0587257	0.00978761	0.0195752	0.0195752	0.0293628	0.048938	0	0.0293628	0.0391504	0.0587257	0	0.00978761	0	0.00978761	0.0783009	0.00978761	0.0587257	0.0293628	0.0293628	0.0783009	0	0	0	0	0.00978761	0	0	0	0.0195752	0.0587257	0	0	0	0.0391504	0
547	Streptococcus	0.0391504	0.0195752	0	0.225115	0	0	0	0	0	0	0	0	0.0195752	0	0	0	0	0.048938	0	0.0293628	0	0	0	0	0	0	0	0	0	0	0.0195752	0	0	0.185965	0	0	0	0	0	0	0	0	0.00978761	0	0.0391504	0	0.0293628	0
548	Lachnospiraceae	0	0	0	0	0	0	0	0	0	0	0.00978761	0	0	0	0	0.00978761	0	0.0783009	0	0	0.00978761	0	0	0	0.00978761	0	0	0	0	0	0.00978761	0	0	0.479593	0	0	0	0	0	0	0	0	0	0	0	0	0	0.00978761
549	Fusobacterium	0	0.00978761	0.0391504	0.117451	0	0.0195752	0.048938	0.264265	0.107664	0.00978761	0	0	0	0	0	0	0	0.0587257	0.156602	0.841734	0	0	0	0.215327	0.0195752	0.0195752	0	0	0	0	0	0	0	0	0	0.127239	0	0.0293628	0	0.0293628	0	0	0	0	0	0	0	0
550	Pasteurellaceae	0	0	0	0	0	0	0	0	0	0	0	0	0	0.792796	0	0	0	0	0	0	0	0	0	0.00978761	0	0	0	0.00978761	0	0.293628	0	0	0	0	0	0	0	0	0	0	0	0	0	0	0.0293628	0	0	0
551	Blautia	0	0.00978761	0	0	0.00978761	0	0	0	0	0	0	0	0	0	0	0	0	0	0	0.00978761	0	0	0	0	0	0	0	0.00978761	0.048938	0	0	0	0	0	0	0	0	0	0	0	0.0978761	0.00978761	0.0293628	0	0	0	0.0293628	0
552	Streptococcus	0.0195752	0	0.0391504	0.0978761	0.0391504	0.00978761	0	0	0.048938	0	0.0293628	0	0.00978761	0	0	0	0.225115	0	0.0293628	0	0.0391504	0.048938	0	0.107664	0.0195752	0.00978761	0.0685133	0	0	0.00978761	0.048938	0.048938	0.0783009	0	0.0195752	0	0	0	0.234903	0.283841	0	0	0.0783009	0	0.0195752	0.0391504	0.0391504	0.00978761
554	Moraxella	0	0	0	0	0	0	0	0	0	0	0	0	0	0	0	0	0	0	0	0	0	0	0	0	0	0	0	0	0	0	0	0	0	0	0	0	0	0	0	0	0	0	0	0	0	0	0	0
555	Streptococcus	0	0	0	0	0	0	0	0	0.00978761	0	0.0391504	0	0	0	0	0	0	0	0	0	0	0	0	0	0.0293628	0	0.0195752	0	0	0	0	0	0	0	0	0	0	0	0.0195752	0	0	0	0.0587257	0	0	0	0	0
556	Actinomyces	0.00978761	0	0.0195752	0.0391504	0.117451	0	0	0.0293628	0	0	0	0	0	0	0	0	0.0195752	0	0	0.0293628	0.137027	0	0	0.0195752	0	0	0	0	0	0	0	0.00978761	0	0	0.0195752	0	0.117451	0.00978761	0	0	0	0	0	0	0	0	0	0.00978761
557	Eubacterium	0	0.0587257	0	0.0293628	0	0	0	0	0	0	0	0	0	0	0	0.0195752	0	0.048938	0.0293628	0.225115	0.00978761	0	0	0.048938	0.0685133	0	0	0	0	0.0783009	0.0391504	0.117451	0	0.352354	0	0	0	0	0	0.0195752	0	0.00978761	0.00978761	0	0	0.0195752	0.107664	0.107664
558	Streptococcus	0.0391504	0	0	0	0	0	0	0.0195752	0	0	0	0	0	0	0	0	0.880885	0	0	0	0	0	0	0	0	0	0	0	0	0	0	0	2.19242	0	0.0195752	0	0	0	0	0	0	0	0	0	0	0	0	0
559	Lactobacillus	0	0	0	0	0	0	0	0	0	0.0293628	0	0	0	0	0	0	0	0	0	0	0.0293628	0	0	0.0293628	0	0.156602	0	0	0	0.0978761	0	0	0	0	0	0	0	0	0	0.00978761	0	0.0293628	0	0	0	0.0391504	0	0
560	Streptococcus	0	0	0	0.0195752	0	0	0	0	0.0293628	0	0.137027	0	0	0	0	0	0	0.0195752	0	0	0	0	0	0	0.117451	0	0.0391504	0	0	0	0.0391504	0	0	0.048938	0	0	0	0	0.048938	0	0	0	0.185965	0	0	0	0	0
561	Abiotrophia	0	0.0195752	0	0	0	0	0	0	0	0	0	0	0	0.0195752	0	0	0	0	0	0	0	0	0	0	0	0	0	0.0195752	0	0.293628	0	0	0	0	0	0	0	0	0	0	0	0	0	0	0	0.430655	0	0
562	Kocuria_palustris	0	0	0	0	0	0	0.00978761	0	0	0	0	0.254478	0	0	0.0195752	0	0	0	0	0	0	0	0	0	0	0	0	0	0	0	0	0	0	0.0293628	0	0.0391504	0	0	0	0	0.0978761	0	0	0.0587257	0	0	0	0.00978761
563	Janthinobacterium	0	0.0293628	0	0.00978761	0	0	0.0293628	0	0	0	0	0.352354	0	0	0.0880885	0	0	0	0	0	0	0	0	0	0	0	0	0	0	0	0	0	0	0.0293628	0.048938	0.185965	0	0.137027	0.0391504	0	0.234903	0	0.00978761	0.0685133	0	0.048938	0.00978761	0.0195752
564	Leptotrichia	0	0	0	0.00978761	0	0	0	0	0.0195752	0	0	0	0	0	0	0	0	0.0195752	0	0.0880885	0	0	0	0	0.00978761	0	0	0	0	0.0685133	0.391504	0	0	0	0	0	0	0	0	0.0195752	0	0	0	0	0	0	0.0195752	0
565	Gemella	0	0	0	0	0	0.0391504	0.0195752	0.274053	0	0	0	0	0	0	0	0	0	0	0	0	0	0	0	0.645982	0	0	0	0	0	0	0	0	0	0	0	0	0	0	0	0.499168	0	0	0	0	0	0	0	0
566	Actinomycetales	0	0	0	0	0	0	0	0.00978761	0	0	0	0.352354	0	0	0.00978761	0	0	0	0	0	0	0	0	0	0	0	0	0	0	0	0	0	0	0	0.0195752	0.137027	0.0293628	0.0293628	0	0	0.430655	0	0	0.185965	0.00978761	0.00978761	0	0.00978761
567	Peptoniphilus_harei	0	0	0	0	0	0	0	0	0	0	0	0	0	0	0	0	0	0	0	0	0	0	0	0	0	0	0	0	0.00978761	0	0	0	0	0	0	0.0587257	0	0	0	0	0	0	0	0.342566	0	0	0	0
568	Prevotella	0	0	0	0	0	0	0	0	0	0	0	0	0	0	0	0	0	0	0	0	0	0	0	0	0	0	0	0	0	0	0	0	0	0	0	0	0	0	0	0	0	0	0	0	0	0	0	0
569	Streptococcus	0.00978761	0	0	0	0	0	0	0	0.107664	0	0	0	0	0	0	0.0685133	0	0	0	0	0	0	0	0	0.0783009	0	0	0	0	0	0.0293628	0.156602	0	0	0	0	0	0.00978761	0.274053	0	0	0	0	0	0	0	0.0685133	0.137027
570	Brevundimonas	0	0	0	0	0	0	0	0	0	0	0	1.77156	0	0	0.0195752	0	0	0	0	0	0	0	0	0.00978761	0	0	0	0	0	0	0	0	0	0	0.0195752	0	0	0	0.00978761	0	0.048938	0	0	0.342566	0	0	0	0.00978761
571	Anaerococcus	0	0	0	0	0	0	0	0	0	0	0	0	0	0	0.342566	0	0	0	0	0	0	0	0	0	0	0	0	0	0	0	0	0	0	0	0	0.0195752	0	0.0195752	0.0195752	0	0.048938	0	0	0.117451	0.127239	0	0	0
572	Pseudomonas	0	0	0	0	0	0	0	0	0	0	0	0	0	0	0	0	0	0	0	0	0	0	0	0	0	0	0	0	0	0	0	0	0	0	0.00978761	0	0	0	0	0	0.0293628	0	0	0	0	0.0195752	0	0
573	Streptococcus	0	0	0	0.998336	0	0	0.0293628	0	0	0	0	0	0	0.0293628	0	0	0	0	0	0.0391504	0	0	0	0	0	0	0	0	0	0.0195752	0	0	0	0.0195752	0	0	0	0	0	0	0	0	0	0	0	0	0.0195752	0
574	Moraxella_nonliquefaciens_or_lacunata	0	0	0.00978761	0.048938	0	0	0	0.215327	0	0	0	0	0	0	0	0	0	0	0	0	0	0	0.0293628	0	0	0	0.322991	0.773221	0	0	0	0	0	0	0.0587257	0.137027	0	0	0.0195752	0	0	0	0.48938	0	0	0	0	0
575	Streptococcus	0	0	0.0880885	0	0	0	0	0	0	0	0	0	0	0	0	0	0	0	0.567681	0	0	0	0	0	0	0	0	0	0	0	0	0	0	0	1.43878	0	0	0	0.0391504	0	0.313203	0	0	0	0	0	0.00978761	0
576	Fusobacterium	0	0	0	0.0391504	0	0	0	0	0.0783009	0	0.0685133	0	0.00978761	0.0978761	0	0.00978761	0.00978761	0.00978761	0.00978761	0	0.0195752	0	0.0293628	0	0.0978761	0	0.0978761	0.0587257	0	0.0293628	0.0195752	0.0293628	0	0.00978761	0	0	0	0	0	0	0	0	0.048938	0	0	0.00978761	0.048938	0
577	Enhydrobacter	0	0	0	0	0	0	0	0	0	0	0	0	0	0	0	0	0	0	0	0	0	0	0	0	0	0	0	0	0	0	0	0	0	0	0	0.0587257	0	0	0	0	0.0783009	0.00978761	0	0	0	0	0	0
578	Porphyromonas	0	0.0391504	0	0	0	0	0	0	0	0	0.00978761	0	0	0	0	0	0	0.528531	0	0	0	0	0	0	0	0	0	0	0	0	0	0	0	0	0	0	0	0	0	0	0	0	0	0	0	0	0	0
579	Porphyromonadaceae	0	0	0.0391504	0	0	0	0.00978761	0	0	0	0.00978761	0	0	0.00978761	0	0	0	0.0293628	0.00978761	0	0.00978761	0.0195752	1.00812	0.0293628	0.0293628	0	0	0	0	0.048938	0.00978761	0	0	0	0	0	0.00978761	0	0	0.225115	0	0	0	0	0.0195752	0	0	0
580	Oribacterium	0.0195752	0	0.0293628	0.00978761	0.0685133	0	0	0	0.00978761	0.0293628	0	0	0.0880885	0	0	0	0.0293628	0	0	0.0783009	0.215327	0.00978761	0	0	0	0.0195752	0	0.00978761	0.137027	0	0	0	0	0	0	0.00978761	0	0	0	0	0	0.0195752	0	0	0	0	0	0
581	Prevotella	0	0	0	0	0	0	0	0	0	0	0	0	0	0	0	0.00978761	0	0	0	0	0	0	0	0	0	0	0	0	0	0	0	0	0	0	0.00978761	0	0	0	0	0	0	0	0	0	0	0	0	0
582	Streptococcus	0	0	0	0	0	0	0	0	0	0	0	0	0	0	0	0	0	0	0	0	0	0	0	0	0	0	0	0	0	0	0	0	0	0	0	0	0	0	0	0.00978761	0	0	0	0	0	0	0	0
583	Leptotrichia	0	0.127239	0	0	0	0	0	0	0	0	0	0	0	0	0	0	0	0.117451	0	0	0	0	0	0.0587257	0	0	0	0	0	0	0	0	0	0	0	0	0	0	0	0.0783009	0	0	0	0	0	0	0	0
584	Oribacterium	0.0978761	0	0	0.0293628	0.00978761	0	0.0195752	0	0.00978761	0.0293628	0.0195752	0	0.00978761	0	0	0.0195752	0.166389	0	0	0.0587257	0.00978761	0.0880885	0	0	0.0587257	0.0195752	0	0.195752	0	0	0	0.0391504	0	0	0	0	0	0.00978761	0	0	0	0.00978761	0.0195752	0	0	0	0	0.00978761
585	Streptococcus	0	0	0.0783009	0.0293628	0.0978761	0	0	0	0	0	0.0293628	0	0	0	0	0.0293628	0	0	0.127239	0.00978761	0.0391504	0	0	0	0.00978761	0	0.0783009	0.048938	0	0	0	0.00978761	0	0.00978761	0.137027	0	0.107664	0	0.0195752	0	0.0195752	0	0.117451	0.0391504	0	0	0	0
586	Prevotella	0	0.0685133	0.0195752	0.0391504	0	0	0	0	0	0.195752	0	0	0.0195752	0	0	1.22345	0.048938	0.0978761	0	0	0.0293628	0	0	0	0.0391504	0.0195752	0.0195752	0	0.0391504	0.00978761	0.0587257	0.195752	0.0195752	0	0	0	0	0	0	0	0	0.00978761	0.048938	0	0	0	0.0587257	0
587	Fusobacterium	0	0	0	0	0	0	0	0	0	0	0	0	0	0	0	0	0	0.00978761	0	0	0	0	0	0	0	0	0	0	0	0	0	0	0	0	0	0	0	0	0	0	0	0	0	0	0	0	0	0
588	Treponema	0	0	0	0	0	0	0	0	0	0	0	0	0	0	0	0	0	0	0	0	0	0	0	0	0	0	0	0	0	0	0	0	0	0	0	0	0	0	0	0	0	0	0	0	0	0	0	0
589	Fusobacterium	0	0	0.0587257	0	0	0	0	0.146814	0.0195752	0	0	0	0.156602	0	0	0	0	0	0.156602	0	0	0	0	0.0880885	0.0587257	0	0.0293628	0.0978761	2.0554	0.00978761	0	0	0	0	0	0	0	0	0	0.0685133	0	0.00978761	0.0293628	0	0	0.0293628	0.00978761	0
590	Aeromonas	0	0	0	0	0	0	0	0	0	0	0	0	0	0.00978761	0	0	0	0	0	0	0	0	0	0	0	0	0	0	0	0	0	0	0	0	0	0	0	0	0	0	0	0	0	0	0	0.0293628	0	0
591	Streptococcus	0.0195752	0	0	0	0.00978761	0	0.0293628	0	0	0.0195752	0	0	0	0	0	0	0.0293628	0	0.00978761	0	0.00978761	0	0	0	0.0391504	0.0293628	0	0	0	0.0195752	0	0	0.0195752	0	0.0195752	0	0	0	0.00978761	0	0	0	0	0	0	0	0	0
592	Streptococcus	0	0	0	0	0.0195752	0	0	0	0	0.00978761	0	0	0	0	0	0.352354	0.0293628	0	0	0	0.00978761	0	0	0	0	0.00978761	0.00978761	0	0	0	0.440442	0.0978761	0.0195752	0	0	0	0	0	0	0	0	0	0	0	0	0	0.48938	0.274053
593	Actinomyces	0	0	0.00978761	0	0	0	0	0	0	0	0	0	0.0391504	0	0	0	0.0293628	0	0.00978761	0	0	0	0	0	0	0	0	0	0	0	0	0	0	0	0.0195752	0	0	0	0	0	0	0	0	0	0	0	0	0
594	Pasteurellaceae	0	0.234903	0	0	0	0	0	0	0	0	0.724283	0	0	0.508956	0	0	0	0.0195752	0	0	0	0	0	0	0	0	0.675345	0	0	0	0	0	0	0	0	0	0	0	0	0	0	0	0.548106	0.0391504	0	0	0	0
595	Lactobacillus	0	0	0	0	0	0	0	0	0	0	0	0	0	0	0	0	0	0	0	0	0	0	0	0	0	0	0	0	0	0	0	0	0	0	0	0	0	0	0	0	0	0	0	0	0	0	0	0
597	Lachnoanaerobaculum	0	0.00978761	0	0.00978761	0	0	0.0783009	0	0	0	0.0978761	0	0	0	0	0	0	0.127239	0	0.0195752	0	0	0.0880885	0	0.0391504	0	0.0685133	0	0	0	0	0	0	0.00978761	0	0	0	0	0	0	0	0	0.0293628	0	0	0	0	0
598	Leptotrichia	0.0978761	0	0.127239	0.0195752	0	0	0.0195752	0	0	0.0783009	0	0	0.00978761	0.00978761	0	0	0.0293628	0.00978761	0.0293628	0	0.0195752	0	0.0587257	0	0	0.0587257	0.00978761	0	0.0880885	0.0195752	0	0	0.0195752	0	0	0	0	0	0	0	0	0.0195752	0.0293628	0	0	0	0	0
599	Salinicola	0	0	0	0	0	0.0587257	0	0	0	0	0	0	0	0	0	0	0	0	0	0	0	0	0	0	0	0	0	0	0	0	0	0	0	0	0	0.0587257	0.254478	0	0	0	0.0783009	0	0	0	0	0	0	0
600	Finegoldia	0	0	0	0.00978761	0	0	0	0.156602	0	0	0	0	0	0	0.0783009	0	0	0	0	0	0	0	0	0	0	0.00978761	0	0	0	0	0	0	0	0	0	0	0	0	0	0	0	0	0	0	0	0	0	0.0195752
601	Kingella	0	0.0195752	0.0391504	0	0	0.0195752	0.0195752	0	0	0.00978761	0	0	0.0391504	0	0	0	0.048938	0	0.00978761	0.0391504	0.0293628	0.0587257	0.00978761	0.0880885	0	0.127239	0	0.0685133	0.0391504	0	0	0.293628	0.264265	0	0	0.0195752	0	0.0685133	0	0	0	0.185965	0	0	0	0.0195752	0	0.0587257
602	Pseudomonas	0	0	0	0	0	0	0.0195752	0.048938	0	0	0	0	0	0	0.00978761	0	0	0	0	0	0	0	0	0.0783009	0	0	0	0	0	0	0	0	0	0.0293628	0.0293628	0.0783009	0	0.156602	0.0195752	0	0.0783009	0	0	0.146814	0.0293628	0	0	0
603	Bulleidia	0	0	0	0	0.00978761	0.0293628	0	0	0	0	0	0	0.0195752	0	0	0	0.00978761	0.0391504	0	0	0	0.0783009	0	0.156602	0	0	0	0	0.00978761	0.0685133	0	0	0	0.0587257	0	0	0.0685133	0.0293628	0	0.127239	0	0	0	0	0.00978761	0.0293628	0	0
604	Dorea	0	0	0	0	0	0	0	0	0	0.0195752	0	0	0	0	0.0195752	0	0	0	0	0	0	0	0.00978761	0	0	0	0	0	0.0195752	0	0.00978761	0	0	0	0	0.0195752	0	0	0	0	0	0.00978761	0	0	0.00978761	0	0	0.00978761
605	Prevotella	0	0	0	0	0	0	0	0	0	0	0	0	0	0	0	0	0	0	0	0	0	0	0	0	0	0	0	0	0	0	0.0195752	0	0	0	0	0	0	0	0	0	0	0	0	0	0	0	0	0
606	Streptococcus	0	0	0	0	0	0	0	0	0	0	0	0	0	0	0	0	0.0391504	0	0.0391504	0	0	0	0	0	0	0	0	0	0	0	0	0.0293628	0.0195752	0	0.0391504	0	0	0	0	0	0	0	0	0	0	0	0	0.0685133
607	Campylobacter	0	0	0.93961	0	0	0	0	0	0	0	0	0	0	0	0	0	0	0	1.77156	0	0	0	0	0	0.313203	0	0	0	0	0	0	0	0	0	0	0	0	0	0	0	0	0	0	0	0	0	0	0
608	Actinomyces	0	0	0	0	0	0	0	0	0	0	0	0	0	0	0	0	0	0	0	0	0	0	0	0	0	0	0	0	0	0	0	0	0	0	0	0	0	0	0	0	0	0	0	0	0	0.0195752	0	0
609	Streptococcus_infantis	0	0	0	0	0	0	0.0293628	0	0.0391504	0	0	0	0	0	0	0	0	0	0	0	0	0	0	0	0.107664	0	0	0	0	0	0	0	0	0	0	0	0	0	0.0783009	0	0	0	0	0	0	0	0	0
610	Enterococcus	0	0	0	0	0	0	0	0	0	0	0	0	0	0	0	0	0	0	0	0	0	0	0	0	0	0	0	0	0	0	0	0	0	0	0	0	0	0	0	0	0	0	0	0	0	0	0	0
611	Filifactor_alocis	0	0	0	0	0	0	0	0	0	0	0	0	0	0	0	0	0	0	0.048938	0	0.0391504	0	0	0	0	0	0	0	0	0	0.362142	0	0	0	0	0	0	0	0	0	0	0	0	0	0	0	0	0
612	Ruminococcaceae	0	0.00978761	0.0195752	0	0	0	0.0391504	0	0.00978761	0.0783009	0	0	0	0	0.0391504	0	0.00978761	0.107664	0.0195752	0	0	0	0.156602	0	0.0391504	0	0	0	0	0.0391504	0.00978761	0	0.0587257	0.0293628	0	0	0	0.0293628	0	0	0	0	0	0	0	0	0	0
613	Streptococcus	0	0.00978761	0	0	0	0	0.0195752	0	0	0	0	0	0	0	0	0	0	0.048938	0	0	0	0	0	0	0	0	0	0	0	0	0	0	0	0.20554	0	0	0	0	0	0	0	0	0.00978761	0.0195752	0	0	0	0
614	Roseburia	0	0	0	0	0	0	0	0	0	0	0	0	0	0	0	0	0	0	0	0	0	0	0	0	0	0	0	0	0	0	0	0	0	0	0	0	0	0	0	0	0	0	0	0.420867	0	0	0.0293628	0
615	Selenomonas	0.146814	0	0.00978761	0	0.0391504	0	0.00978761	0	0.0195752	0.048938	0.0195752	0	0.195752	0.0195752	0.166389	0	0.0195752	0	0	0.00978761	0.00978761	0	0.00978761	0	0	0	0.0195752	0	0.283841	0	0	0	0.0880885	0	0	0.0195752	0	0.00978761	0	0	0	0	0	0	0	0.0293628	0	0
616	Streptococcus	0	0	0	0	0	0	0	0	0	0	0	0	0.00978761	0	0	0	0.00978761	0	0	0	0	0	0	0	0	0	0	0	0	0	0.00978761	0	0.0293628	0	0	0	0	0.0195752	0	0	0	0	0	0	0	0	0.0685133	0
617	Prevotella	0	0	0	0	0	0	0	0	0	0	0	0	0	0	0	0	0	0.0587257	0	0	0	0	0	0	0	0	0	0.0293628	0	0	0	0	0	0	0	0	0	0	0	0	0	0	0	0	0	0.048938	0	0
618	Veillonella	0	0.176177	0	0	0	0	0.0587257	0	0.00978761	0.185965	0	0	0.0195752	0	0	0	0	0.0293628	0	0	0.00978761	0	0	0	0.00978761	0	0	0	0.048938	0	0	0	0	0.146814	0	0	0	0	0	0	0	0.0195752	0	0	0	0	0	0
619	Actinomyces	0.00978761	0	0	0	0	0	0	0	0	0	0	0	0	0	0	0	0.0391504	0.0195752	0	0	0	0	0	0	0	0	0	0.00978761	0	0.176177	0	0	0.048938	0.137027	0	0	0	0	0	0	0	0	0	0	0	0.0587257	0	0
620	Streptococcus	0	0	0	0	0	0	0.0978761	0	0.0195752	0	0.0685133	0	0	0	0	0	0	0	0	0	0	0	0.0685133	0	0.00978761	0.0195752	0.00978761	0	0	0	0	0	0	0	0	0	0	0	0.0195752	0	0	0.0195752	0.0293628	0	0	0	0	0
621	Actinomyces	0.00978761	0	0.156602	0	0	0	0	0	0	0	0	0	0.0293628	0.00978761	0	0	0	0.0195752	0.0293628	0.00978761	0.0587257	0	0	0	0.00978761	0.0195752	0	0.00978761	0.0391504	0.264265	0.0195752	0	0.0195752	0.0880885	0.0880885	0	0.0880885	0.00978761	0.00978761	0.156602	0.0195752	0.048938	0	0	0.0783009	0.440442	0.00978761	0
622	Streptococcus	0.24469	0	0	0.137027	0	0	0	0	0	0	0	0	0	0	0	0	0.381717	0	0	0.0880885	0	0	0	0	0	0	0	0	0	0	0	0	0.303416	0	0	0.00978761	0	0	0	0	0	0	0	0	0	0	0	0
623	Prevotella	0	0	0.90046	0	0	0	0.0293628	0	0.0587257	0	0	0	0	0	0	0	0	0	1.38984	0	0	0	0	0	0.166389	0	0	0	0	0	0.0293628	0	0	0	0.0293628	0	0	0	0	0	0	0	0	0	0	0	0	0
624	Pasteurellaceae	0	0	0	0	0	0	0	0	0	0	0	0	0	0	0	0.225115	0	0	0	0	0	0	0	0	0	0	0	0	0	0	0	1.32133	0	0	0	0	0	0	0	0	0	0	0	0	0	0	0	1.43878
625	Neisseria	0	0	0	0	0	0	0	0	0	0	0	0	0	0	0	0	0	0	0	0	0	0	0	0	0	0	0	0	0	0	0	0	0	0	0	0	0	0	0	0	0	0.0195752	0	0	0	0	0	0
626	Oribacterium	0	0	0	0	0	0	0	0	0	0	0	0.00978761	0.0587257	0	0	0.127239	0	0.00978761	0	0.0391504	0	0	0.117451	0.048938	0.048938	0.0587257	0	0.0195752	0.0293628	0.0195752	0.146814	0.0587257	0	0.0391504	0	0	0	0	0	0.048938	0	0	0	0	0.00978761	0	0	0.048938
627	Lachnospiracea_incertae_sedis	0	0	0	0	0	0	0.0685133	0	0	0	0	0	0	0	0	0	0	0	0	0	0	0	0	0	0	0	0	0	0	0	0	0	0	0	0	0	0	0.00978761	0	0	0	0	0	0	0	0	0	0
628	Streptococcus	0	0	0	0	0	0	0	0	0	0	0	0	0	0	0	0	0	0	0	0	0	0	0	0	0	0	0	0	0	0.0293628	0	0	0	0	0	0	0	0	0	0	0	0	0	0	0	0	0	0
629	Capnocytophaga	0	0	0	0	0	0	0	0	0	0	0	0	0	0	0	0	0.0195752	0	0	0	0	0	0	0	0.0391504	0	0	0.107664	0	0	0	0	0.0195752	0	0	0	0	0	0	0	0	0	0	0	0	0	0	0
630	Leptotrichia	0.00978761	0	0	0	0	0	0	0	0.00978761	0	0	0	0	0	0	0	0	0.00978761	0	0	0	0	0	0	0	0	0	0	0	0	0.0293628	0.0195752	0.0195752	0.0195752	0	0	0	0	0	0	0	0	0	0	0	0	0.048938	0
631	Moraxella	0	0	0	0	0	0	0	0	0	0	0	0	0	0	0	0	0	0	0	0	0	0	0	0	0	0	0	0	0	0	0	0	0	0	0	0	0	0	0	0	0	0	0	0	0	0	0	0
632	Capnocytophaga	0	0.00978761	0	0	0	0	0	0	0	0	0	0	0	0.0391504	0.00978761	0	0.048938	0.0391504	0	0	0	0	0	0.0685133	0.0195752	0	0	0	0	0.0293628	0	0	0.0391504	0	0	0	0	0	0	0.048938	0	0	0	0	0	0	0.0293628	0
633	Abiotrophia	0	0	0	0	0	0	0	0	0.0293628	0	0	0	0	0.00978761	0	0	0	0	0	0	0	0	0	0	0.00978761	0	0	0	0	0.0587257	0.0880885	0	0	0	0	0	0	0	0.048938	0	0	0.00978761	0	0	0	0.0293628	0.048938	0
634	Streptococcus	0	0	0.00978761	0.0195752	0	0	0.0293628	0	0	0.00978761	0.00978761	0	0	0.00978761	0	0	0	0.00978761	0	0	0	0.0195752	0	0.0293628	0.0587257	0	0.0293628	0	0.00978761	0	0.00978761	0.0293628	0.00978761	0	0	0	0	0	0.0293628	0	0	0	0.0195752	0	0	0	0	0.0195752
635	Bacteroidetes	0	0.0195752	0	0	0	0.00978761	0	0	0.107664	0	0	0	0	0	0	0	0	0.0391504	0	0	0.0685133	0	0	0.0587257	0.0978761	0	0	0	0	0	0.0587257	0	0	0	0	0	0	0	0	0.0195752	0	0	0	0	0	0	0.0195752	0
636	Anoxybacillus	0	0	0	0	0	0	0	0	0	0	0.00978761	0	0	0	0	0	0	0	0	0	0	0	0	0	0	0	0	0	0	0	0	0	0	0	0	0	0	0	0	0	0	0	0	0.0391504	0.0391504	0	0	0
637	Mycoplasma	0	0.0195752	0	0	0	0	0.264265	0.127239	0	0	0	0	0	0	0	0	0	0.0293628	0	0	0	0	1.22345	0.0293628	0	0	0	0	0	0	0	0	0	0	0	0	0	0	0	0.0293628	0.195752	0	0	0	0	0.00978761	0	0
638	Actinobacillus	0	0	0	0	0	0	0	0	0	0	0	0	0	0	0	0	0	0	0	0	0	0	0	0	0	0	0	0.24469	0	0.00978761	0	0	0	0	0	0	0	0	0	0	0	0	0	0	0	0	0	0
639	Olsenella_uli	0	0	0.0195752	0.0293628	0	0	0.00978761	0	0	0.00978761	0	0	0	0	0	0.0293628	0.0195752	0	0.0293628	0.0880885	0.00978761	0	0	0.0195752	0	0	0	0	0	0	0	0.0293628	0	0.0391504	0.215327	0.0587257	0	0.0195752	0	0.0783009	0.0293628	0	0.00978761	0	0.0293628	0	0.0293628	0.0293628
640	Actinomyces	0	0	0	0	0	0	0	0	0	0	0	0	0	0	0	0	0	0	0	0	0.00978761	0	0	0	0	0	0	0	0	0	0	0	0	0	0	0	0.0783009	0	0	0	0	0	0	0.0293628	0	0	0	0
641	Lachnoanaerobaculum	0	0	0.0293628	0	0	0	0	0	0	0	0	0	0	0	0	0	0	0	0.00978761	0	0	0	0	0	0	0	0	0	0	0	0	0	0	0	0	0	0	0	0	0	0	0	0	0	0	0	0	0
642	Ruminococcaceae	0	0	0	0	0	0	0.117451	0	0	0	0	0	0	0	0	0	0	0	0	0	0	0	0	0	0	0	0	0	0	0	0	0	0	0	0	0	0	0	0	0	0.0783009	0	0	0	0	0	0	0
643	Streptococcus	0	0	0	0.606832	0	0	0	0	0	0	0	0	0	0	0	0.00978761	0	0	0	0.215327	0	0	0	0	0	0	0	0.00978761	0	0	0	0.00978761	0	0	0	0.0391504	0	0	0	0	0	0	0	0	0	0	0	0.048938
644	Actinomyces	0	0.00978761	0.00978761	0	0	0	0	0	0	0	0	0	0	0	0	0	0	0	0.0293628	0	0	0	0	0	0	0	0	0	0	0	0.0195752	0	0	0.0195752	0.166389	0	0	0	0	0	0	0	0	0	0	0	0	0
645	Enterococcus	0	0	0	0	0	0	0	0	0	0	0	0	0	0	0	0	0	0	0	0	0	0	0	0	0	0	0	0	0	0	0	0	0	0	0	0	0	0	0	0	0	0	0	0	0	0	0	0
646	Anaerococcus	0	0	0	0	0	0	0	0	0	0	0	0	0	0	0	0	0	0	0	0	0	0	0	0	0	0	0	0	0	0	0	0	0	0.00978761	0	0.048938	0	0	0	0	0	0	0	0	0	0.00978761	0	0
647	Campylobacter	0	1.36048	0	0	0	0	0	0	0	0	0	0.0293628	0.156602	0.0195752	0.0195752	0	0	0.469805	0	0	0	0	0	0	0	0	0	0	0.557894	0	0.0978761	0	0	0	0	0	0	0	0	0	0	0	0.0195752	0	0.00978761	0.0293628	0.00978761	0
648	Streptococcus	0	0	0.0978761	0	0	0	0	0	0	0	0	0	0	0	0	0	0	0	0.166389	0	0	0	0	0	0	0	0	0	0	0	0	0	0	0	0.714495	0	0	0	0	0	0.0195752	0	0	0	0	0	0	0
649	Actinomyces	0	0	0.00978761	0.127239	0	0	0	0	0	0	0	0	0	0.0587257	0	0	0	0	0	0.0880885	0	0	0.0195752	0	0	0	0	0.0978761	0	0	0	0	0	0	0	0.0783009	0	0	0	0	0	0	0	0.00978761	0	0	0	0
650	Actinomyces	0	0.00978761	0	0.0195752	0	0	0	0	0	0	0.00978761	0	0.00978761	0	0	0	0	0.0195752	0	0.048938	0.00978761	0	0	0	0.00978761	0	0.0195752	0.0293628	0	0	0	0.0195752	0	0.0195752	0	0	0	0	0.00978761	0	0	0.0195752	0.0587257	0.00978761	0	0	0.0195752	0.00978761
651	Fusobacterium	0	0.0391504	0	0	0	0	0.0685133	0.352354	0	0	0	0	0	0	0	0	0	0.0391504	0	0	0	0	0	0.342566	0	0	0	0	0	0	0	0	0	0	0	0	0	0.00978761	0	0.107664	0	0	0	0	0	0	0	0
652	Capnocytophaga	0	0.156602	0	0	0	0	0	0	0	0	0	0	0	0.107664	0	0	0	1.50729	0.0195752	0	0.00978761	0	0.0195752	0	0	0	0.0391504	0	0	0	0	0	0	0.0293628	0	0	0	0	0	0	0	0	0.00978761	0	0	0	0	0
653	Prevotellaceae	0	0	0	0	0	0	0	0	0	0	0	0	0	0	0	0	0	0.00978761	0	0	0	0	0	0	0	0	0	0	0	0	0	0	0	0	0	0	0	0	0	0	0	0	0	0	0	0	0	0
654	Actinomyces	0	0	0	0	0	0	0	0.107664	0	0	0	0	0	0	0	0	0	0	0	0	0	0	0	0.0293628	0	0	0	0	0	0	0	0	0	0	0	0	0	0	0	0.00978761	0	0	0	0	0	0	0	0
655	Capnocytophaga_gingivalis	0	0.00978761	0	0	0	0	0.0293628	0	0	0	0.107664	0	0	0.0195752	0	0	0.0293628	0.00978761	0	0	0	0	0.00978761	0.00978761	0.048938	0	0.0685133	0.0587257	0	0	0	0	0.00978761	0	0	0.107664	0	0	0	0	0	0	0.00978761	0	0	0	0	0
656	Hallella	0	0.137027	0.048938	0	0	0	0	0.107664	0	0	0	0.00978761	0	0.0391504	0.107664	0	0	0.0587257	0	0	0	0	0	0.0685133	0	0	0	0	0	0.322991	0.0293628	0	0	0	0	0	0	0	0	0.0391504	0	0	0	0	0.00978761	0	0	0
657	GN02	0	0	0	0	0	0	0	0	0	0	0	0	0	0	0	0	0	0	0	0	0	0	0	0	0.0391504	0	0	0	0	0.00978761	0	0	0	0	0	0	0	0	0	0.0391504	0	0	0	0	0	0	0	0
659	Prevotellaceae	0	0	0	0	0	0	0	0	0	0	0	0	0	1.13536	0.0195752	0	0	0	0	0	0	0	0	0	0	0	0	0	0	0.137027	0.00978761	0	0	0	0	0	0	0	0	0	0	0	0	0	0	0	0.00978761	0
660	Streptococcus	0	0	0	0	0	0	0	0	0	0.0391504	0	0	0.665557	0	0	0	0	0	0	0	0	0	0	0	0.00978761	0.117451	0	0	0.0293628	0	0	0	0	0	0	0	0	0.00978761	0.0293628	0	0	0.127239	0	0	0.322991	0.0391504	0	0
661	Clostridium_XI	0.0195752	0	0	0	0	0	0.156602	0	0	0	0.00978761	0	0	0	0	0	0	0	0	0	0	0	0	0	0	0	0	0	0	0	0	0	0	0	0	0	0	0.0880885	0	0	0	0	0	0	0	0	0	0
663	Corynebacterium	0	0	0	0	0	0	0.00978761	0	0	0	0	0.225115	0	0	0	0	0	0	0	0	0	0	0	0	0	0	0	0	0	0	0	0	0	0	0	0	0	0	0.00978761	0	0	0	0	0.0783009	0.0587257	0	0	0.00978761
664	Fusobacterium	0	0	0	0	0	0	0.0195752	0	0	0	0	0	0	0	0	0	0	0	0	0	0	0	0.00978761	0	0	0	0	0	0	0	0	0	0	0	0	0	0	0	0	0	0	0	0	0	0	0	0	0
665	Actinobacillus	0	0	0	0	0	0	0	0	0	0	0	0	0	0	0	0.0391504	0	0	0	0	0	0	0	0	0	0	0.048938	0	0	0	0	0.117451	0	0	0	0	0	0	0	0	0	0	0.0880885	0	0	0	0	1.3409
666	Peptostreptococcaceae_incertae_sedis	0	0	0	0	0	0	0	0	0	0	0.00978761	0	0	0	0	0	0	0.342566	0	0	0	0	0	0	0	0	0	0	0	0	0	0	0	0.391504	0	0	0	0	0	0	0	0	0	0	0	0	0	0
667	Alloscardovia	0	0	0.0391504	0.0293628	0	0	0.0195752	0	0	0.048938	0	0	0	0	0	0	0	0	0.0195752	0.0293628	0	0	0	0	0	0.0293628	0	0	0	0	0	0	0	0	0.557894	0.254478	0	0	0	0.00978761	0.0293628	0.0293628	0	0	0.0685133	0	0	0
668	Gemella	0	0	0	0	0	0	0	0	0	0	0	0	0	0	0	0	0	0	0	0	0	0	0	0	0	0	0	0	0	0	0	0	0	0	0	0	0	0	0	0	0	0	0	0	0	0	0	0
669	Actinomyces	0	0	0.00978761	0	0	0	0	0.166389	0	0	0	0	0.00978761	0	0	0	0	0	0.00978761	0	0	0	0	0.166389	0	0	0	0	0	0.00978761	0.00978761	0	0	0	0.00978761	0.00978761	0	0	0.00978761	0.24469	0.048938	0	0	0	0	0	0.00978761	0.0587257
670	Streptococcus	0	0	0	0	0	0	0.0391504	0.910248	0	0	0	0	0	0	0	0	0	0	0	0	0	0	0	0.20554	0	0	0	0	0	0	0	0	0	0	0	0	0	0.0195752	0	0.264265	0	0	0	0	0	0	0	0
671	Corynebacterium	0	0	0	0	0	0	0	0	0	0	0	0	0	0	0	0	0	0	0	0	0	0	0	0	0	0	0	0	0	0	0	0	0	0	0	0	0.0685133	0	0	0	0	0	0	0	0	0	0	0
672	Streptococcus	0	0	0	0	0	0	0	0	0	0	0.00978761	0	0.0195752	0	0	0	0	0	0	0	0	0	0	0	0	0	0.00978761	0.146814	0	0.0293628	0	0	0	0	0	0	0	0	0	0	0	0	0	0.283841	0	0	0	0
675	Lachnospiraceae	0	0	0	0	0	0	0	0	0	0	0	0	0	0	0	0.048938	0	0.048938	0	0	0	0	0	0	0	0	0	0	0	0	0	0.0195752	0	0.283841	0	0	0	0.0391504	0	0	0	0	0	0	0	0	0.00978761	0.0195752
676	Paracoccus	0	0	0	0	0	0	0	0	0	0	0	0	0	0	0	0	0	0	0	0	0	0	0	0	0	0	0	0.00978761	0	0	0	0	0	0	0	0	0	0.0391504	0	0	0	0	0	0	0	0	0	0
677	Prevotella	0	0.0880885	0.0587257	0	0	0	0	0	0	0.0587257	0.00978761	0.00978761	0	0	0	0.606832	0	0.0685133	0.0293628	0.0293628	0	0.00978761	0	0.0293628	0	0	0.0391504	0	0	0.0195752	0	0.831947	0	0	0	0	0	0	0	0	0	0	0.0783009	0	0	0	0	0.00978761
678	Catonella	0	0	0	0	0	0	0	0	0.0587257	0	0.00978761	0	0.0293628	0	0	0	0	0	0	0	0	0	0	0	0.048938	0	0	0.176177	0.0293628	0	0	0.00978761	0	0	0	0	0	0	0	0	0	0	0.00978761	0	0	0	0	0.00978761
679	Oribacterium	0	0	0	0.0685133	0.00978761	0	0.0391504	0	0	0	0	0	0	0	0	0.00978761	0	0	0	0.0195752	0	0	0.332779	0	0	0	0	0	0	0	0.0195752	0.00978761	0	0.00978761	0	0	0	0	0	0	0	0	0	0	0	0	0	0
680	Actinomyces	0.0195752	0	0.0195752	0.0195752	0	0	0	0	0.00978761	0	0	0	0.0391504	0	0	0	0.117451	0	0	0	0	0	0	0	0.00978761	0	0	0	0	0	0	0	0.127239	0	0.00978761	0	0	0	0.225115	0	0.176177	0	0	0	0.0293628	0.00978761	0	0
681	Howardella	0	0	0	0	0	0	0.00978761	0	0	0	0	0	0	0	0	0	0	0	0.0293628	0	0	0	0	0	0.137027	0	0	0.0880885	0	0.00978761	0	0	0	0	0	0	0	0.00978761	0	0	0	0	0	0	0	0	0.0195752	0
682	Granulicatella	0	0	0	0	0	0	0	0	0	0	0	0	0	0.048938	0	0	0	0	0	0	0	0	0	0	0	0	0	0	0.00978761	0.322991	0	0	0	0	0	0	0	0	0	0	0	0	0	0	0.00978761	0.107664	0	0
683	Selenomonas	0.107664	0	0	0	0	0	0	0	0	0	0	0	0.137027	0	0	0	0.0293628	0	0	0.00978761	0	0	0	0	0	0.0293628	0	0	0.254478	0	0	0	0.048938	0	0	0.0195752	0	0	0	0	0	0	0	0.00978761	0.0195752	0.048938	0	0
684	Prevotella	0	0	0	0	0	0	0	0	0	0	0	0	0	0	0	0	0	0	0	0	0	0	0	0	0	0	0	0	0	0	0	0	0	0	0	0	0	0.00978761	0	0	0	0	0	0.00978761	0	0	0	0
685	Leptotrichia	0.381717	0	0.0293628	0	0	0	0	0	0	0	0	0	0	0	0	0	0.0783009	0	0.00978761	0	0	0	0	0	0	0	0	0	0.00978761	0	0	0	0.107664	0	0	0	0	0	0	0	0.00978761	0	0	0	0	0	0	0
686	Beijerinckiaceae	0	0	0	0	0	0	0	0	0	0	0	0	0	0	0	0	0	0	0	0	0	0	0	0	0	0	0	0	0	0	0	0	0	0	0	0	0	0	0	0	0	0	0.0391504	0.156602	0	0	0	0
687	Clostridium_XI	0	0	0	0.00978761	0	0	0.0685133	0.00978761	0	0	0	0.00978761	0	0	0	0	0	0	0	0	0.00978761	0	0	0	0	0	0	0	0	0	0	0	0	0	0	0	0	0.00978761	0	0	0.303416	0	0	0	0	0	0	0
688	Alphaproteobacteria	0	0	0	0	0	0	0	0	0	0	0	0	0	0	0	0	0	0	0	0	0	0	0	0	0	0	0	0	0	0	0	0	0	0	0	0	0	0	0	0	0	0	0	0	0	0	0	0
690	Streptococcus	0.234903	0	0	0	0	0	0	0	0	0	0	0	0	0	0	0.127239	0.0391504	0	0	0	0	0	0	0	0	0	0	0	0	0	0	0.00978761	0.0195752	0	0	0	0	0	0	0	0	0	0	0	0	0	0	0.0391504
691	Actinomyces	0	0	0	0	0	0	0	0	0	0	0	0	0	0	0	0	0	0	0.00978761	0	0	0	0	0	0	0	0	0	0	0	0	0	0	0	0.0195752	0	0	0	0	0	0	0	0	0	0	0	0	0
692	Streptococcus	0	0	0	0.00978761	0	0.00978761	0	0	0	0	0	0	0	0	0	0	0	0	0	0.00978761	0	0	0	0	0	0	0	0	0	0	0	0	0	0	0	0.0195752	0	0	0	0	0	0	0	0	0	0	0	0
693	Streptococcus	0	0	0	0	0	0	0	0	0	0	0	0	0	0	0	0	0	0	0	0	0	0	0	0	0	0	0	0	0	0	0	0	0	0	0	0	0	0	0	0	0	0	0	0	0	0	0	0
694	Massilia	0	0	0	0	0	0	0	0	0	0	0	0	0	0	0	0	0	0	0	0	0	0	0	0	0	0	0	0	0	0	0	0	0	0	0.00978761	0.0195752	0	0	0	0	0	0	0	0	0	0	0	0
695	Streptococcus	0	0	0	0	0	0	0	0	0	0	0	0	0	0.0783009	0	0	0	0	0	0	0	0	0	0	0	0	0	0.00978761	0	0.283841	0.0195752	0	0	0	0	0	0	0	0	0	0	0	0	0	0	0.048938	0	0
696	Bacteroides	0	0	0	0	0	0	0	0	0	0	0	0	0	0	0	0	0	0	0	0	0	0	0	0	0	0	0	0	0	0	0	0	0	0	0	0	0	0.00978761	0	0	0	0	0.00978761	0.0587257	0.0293628	0	0	0
697	Actinomyces	0	0	0	0	0	0	0	0	0	0	0	0	0	0	0	0	0	0	0	0	0	0	0	0	0	0	0	0	0	0.0293628	0	0	0	0	0	0	0	0	0	0	2.11412	0	0.0391504	0	0	0.0880885	0	0
698	Prevotella	0	0	0	0	0	0	0	0	0	0	0	0	0	0.00978761	0.117451	0.00978761	0	0.00978761	0.0391504	0	0	0	0	0	0	0	0	0.0195752	0	0.00978761	0.0880885	0	0.0195752	0	0	0	0	0.00978761	0	0	0	0	0	0	0	0	0.127239	0
699	Prevotella	0	0	0	0	0	0	0	0	0	0	0.0293628	0	0.127239	0.0293628	0	0	0	0	0	0	0	0	0.0685133	0	0	0	0.0195752	0	0.293628	0	0.0195752	0	0	0	0	0	0	0	0	0	0	0	0.00978761	0	0	0.00978761	0	0
701	Prevotella	0	0.234903	0	0	0	0	0	0	0	0	0	0	0	0	0	0	0	0.479593	0	0	0.107664	0	0.00978761	0	0	0	0	0	0	0	0	0	0.00978761	0	0	0	0	0.0195752	0	0	0	0	0	0	0	0.00978761	0	0
702	Sebaldella	0	0	0	0	0	0	0	0	0	0	0	0	0	0	0	0	0.00978761	0.0195752	0	0	0	0	0	0.0587257	0	0	0	0	0	0.048938	0.00978761	0	0	0	0	0	0	0	0	0.107664	0	0	0	0	0	0.0880885	0	0
703	Blautia	0	0	0	0	0	0	0	0	0	0	0	0.00978761	0	0	0	0	0	0	0	0	0	0	0	0	0	0	0	0	0	0	0	0	0	0	0	0	0	0.048938	0	0	0	0.0293628	0	0	0.0195752	0	0.0391504	0
704	Leptotrichia	0	0	0	0	0	0	0	0	0	0	0	0	0	0	0	0	0	0	0	0	0	0	0	0	0	0	0	0	0	0.0293628	0	0	0	0	0	0	0	0	0	0	0	0	0	0	0	0	0	0
705	Streptococcus	0	0	0.00978761	0	0	0	0	0	0	0	0	0	0	0	0	0	0	0	0.00978761	0	0	0.00978761	0	0	0	0.00978761	0	0	0	0	0	0	0	0	0.0293628	0	0	0	0	0	0	0	0	0	0	0	0	0
706	Dialister	0	0	0.146814	0	0	0	0.0391504	0	0	0.048938	0	0	0	0	0	0	0.00978761	0	0.0293628	0	0	0.156602	0	0.0293628	0.00978761	0	0	0	0	0	0	0	0	0	0	0	0	0.00978761	0	0.0293628	0	0	0	0	0	0	0	0
709	Prevotella_shahii	0	0	0	0	0	0	0	0	0	0	0.548106	0	0	0	0	0	0	0	0	0	0	0	0	0	0	0	0.528531	0	0	0	0	0	0	0	0	0	0	0	0	0	0	0	0.156602	0	0	0	0	0
772	Pasteurellaceae	0	0	0	0	0	0	0	0	0	0	0.0391504	0	0	0	0	0	0	0	0	0	0	0	0	0	0	0	0.606832	0	0	0	0	0	0	0	0	0	0	0	0	0	0	0	1.19409	0	0.0391504	0	0	0
835	Lachnoanaerobaculum	0	0	0	0	0	0	0	0	0	0	0	0	0.00978761	0.00978761	0	0	0	0	0	0	0	0	0	0	0	0	0	0	0	0	0	0	0	0	0	0	0	0	0	0	0	0	0	0	0	0	0	0
[truncated: 71 more columns]
