# Supplementary material
Source: HighWire-hosted journal article supplement (https://gut.bmj.com/content/67/2/216)
Supplement: inline-supplementary-material-6 [file inline-supplementary-material-6.xlsx]

## Sheet: Supplementary Table 5
Supplementary Table 5: Relative percent phylum abundance across all 119 samples
Phylum	P1_OAX	P2_OAX	P3_OAX	P4_OAX	P5_OAX	P6_OAX	P7_OAX	P8_OAX	P9_OAX	P10_OAX	P11_OAX	P12_OAX	P13_OAX	P14_OAX	P15_OAX	P16_OAX	P1_SAX	P2_SAX	P3_SAX	P4_SAX	P5_SAX	P6_SAX	P7_SAX	P8_SAX	P9_SAX	P10_SAX	P11_SAX	P12_SAX	P13_SAX	P14_SAX	P15_SAX	P16_SAX	P1_DAX	P2_DAX	P3_DAX	P4_DAX	P5_DAX	P6_DAX	P7_DAX	P8_DAX	P9_DAX	P10_DAX	P11_DAX	P12_DAX	P13_DAX	P14_DAX	P15_DAX	P16_DAX	P17_OAH
Actinobacteria	17.6862	2.73074	20.7106	14.0942	18.7335	4.69805	8.82842	3.42566	15.807	17.7254	3.50396	42.4684	14.7401	5.95087	3.67035	4.64911	16.6879	3.84653	9.01439	6.39131	18.1658	7.86924	0.929823	3.2397	2.76989	19.0565	4.5023	7.0275	5.72575	12.7435	4.57081	4.41421	8.77949	14.5346	29.9794	17.882	17.7841	25.115	14.515	2.64265	48.5759	21.2587	5.01126	29.9697	24.0286	14.0844	6.76324	4.88402	33.4443
Bacteroidetes	9.954	34.5209	17.0011	16.6389	8.36841	3.46481	26.221	29.9207	26.3972	21.6306	9.03396	9.73867	18.939	25.2912	28.7854	33.2974	17.3632	41.196	28.2373	26.3482	18.1952	29.3139	34.0707	23.0792	23.7252	2.27073	9.28844	28.9909	45.3362	15.5917	26.4461	27.6304	29.1573	0.665557	2.03582	24.4494	0.685133	12.3618	0.371929	12.7435	6.42067	5.12871	7.57561	4.12058	2.212	5.82363	16.3257	0.313203	6.93941
Cyanobacteria/Chloroplast	0	0	0	0	0	0	0	0	0	0	0	0	0	0	0	0	0	0	0	0	0	0	0	0	0	0	0	0	0	0	0	0	0	0.0293628	0	0.0293628	0	0.0195752	0.00978761	0	0.0783009	0	0	0.176177	0	0	0	0.00978761	0
Firmicutes	26.4559	13.3307	37.5746	47.0099	57.6197	82.9891	41.2156	36.5665	42.028	39.1015	22.5604	35.4018	49.633	34.8341	26.681	35.3528	40.6969	16.6389	35.8618	44.24	52.1386	49.4666	20.877	47.9789	50.9151	41.0394	37.5453	30.5765	18.0484	49.0457	33.4149	41.1373	34.3937	74.5522	65.5183	45.6983	80.2682	46.0115	84.3007	65.714	28.7854	42.1944	50.9739	48.938	70.8917	75.1297	61.9947	55.0553	47.0295
Fusobacteria	37.8585	4.71763	16.6781	8.42713	8.65225	1.03749	6.31301	9.05354	5.51042	8.94587	20.9944	0.195752	11.7353	10.4042	1.77156	8.30968	16.59	22.1298	17.5981	15.621	6.53812	6.7926	29.2845	12.0094	12.3422	7.46795	13.086	19.262	22.2277	12.9784	13.7712	9.62122	7.14495	8.83821	0.352354	1.70304	0.048938	7.69306	0.048938	14.3291	1.38984	3.62142	12.303	0.86131	1.31154	3.37673	6.50876	2.66223	8.39777
GN02	0	0	0	0	0	0	0	0	0	0	0	0	0	0	0	0	0	0	0	0	0	0	0	0	0.0391504	0	0	0	0	0.00978761	0	0	0	0	0	0	0	0	0	0.0391504	0	0	0	0	0	0	0	0	0
Proteobacteria	8.03563	29.7445	5.54957	13.3405	6.54791	7.742	16.5704	7.32113	9.67995	10.3161	43.0361	11.9898	3.96398	22.9422	25.8295	9.32759	8.55437	6.45003	7.81051	3.58226	4.39464	6.5577	12.5184	7.62455	9.65058	28.9028	35.1179	14.1431	6.636	8.67182	13.4286	15.161	20.4855	0.675345	1.98688	8.39777	1.1843	8.38798	0.753646	2.03582	13.3209	27.7381	23.9209	15.9244	1.50729	1.46814	8.26074	35.9303	3.91504
Spirochaetes	0.00978761	11.5004	0.968973	0.0195752	0.0293628	0.0293628	0.283841	5.51042	0.508956	2.01625	0.597044	0.146814	0.00978761	0.479593	9.46462	7.71264	0.107664	5.77469	0.724283	0.420867	0.440442	0	0.851522	2.75032	0.440442	0.00978761	0.293628	0	0	0.910248	7.49731	1.8205	0.0195752	0.0195752	0.048938	0.127239	0.0293628	0.24469	0	0.812372	1.23324	0.00978761	0.0783009	0	0	0.048938	0.0978761	0	0.00978761
SR1	0	0.342566	0	0.0880885	0	0	0	0	0	0	0.234903	0.00978761	0	0	0	0	0	2.42733	0	0.0195752	0	0	0	0	0	0	0.166389	0	0	0	0	0	0	0.636195	0	0	0	0	0	0	0	0	0.117451	0	0	0	0	0	0
Synergistetes	0	1.51708	1.15494	0.0293628	0	0.0391504	0.0685133	2.31966	0.0195752	0.107664	0.0195752	0.0195752	0.93961	0.0685133	0.499168	0.0880885	0	1.07664	0.401292	1.25281	0.0978761	0	0.195752	1.99667	0.0293628	1.25281	0	0	1.4975	0.00978761	0.371929	0.0783009	0.0195752	0.048938	0.0293628	1.20388	0	0.00978761	0	0.959186	0	0.048938	0.00978761	0.00978761	0.00978761	0.0391504	0.0391504	0.0391504	0
Tenericutes	0	1.59538	0.362142	0.352354	0.048938	0	0.499168	5.88235	0.048938	0.156602	0.0195752	0.0293628	0.0391504	0.0293628	3.29842	1.2626	0	0.460018	0.352354	2.12391	0.0293628	0	1.27239	1.32133	0.0880885	0	0	0	0.528531	0.0391504	0.499168	0.137027	0	0	0.048938	0.508956	0	0.156602	0	0.724283	0.195752	0	0.00978761	0	0.0391504	0.0293628	0.00978761	1.106	0.264265
[truncated: 70 more columns]
