# Supplementary material
Source: HighWire-hosted journal article supplement (https://gut.bmj.com/content/67/2/216)
Supplement: inline-supplementary-material-7 [file inline-supplementary-material-7.pdf]

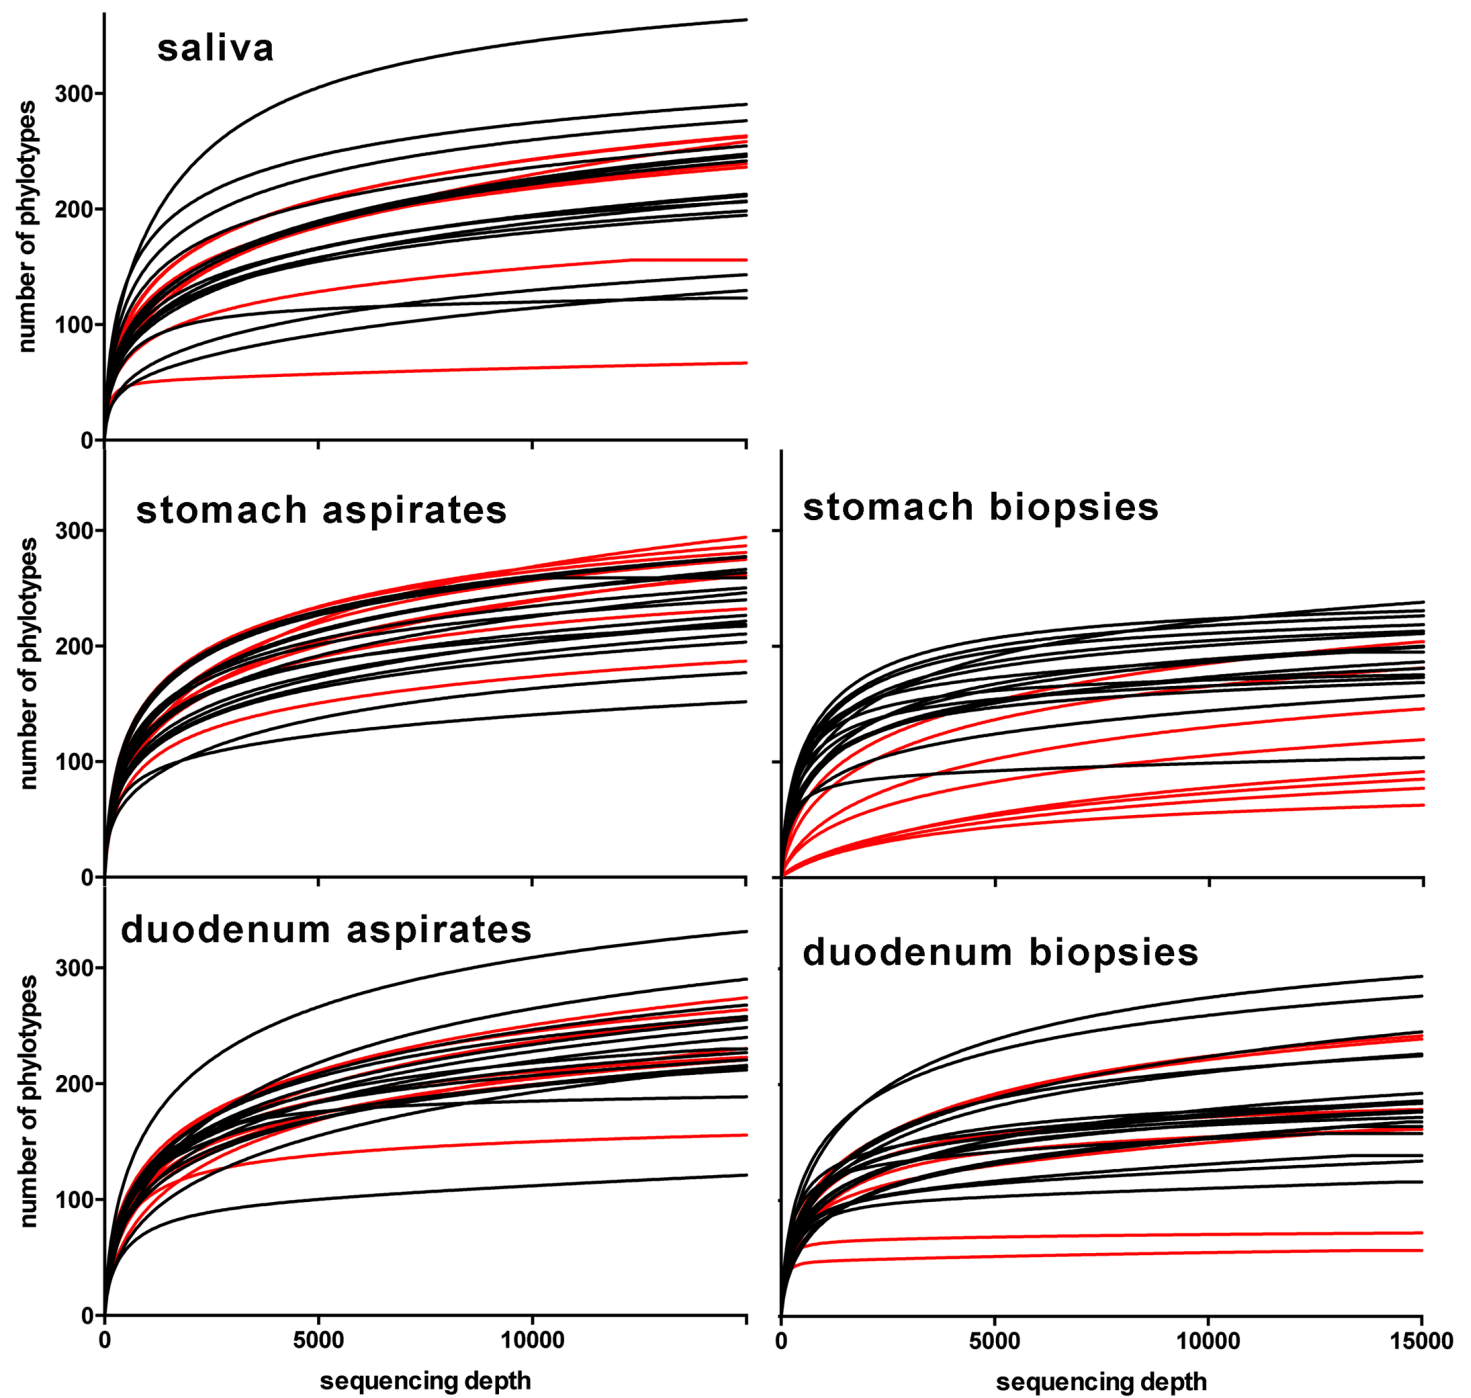

**Supplementary Figure 1:** Rarefaction curves portraying the number of resolved phylotypes against sequencing depth for each sample. Samples from individuals infected with *H. pylori* are shown in red, those of non-infected individuals in black.



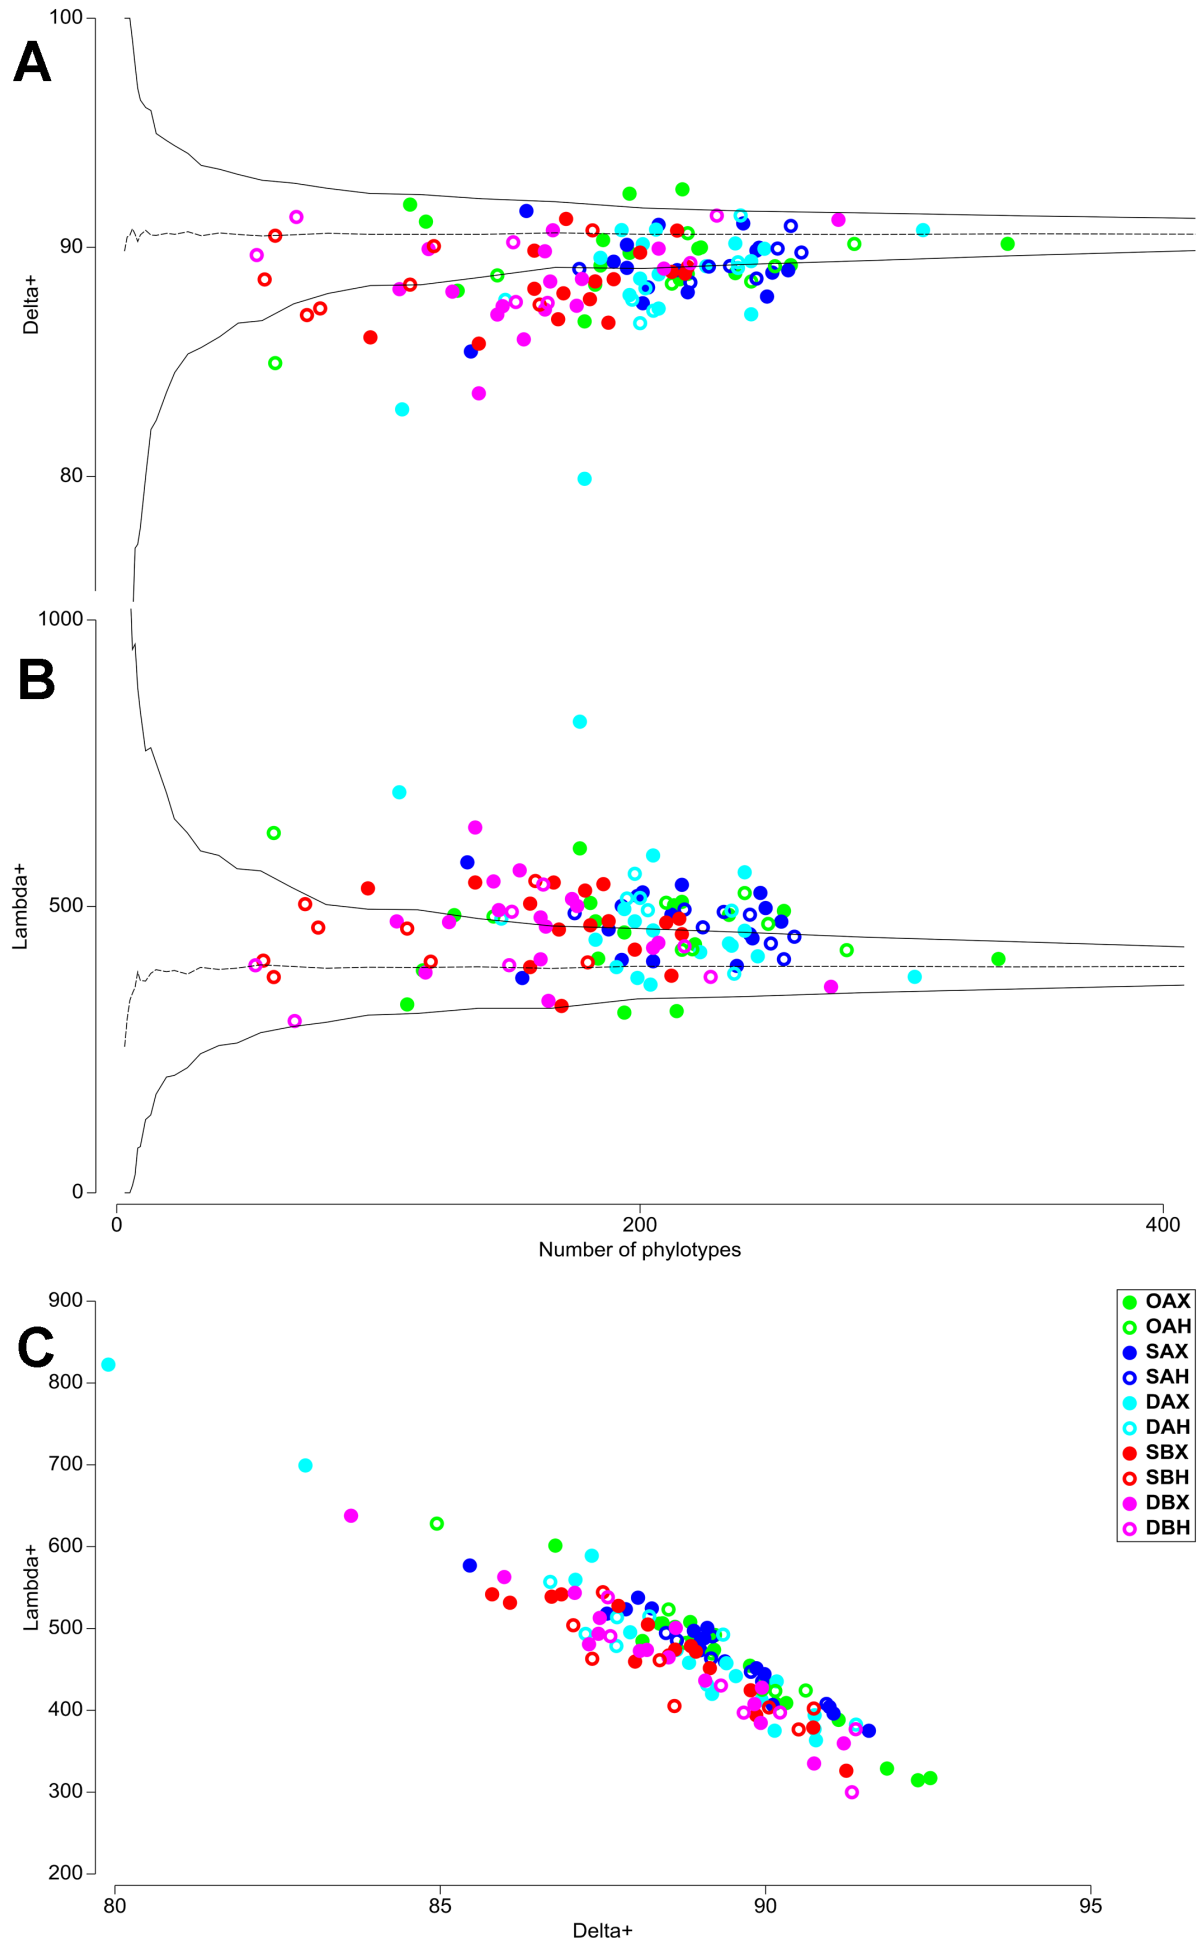

**Supplementary Figure 3:** Taxonomic distinctness and evenness of microbial communities along the gastrointestinal tract. Funnel plots chart the (A) average taxonomic distinctness (delta+) and (B) variation in taxonomic distinctness (lambda+) against the number of phylotypes within each sample. The funnel indicates the limits within 95% of the simulated TD values and the middle line represents the mean expected TD. (C) Charts average taxonomic distinctness (lambda+) against variation in taxonomic distinctness (delta+).
