# Supplementary material
Source: HighWire-hosted journal article supplement (https://gut.bmj.com/content/67/2/216)
Supplement: inline-supplementary-material-11 [file inline-supplementary-material-11.xlsx]

## Sheet: Supplementary Table 9
Supplementary Table 9: Genera differently distributed between sampled sites
Mean abundance of genera at different sampled sites
Genus	OAX		SAX		DAX		OAH		SAH		DAH		SBX		DBX		DBH
	mean SEM		mean SEM		mean SEM		mean SEM		mean SEM		mean SEM		mean SEM		mean SEM		mean SEM
Acinetobacter	0.00856416	0.00463191	0.000611726	0.000611726	0.337673	0.295535	0.0024469	0.0024469	0	0	0.00856416	0.00389643	0.0245088	0.0112864	0.0324438	0.0200922	0.0819568	0.0803374
Actinobaculum	0.01713	0.009044	0.02203	0.008549	0.06485	0.02812	0.02936	0.01558	0.03425	0.01155	0.09788	0.05325	0.001838	0.001333	0.004288	0.002186	0.0028	0.0028
Actinomyces	7.01955	1.6013	5.26329	1.17993	7.75301	1.49973	9.56127	2.64852	5.56915	1.16869	7.15597	1.84438	2.92181	0.695688	3.83822	0.730009	4.40932	1.17809
Alloprevotella	4.79287	1.60663	5.20028	1.31857	1.46386	0.547035	1.5073	0.6326	1.8486	0.4177	0.3988	0.1946	0.9196	0.3256	0.9401	0.6889	1.0224	0.4072
Anaerococcus	0.0220221	0.0213783	0	0	0.0727953	0.0344306	0	0	0	0	0.0122345	0.00842571	0.0336704	0.0161442	0.242684	0.0834978	0.453622	0.281444
Atopobium	0.5096	0.1371	0.386	0.08364	0.7341	0.2498	0.5909	0.1945	0.5995	0.1966	0.7488	0.2324	0.2705	0.0834	0.2547	0.09355	0.4083	0.2005
Bacteroides	0.1224	0.09162	0.03059	0.0109	0.1407	0.09609	0.5848	0.557	0.03916	0.01433	0.04408	0.01334	0.6612	0.1783	1.034	0.5607	2.49	1.578
Brevundimonas	0.129686	0.109864	0.00122345	0.00122345	0.155378	0.0700052	0	0	0	0	0.0220221	0.012511	0.321452	0.198561	0.209858	0.0681979	0.00279646	0.00180511
Campylobacter	2.75215	0.93114	2.40164	0.445296	0.534036	0.188366	1.33723	0.455135	1.66389	0.56079	0.477146	0.219113	0.378943	0.0872737	0.133141	0.0427283	0.395703	0.248692
Capnocytophaga	0.08871	0.0434	0.2245	0.09786	0.03549	0.01384	0.2863	0.1858	0.1334	0.04424	0.0208	0.01069	0.1047	0.0342	0.186	0.1449	0.6145	0.3008
Corynebacterium	0.899848	0.806342	0.0911471	0.0373847	0.767104	0.358209	0.269159	0.251101	0.048938	0.0274353	0.401292	0.270699	0.519749	0.135786	0.775887	0.214645	0.589124	0.28502
Dermacoccus	0.0770774	0.0669151	0.00122345	0.00122345	0.13458	0.0589394	0	0	0	0	0.0159049	0.00885871	0.0539718	0.0234119	0.0490344	0.0157438	0.0238144	0.0171082
Enhydrobacter	0.10277	0.0656816	0.0103993	0.00801493	0.674122	0.347985	0.0110111	0.00856416	0.00489381	0.00261585	0.351131	0.205452	1.80387	0.601922	2.06208	0.562673	1.86959	1.084
Enterococcus	0.00245	0.00245	0	0	0.00245	0.001415	0	0	0	0	0	0	0.4066	0.1493	0.6003	0.373	0.0042	0.0042
Eubacterium	0.4074	0.2441	0.9604	0.2512	1.904	0.9385	0.3732	0.1772	0.8576	0.2314	0.6142	0.1567	1.151	0.3702	0.7485	0.2533	0.5791	0.2609
Fusobacterium	4.09183	0.850145	8.23994	1.13998	2.07803	0.594106	6.85744	1.9859	6.083	1.54692	2.99256	0.805825	4.07298	1.40207	3.75994	2.1713	2.52033	0.908096
Gemella	1.81682	0.376568	3.91749	0.952141	4.31817	1.02431	3.64588	1.02913	4.03984	0.855572	5.36116	1.47263	5.77386	1.55458	6.81785	1.84382	3.21103	0.998235
Granulicatella	2.344	0.4184	2.596	2.596	3.58	0.7498	3.977	1.164	2.112	0.4074	4.298	1.02	2.549	0.3221	2.697	0.4511	1.628	0.3183
Haemophilus	6.12888	1.28658	4.97455	1.40611	3.97622	1.82486	2.57781	0.860055	1.31766	0.357592	2.1753	1.40427	2.18801	1.0883	3.33183	1.97191	1.3267	0.666077
Helicobacter	0.246525	0.208659	0.0507732	0.0395785	0.0807478	0.053119	1.39106	1.10059	18.95	4.65338	20.2714	6.7438	0.0067437	0.0045442	0.0692015	0.0430757	1.26819	1.02181
Janthinobacterium	0.0318097	0.0221306	0	0	0.0519967	0.0179969	0	0	0	0	0.0256925	0.0193057	0	0	0.0324513	0.0292651	0.00279646	0.00279646
Kingella	0.00917588	0.0035141	0.0507732	0.0186611	0.0385387	0.019318	0.0183518	0.0142603	0.00611726	0.00257465	0.00489381	0.00320375	0.00550553	0.00378743	0.00734214	0.00734214	0.00700226	0.00464634
Kocuria	0.0275277	0.0167684	0	0	0.0923706	0.037334	0	0	0.0024469	0.0024469	0.0550553	0.0305023	0.0710086	0.0197119	0.126264	0.0315445	0.158	0.150002
Lachnoanaerobaculum	0.451454	0.17509	0.812983	0.140622	0.31198	0.100157	0.960409	0.320692	1.21489	0.383132	0.76588	0.311296	1.50728	0.622682	0.977079	0.289905	2.01905	1.05338
Leptotrichia	5.86767	2.36142	6.44514	1.67066	2.36921	0.786334	7.83743	2.0141	6.62621	1.1681	3.11491	1.12457	3.80963	0.941902	2.58038	0.848612	5.83552	2.43245
Micrococcus	0.0391504	0.0208968	0.00183518	0.000986378	0.357859	0.226895	0.0587256	0.0573402	0	0	0.0954292	0.058397	0.168621	0.0690667	0.454655	0.131213	0.169197	0.151638
Moryella	0.368259	0.104396	0.395175	0.105241	0.124792	0.0273426	0.89679	0.454435	0.58481	0.200405	0.466135	0.204864	1.10483	0.414459	0.348513	0.104969	0.882361	0.429507
Neisseria	3.02	2.042	1.868	0.7183	1.351	0.6251	3.504	2.609	2.103	1.052	1.874	1.276	1.148	0.3946	1.534	0.7831	2.277	1.337
Olsenella	0.04649	0.0338	0.112	0.0304	0.2728	0.1005	0.1248	0.08131	0.08933	0.03059	0.2594	0.1142	0.03309	0.01329	0.0355	0.01547	0.0084	0.0045
Oribacterium	0.200034	0.0458032	0.43249	0.0661311	0.0984878	0.0293964	0.466135	0.14862	0.653323	0.169251	0.45023	0.14263	0.350197	0.0656279	0.246773	0.0769691	0.394305	0.172865
Paracoccus	0.0581139	0.0280484	0.00183518	0.000986378	0.27283	0.107094	0.00734071	0.00480562	0	0	0.123569	0.0781245	0.375911	0.142243	0.746746	0.314092	0.424911	0.266838
Parvimonas	0.7983	0.5202	1.661	1.661	1.87	0.816	0.5518	0.3179	1.255	0.4049	0.75	0.2043	1.435	0.5074	1.641	0.7405	0.4994	0.1299
Porphyromonas	1.43389	0.467556	1.8364	0.576118	0.4539	0.146512	1.39229	0.595362	1.33723	0.582318	0.192082	0.0760834	0.333655	0.103787	0.564849	0.227137	0.518743	0.329915
Prevotella	12.8285	1.50977	16.6922	2.31042	5.89642	1.67199	13.9082	2.92713	16.0725	2.09514	5.83709	2.54182	12.6316	2.43807	6.90251	2.01234	18.9698	6.869
Propionibacterium	1.70733	1.37316	0.0538319	0.0243382	3.51069	1.72512	0.117451	0.0791267	0.0538319	0.0278683	0.490604	0.202297	2.07002	0.869736	2.66863	0.728464	5.1616	3.09004
Pseudomonas	0.286899	0.172059	0.00795243	0.00499222	0.578081	0.220534	0	0	0.00367035	0.00257465	0.0440442	0.0247471	0.0895548	0.0470562	0.0832662	0.0204668	0	0
Rothia	1.742	0.2823	1.858	0.5878	2.608	0.6446	2.663	0.906	0.794	0.2444	1.427	0.3749	2.691	1.132	1.533	0.4507	2.811	1.905
Schlegelella	0	0	0.001838	0.001333	0	0	0	0	0	0	0.008563	0.006252	0.09743	0.04617	0.08776	0.03568	0.2755	0.2563
Staphylococcus	1.2155	1.0924	0.190247	0.184393	1.20449	0.61483	0.605608	0.597232	0.0122345	0.00547144	0.239796	0.141643	0.97688	0.355616	1.39848	0.330307	2.90649	1.62199
Streptococcus	21.1718	4.31635	22.7935	2.67291	40.7801	4.71375	24.239	4.69391	19.8248	4.10145	32.6772	4.17164	39.4684	3.1926	41.6522	4.83118	23.831	6.47003
Tannerella	0.0954292	0.025374	0.441054	0.126115	0.055667	0.0310634	0.150484	0.0637252	0.187188	0.0655644	0.0269159	0.0110595	0.0391615	0.0248188	0.0152967	0.00889086	0.0880885	0.072335
Tessaracoccus	0.003056	0.003056	0.03916	0.02109	0.5353	0.4987	0.02691	0.01318	0.1211	0.1142	0.06975	0.05295	0.0006125	0.0006125	0.00245	0.00245	0.0056	0.0056
Treponema	2.45547	0.959978	1.37761	0.550801	0.173118	0.0865928	0.783009	0.341155	0.734071	0.293028	0.296075	0.242603	0.194064	0.0888015	0.0330519	0.0317703	0.114655	0.0670567
Veillonella	7.71386	1.59351	2.28418	0.399133	1.67796	0.776578	3.56024	1.16357	1.5232	0.622855	1.88167	0.726631	2.31343	0.513099	1.38166	0.363923	2.44601	0.608657
Genera differently distributed between sampled sites. Given are those genera, which differed in abundance between sampling sites at least once with p<0.01. p-Values <0.05 are given. Higher p-values are indicated by ns, not significant
	OAX/OAH	SAX/SAH	DAX/DAH	SBX/SBH	DBX/DBH	OAX/SAX	SAX/DAX	SAX/SBX	DAX/DBX	SBX/DBX	OAH/SAH	SAH/DAH	SAH/SBH	DAH/DBH	SBH/DBH	SBX/DAX
Acinetobacter	ns	ns	ns	ns	ns	ns	0.0384	ns	ns	ns	ns	ns	ns	ns	ns	ns
Actinobaculum	ns	ns	ns	ns	ns	ns	ns	ns	0.0168	ns	ns	ns	ns	ns	ns	0.0032
Actinomyces	ns	ns	ns	ns	ns	ns	ns	ns	ns	ns	ns	ns	0.0304	ns	ns	ns
Alloprevotella	ns	ns	ns	ns	ns	ns	0.0328	0.0152	ns	ns	ns	0.0250667	0.0152	ns	ns	ns
Anaerococcus	ns	ns	ns	ns	ns	ns	0.0032	ns	ns	ns	ns	ns	ns	ns	ns	ns
Atopobium	ns	ns	ns	ns	ns	ns	ns	ns	ns	ns	ns	ns	0.048	ns	ns	ns
Bacteroides	ns	ns	ns	0.0016	ns	ns	ns	0.00128638	ns	ns	ns	ns	ns	ns	ns	0.00373333
Brevundimonas	ns	ns	ns	ns	ns	ns	0.0128	0.0192	ns	ns	ns	ns	ns	ns	ns	ns
Campylobacter	ns	ns	ns	0.0096	ns	ns	0.00112086	0.000151296	ns	0.0384	ns	ns	0.0032	ns	ns	ns
Capnocytophaga	ns	ns	ns	ns	ns	ns	ns	ns	ns	ns	ns	ns	0.0288	ns	ns	ns
Corynebacterium	ns	ns	ns	0.0019967	ns	ns	0.0096	0.0032	ns	ns	ns	ns	ns	ns	ns	ns
Dermacoccus	ns	ns	ns	ns	ns	ns	0.02	0.02	ns	ns	ns	ns	ns	ns	ns	ns
Enhydrobacter	ns	ns	ns	0.0168	ns	ns	0.0032	0.0362667	0.04672	ns	ns	ns	ns	ns	ns	0.0428
Enterococcus	ns	ns	ns	0.04	ns	ns	ns	0.0032	ns	ns	ns	ns	ns	ns	ns	0.0248
Eubacterium	ns	ns	ns	0.0368	ns	0.0344	ns	ns	ns	ns	ns	ns	0.0344	ns	ns	ns
Fusobacterium	ns	ns	ns	0.0144	ns	0.01856	0.000377872	0.0064	ns	ns	ns	ns	0.0048	ns	ns	ns
Gemella	ns	ns	ns	0.0024	ns	ns	ns	ns	ns	ns	ns	ns	0.0024	ns	0.0064	ns
Granulicatella	ns	ns	ns	0.0016	ns	ns	ns	ns	ns	ns	ns	ns	0.0016	ns	0.0032	ns
Haemophilus	ns	0.0282594	ns	0.0032	ns	ns	ns	0.0064	ns	ns	ns	ns	0.0064	ns	ns	ns
Helicobacter	ns	0.000340688	0.000642027	0.000340688	ns	ns	ns	ns	ns	ns	0.0016	ns	0.0008	ns	0.00096	ns
Janthinobacterium	ns	ns	ns	ns	ns	ns	0.000790224	ns	0.0421333	ns	ns	ns	ns	ns	ns	0.000790224
Kingella	ns	ns	ns	ns	ns	ns	ns	0.024	ns	ns	ns	ns	ns	ns	ns	ns
Kocuria	ns	ns	ns	0.0442667	ns	ns	0.000785368	0.00055704	ns	ns	ns	ns	ns	ns	ns	ns
Lachnoanaerobaculum	ns	ns	ns	ns	ns	0.0304	0.016	ns	ns	ns	ns	ns	ns	ns	ns	0.0362667
Leptotrichia	ns	ns	ns	ns	ns	ns	ns	ns	ns	ns	ns	ns	0.048	ns	ns	ns
Micrococcus	ns	ns	ns	0.0484	ns	ns	0.00085208	0.00011488	ns	ns	ns	0.00746667	ns	ns	ns	ns
Moryella	ns	ns	ns	ns	ns	ns	0.0472	ns	ns	ns	ns	ns	0.0472	ns	ns	ns
Neisseria	ns	ns	ns	0.0272	ns	ns	ns	ns	ns	ns	ns	ns	ns	ns	ns	ns
Olsenella	ns	ns	ns	ns	ns	0.0176	ns	0.0330667	0.0330667	ns	ns	ns	0.0330667	0.008	ns	0.0330667
Oribacterium	ns	ns	ns	ns	ns	ns	0.0032	ns	ns	ns	ns	ns	0.0048	ns	ns	0.0485333
Paracoccus	ns	ns	ns	ns	ns	ns	0.0056	0.0016	ns	ns	ns	ns	ns	ns	ns	ns
Parvimonas	ns	ns	ns	ns	ns	0.0448	ns	ns	ns	ns	ns	ns	0.0304	ns	ns	ns
Porphyromonas	ns	ns	ns	ns	ns	ns	0.012	0.0016	ns	ns	ns	ns	ns	ns	ns	ns
Prevotella	ns	ns	ns	0.0192	ns	ns	0.0048	ns	ns	ns	ns	ns	0.0192	ns	ns	ns
Propionibacterium	ns	ns	ns	0.00533333	ns	ns	0.0032	0.000406432	ns	ns	ns	0.0148	ns	ns	ns	ns
Pseudomonas	ns	ns	ns	ns	ns	ns	0.00343802	ns	0.0458667	ns	ns	ns	ns	ns	ns	0.0458667
Rothia	ns	ns	ns	0.0032	ns	ns	ns	ns	ns	ns	ns	ns	0.0408	ns	ns	ns
Schlegelella	ns	ns	ns	ns	ns	ns	ns	0.0192	0.0362667	ns	ns	ns	ns	ns	ns	0.0192
Staphylococcus	ns	ns	ns	0.0453333	ns	ns	0.00117227	0.000782496	ns	ns	ns	ns	ns	ns	ns	ns
Streptococcus	ns	ns	ns	8.7024e-05	ns	ns	0.01088	0.0012	ns	ns	ns	ns	0.0012	ns	0.0012	ns
Tannerella	ns	ns	ns	ns	ns	ns	ns	0.0048	ns	ns	ns	ns	ns	ns	ns	ns
Tessaracoccus	ns	ns	ns	ns	ns	0.0136	ns	0.0096	ns	ns	ns	ns	ns	ns	ns	ns
Treponema	ns	ns	ns	ns	ns	ns	ns	ns	0.008	ns	ns	ns	ns	ns	ns	ns
Veillonella	ns	ns	ns	0.0016	ns	0.0362667	ns	ns	ns	ns	ns	ns	0.0362667	ns	ns	ns
